# Supplementary material for: Unlocking the antidiabetic potential of novel pyrazole-triazole hybrids through synthesis, dual α-amylase/α-glucosidase inhibition, multiscale biological evaluation, and molecular dynamics studies
Source: Royal Society of Chemistry journal article supplement (doi:10.1039/d6ra02783k), 2026-06-02
Supplement: d6ra02783k1.pdf [file d6ra02783k1.pdf]

## Supplementary

### **Unlocking the Antidiabetic Potential of Novel Pyrazole–Triazole Hybrids Through Synthesis, Dual $\alpha$ -Amylase/ $\alpha$ -Glucosidase Inhibition, Multiscale Biological Evaluation, and Molecular Dynamics Studies**

Mariam M. Fakhry<sup>1\*</sup>, Mahmoud S. Elkotamy<sup>2</sup>, Mohamed K. Elgohary<sup>1</sup>, Mahmoud Abdelrahman Alkabbani<sup>3</sup>, Mayada H. Mohamed<sup>4</sup>, Abdulrahman A. Almehezia<sup>5</sup>, Ahmed M. Naglah<sup>5\*</sup>, Morkoss M. Fakhry<sup>6</sup>, Mohamed Fares<sup>1,7</sup>, Hatem A Abdel-Aziz<sup>8\*</sup>, Jalloul Bouajila<sup>9\*</sup>

<sup>1</sup> Pharmaceutical Chemistry Department, Faculty of Pharmacy, Egyptian Russian University, Badr, Egypt.

<sup>2</sup> Department of Pharmaceutical Chemistry, Faculty of Pharmacy, Alsalam University, Kafr Alzayat 31611, Algharbia, Egypt.

<sup>3</sup> Pharmacology and Toxicology Department, Faculty of Pharmacy, Egyptian Russian University, Badr City, Cairo 11829, Egypt.

<sup>4</sup> University Family Medicine Center, Department of Family and Community Medicine, College of Medicine, King Saud University Medical City, P.O. Box 2925, Riyadh 11472, Saudi Arabia.

<sup>5</sup> Drug Exploration and Development Chair (DEDC), Department of Pharmaceutical Chemistry, College of Pharmacy, King Saud University, P.O. Box 2457, Riyadh 11451, Saudi Arabia.

<sup>6</sup> Biochemistry Department, Faculty of Pharmacy, Egyptian Russian University, Badr City, Cairo 11829, Egypt.

<sup>7</sup> Sydney Pharmacy School, The University of Sydney, Sydney, New South Wales 2006, Australia

<sup>8</sup> Applied Organic Chemistry Department, National Research Center, Dokki, Cairo 12622, Egypt.

<sup>9</sup> Laboratoire de Génie Chimique, Université de Toulouse, Toulouse INP, CNRS, LGC, Toulouse, France.

**\*Corresponding Authors**

[Mariam-medhat@eru.edu.eg](mailto:Mariam-medhat@eru.edu.eg), [anaglah@ksu.edu.sa](mailto:anaglah@ksu.edu.sa), [Hatem\\_741@yahoo.com](mailto:Hatem_741@yahoo.com), [jalloul.bouajila@univ-tlse3.fr](mailto:jalloul.bouajila@univ-tlse3.fr)

## Supplementary content

|                                                                                                                                                                                                                                                                                                                                                                                                                                                                                                                        |           |
|------------------------------------------------------------------------------------------------------------------------------------------------------------------------------------------------------------------------------------------------------------------------------------------------------------------------------------------------------------------------------------------------------------------------------------------------------------------------------------------------------------------------|-----------|
| Supplementary content.....                                                                                                                                                                                                                                                                                                                                                                                                                                                                                             | 3         |
| <b>Results and discussion .....</b>                                                                                                                                                                                                                                                                                                                                                                                                                                                                                    | <b>7</b>  |
| Table S 1. The %inhibition of 8a-i and 12a-i against $\alpha$ -glucosidase at 25 $\mu$ M. ....                                                                                                                                                                                                                                                                                                                                                                                                                         | 14        |
| Table S 2. Effect of compounds 8g, 12d, and 12e on postprandial blood glucose levels in alloxan-induced diabetic rats .....                                                                                                                                                                                                                                                                                                                                                                                            | 15        |
| Data are expressed as mean $\pm$ SD and were analyzed using two-way ANOVA followed by Tukey's post hoc test. The letters a, b, and c indicate statistically significant differences at $p < 0.05$ , where <sup>a</sup> denotes comparison with the normal control group, <sup>b</sup> with the diabetic control group, and <sup>c</sup> with the vildagliptin-treated group.....                                                                                                                                       | 15        |
| Figure S 1. Food intake in normoglycemic mice during the oral glucose tolerance test. Data are expressed as mean $\pm$ SD and were analyzed using one-way ANOVA, followed by Tukey's post hoc test. No statistically significant differences were observed among groups ( $p > 0.05$ ), indicating that changes in blood glucose levels were not attributable to altered food intake.....                                                                                                                              | 16        |
| Figure S 2: <i>Effect of compounds 8g, 12d, and 12e on blood glucose levels in normoglycemic mice during the oral glucose tolerance test. Data are expressed as mean <math>\pm</math> SD and were analyzed using two-way ANOVA followed by Tukey's post hoc test. The letters a, b, and c indicate statistically significant differences at <math>p &lt; 0.05</math>, where a denotes comparison with the normal control group, b with the diabetic control group, and c with the vildagliptin-treated group. ....</i> | 16        |
| <b>Molecular Docking.....</b>                                                                                                                                                                                                                                                                                                                                                                                                                                                                                          | <b>18</b> |
| Figure S 3. Binding mode of co-crystallized ligand in the binding site of co-crystallized MALTOPENTAOSE in amylase active site (PDB:1BAG).....                                                                                                                                                                                                                                                                                                                                                                         | 19        |
| Figure S 4. Superimposition of co-crystallized MALTOPENTAOSE (purple) and redocked MALTOPENTAOSE (blue) for validation of docking protocol. ....                                                                                                                                                                                                                                                                                                                                                                       | 20        |
| Figure S 5. Binding mode of co-crystallized ligand in the binding site of co-crystallized $\alpha$ -D-Glucopyranose in glycosidase active site (PDB:3A4A). ....                                                                                                                                                                                                                                                                                                                                                        | 20        |

|                                                                                                                                                                                |           |
|--------------------------------------------------------------------------------------------------------------------------------------------------------------------------------|-----------|
| Figure S 6. Superimposition of co-crystallized $\alpha$ -D-Glucopyranose (purple) and redocked $\alpha$ -D-Glucopyranose (blue) for validation of docking protocol.....        | 21        |
| Table S 3. Binding score, amino acid interaction and bond length of compounds 7g, 10d and 10e within the active site of alpha-amylase and alpha glycosidase active sites. .... | 22        |
| <b>Virtual ADMET Studies.....</b>                                                                                                                                              | <b>24</b> |
| <b><math>^1\text{H}</math>NMR and <math>^{13}\text{C}</math>NMR Spectra.....</b>                                                                                               | <b>26</b> |
| Figure S 8. $^1\text{H}$ NMR of compound 8a.....                                                                                                                               | 27        |
| Figure S 9. $^{13}\text{C}$ NMR of compound 8a .....                                                                                                                           | 28        |
| Figure S 10. $^1\text{H}$ NMR of compound 8b .....                                                                                                                             | 29        |
| Figure S 11. $^{13}\text{C}$ NMR of compound 8b .....                                                                                                                          | 30        |
| Figure S 12. $^1\text{H}$ NMR of compound 8c.....                                                                                                                              | 31        |
| Figure S 13. $^{13}\text{C}$ NMR of compound 8c .....                                                                                                                          | 32        |
| Figure S 14. $^1\text{H}$ NMR of compound 8d .....                                                                                                                             | 33        |
| Figure S 15.. $^{13}\text{C}$ NMR of compound 8d .....                                                                                                                         | 34        |
| Figure S 16. $^1\text{H}$ NMR of compound 8e.....                                                                                                                              | 35        |
| Figure S 17.. $^{13}\text{C}$ NMR of compound 8e .....                                                                                                                         | 36        |
| Figure S 18. $^1\text{H}$ NMR of compound 8f.....                                                                                                                              | 37        |
| Figure S 19.. $^{13}\text{C}$ NMR of compound 8f.....                                                                                                                          | 38        |
| Figure S 20. $^1\text{H}$ NMR of compound 8g .....                                                                                                                             | 39        |
| Figure S 21. $^{13}\text{C}$ NMR of compound 8g .....                                                                                                                          | 40        |
| Figure S 22. $^1\text{H}$ NMR of compound 8h .....                                                                                                                             | 41        |
| Figure S 23. $^{13}\text{C}$ NMR of compound 8h .....                                                                                                                          | 42        |
| Figure S 24. $^1\text{H}$ NMR of compound 8i .....                                                                                                                             | 43        |
| Figure S 25. $^{13}\text{C}$ NMR of compound 8i .....                                                                                                                          | 44        |

|                                                        |           |
|--------------------------------------------------------|-----------|
| Figure S 26. $^1\text{H}$ NMR of compound 12a.....     | 45        |
| Figure S 27. $^{13}\text{C}$ NMR of compound 12a.....  | 47        |
| Figure S 28. $^1\text{H}$ NMR of compound 12b .....    | 49        |
| Figure S 29. $^{13}\text{C}$ NMR of compound 12b ..... | 51        |
| Figure S 30. $^1\text{H}$ NMR of compound 12c.....     | 53        |
| Figure S 31. $^{13}\text{C}$ NMR of compound 12c ..... | 55        |
| Figure S 32. $^1\text{H}$ NMR of compound 12d .....    | 57        |
| Figure S 33. $^{13}\text{C}$ NMR of compound 12d ..... | 59        |
| Figure S 34. $^1\text{H}$ NMR of compound 12e.....     | 61        |
| Figure S 35. $^{13}\text{C}$ NMR of compound 12e ..... | 63        |
| Figure S 36. $^1\text{H}$ NMR of compound 12f.....     | 65        |
| Figure S 37. $^{13}\text{C}$ NMR of compound 12f.....  | 67        |
| Figure S 38. $^1\text{H}$ NMR of compound 12g .....    | 69        |
| Figure S 39. $^{13}\text{C}$ NMR of compound 12g ..... | 71        |
| Figure S 40. $^1\text{H}$ NMR of compound 12h .....    | 73        |
| Figure S 41. $^{13}\text{C}$ NMR of compound 12h ..... | 75        |
| Figure S 42. $^1\text{H}$ NMR of compound 12i .....    | 77        |
| Figure S43: $^{13}\text{C}$ NMR of compound 12i.....   | 79        |
| <b>High Resolution Mass Spectroscopy .....</b>         | <b>80</b> |
| Figure S 44: Mass of compound 8a .....                 | 81        |
| Figure S 45. Mass of compound 8b .....                 | 82        |
| Figure S 46. Mass of compound 8c .....                 | 83        |
| Figure S 47. Mass of compound 8d .....                 | 84        |
| Figure S 48. Mass of compound 8e .....                 | 85        |

|                                        |           |
|----------------------------------------|-----------|
| Figure S 49. Mass of compound 8f.....  | 86        |
| Figure S 50. Mass of compound 8g.....  | 87        |
| Figure S 51. Mass of compound 8h.....  | 88        |
| Figure S 52. Mass of compound 8i.....  | 89        |
| Figure S 53. Mass of compound 12a..... | 90        |
| Figure S 54. Mass of compound 12b..... | 91        |
| Figure S 55. Mass of compound 12c..... | 92        |
| Figure S 56. Mass of compound 12d..... | 93        |
| Figure S 57. Mass of compound 12e..... | 94        |
| Figure S 58. Mass of compound 12f..... | 95        |
| Figure S 59. Mass of compound 12g..... | 96        |
| Figure S 60. Mass of compound 12h..... | 97        |
| Figure S 61. Mass of compound 12i..... | 98        |
| <b>Infera Red Charts .....</b>         | <b>63</b> |
| Figure S 62. IR of compound 8a.....    | 64        |
| Figure S 63. IR of compound 8b.....    | 65        |
| Figure S 64. IR of compound 8c.....    | 66        |
| Figure S 65. IR of compound 8d.....    | 67        |
| Figure S 66. IR of compound 8e.....    | 68        |
| Figure S 67. IR of compound 8f.....    | 69        |
| Figure S 68. IR of compound 8g.....    | 70        |
| Figure S 69. IR of compound 8h.....    | 71        |
| Figure S 70. IR of compound 8i.....    | 72        |
| Figure S 71. IR of compound 12i.....   | 73        |

# **Results and discussion**

**Amylase Inhibition% of Sample 8a (Conc. µg/ml)**

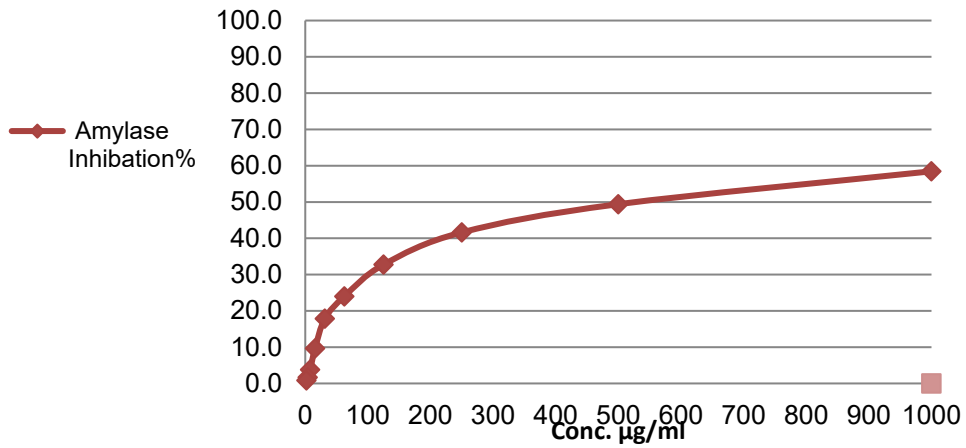

**Amylase Inhibition% of Sample 8b (Conc. µg/ml)**

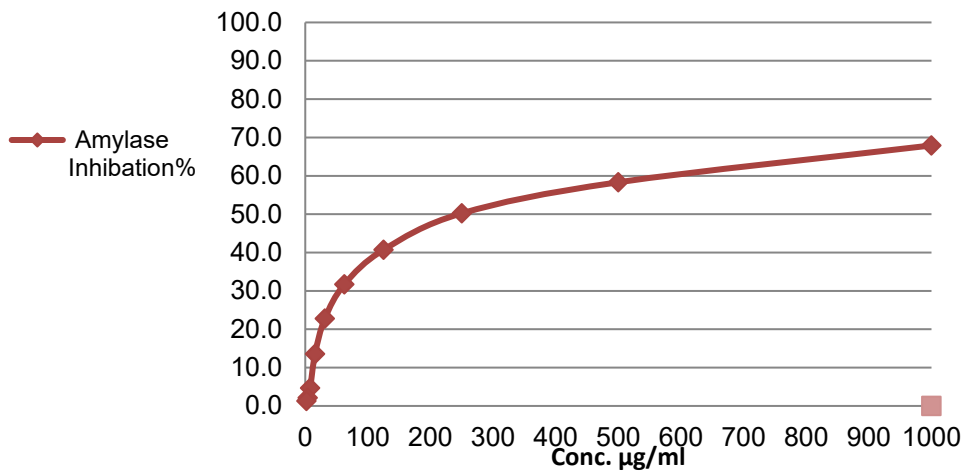

**Amylase Inhibition% of Sample 8C (Conc. µg/ml)**

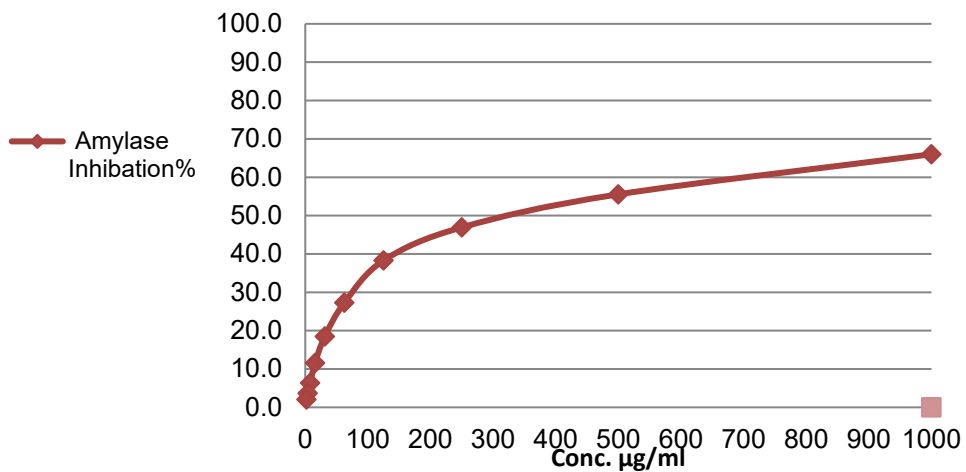

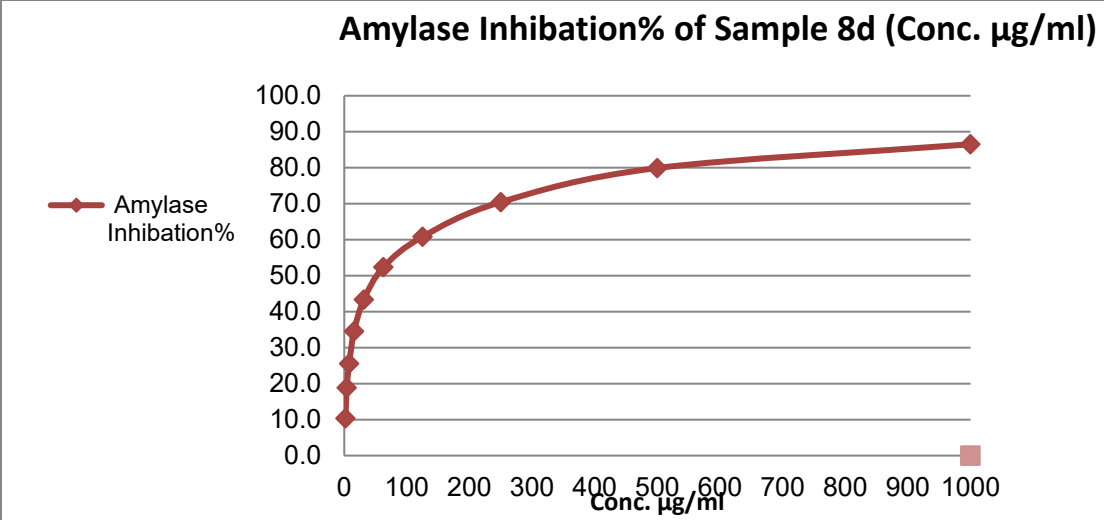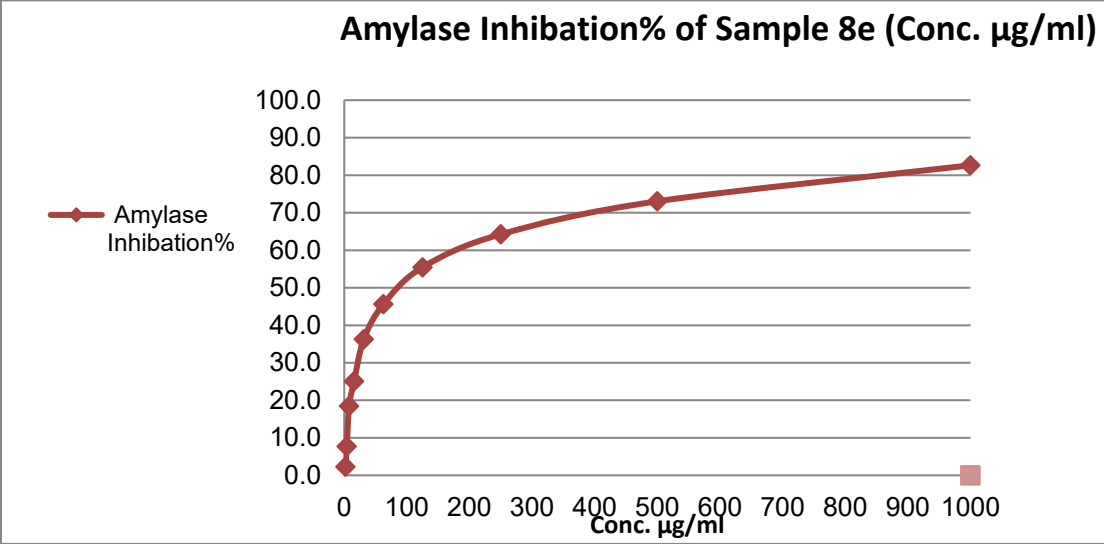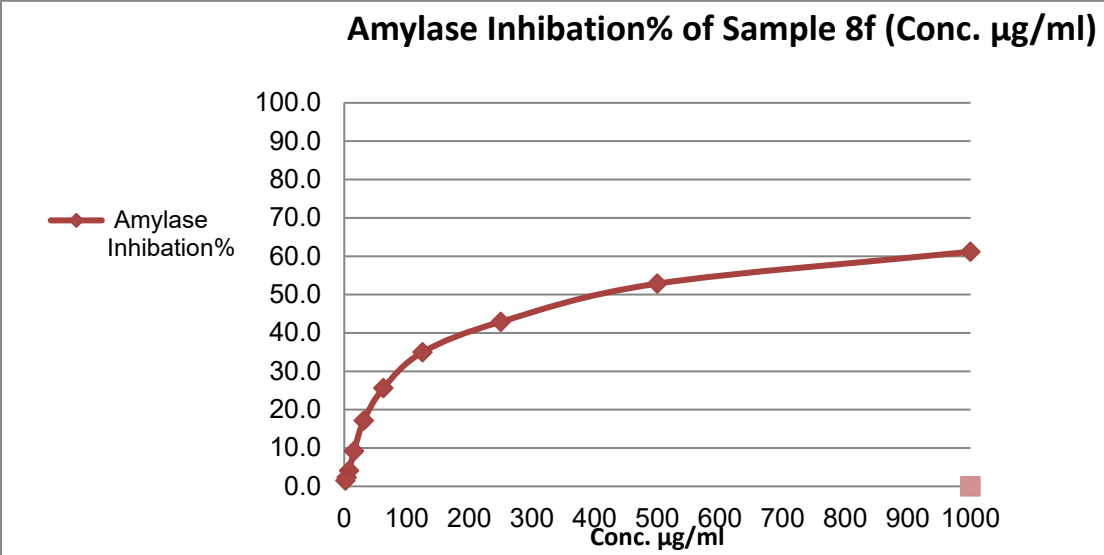

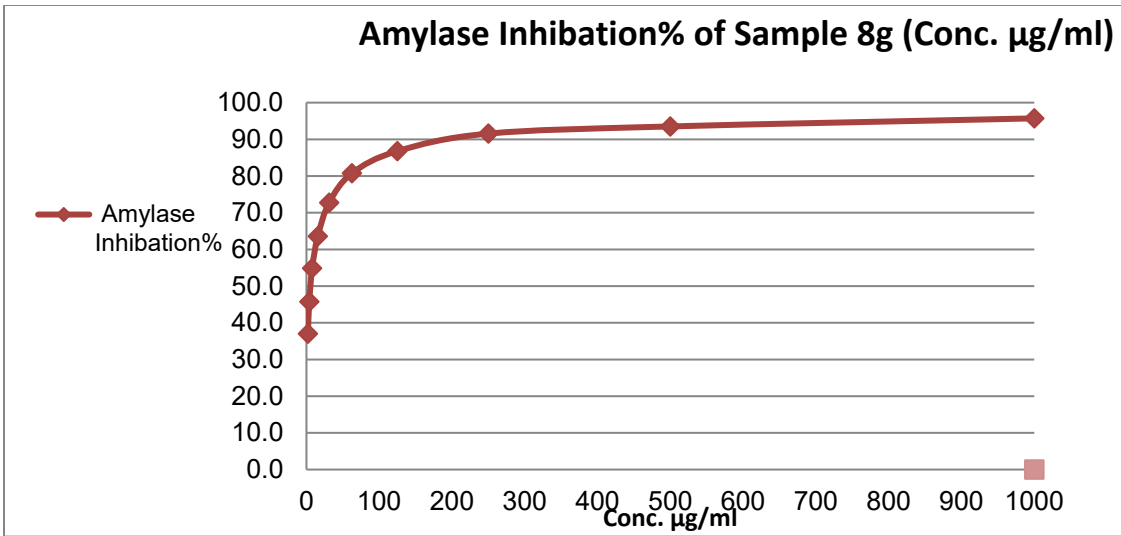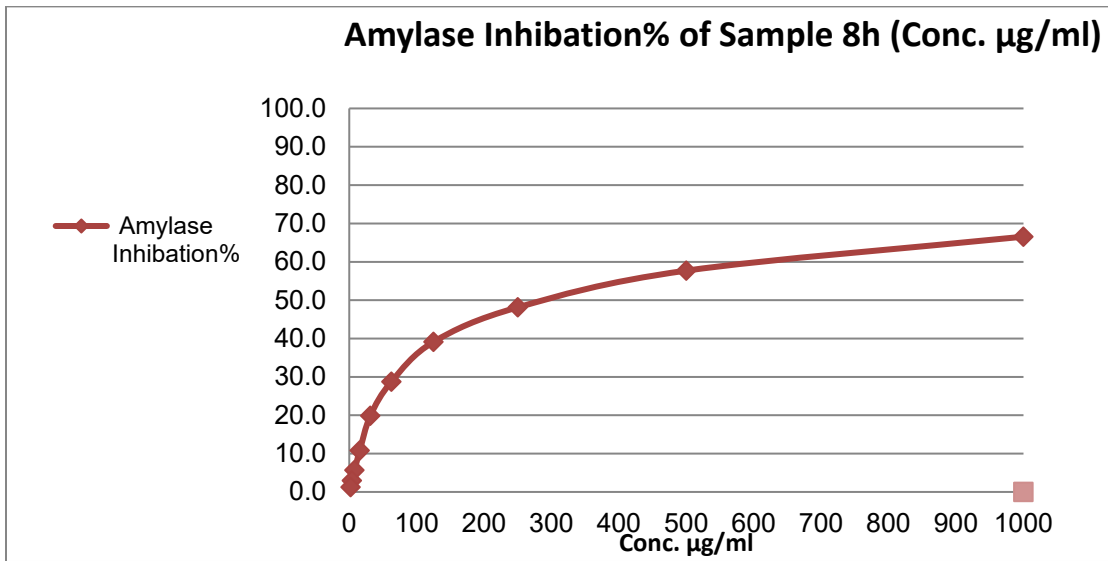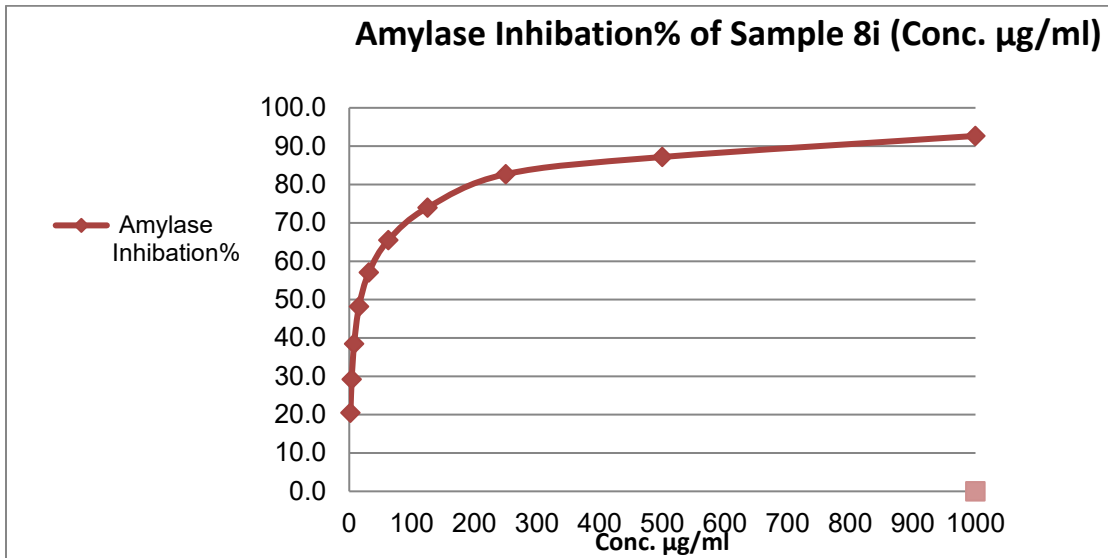

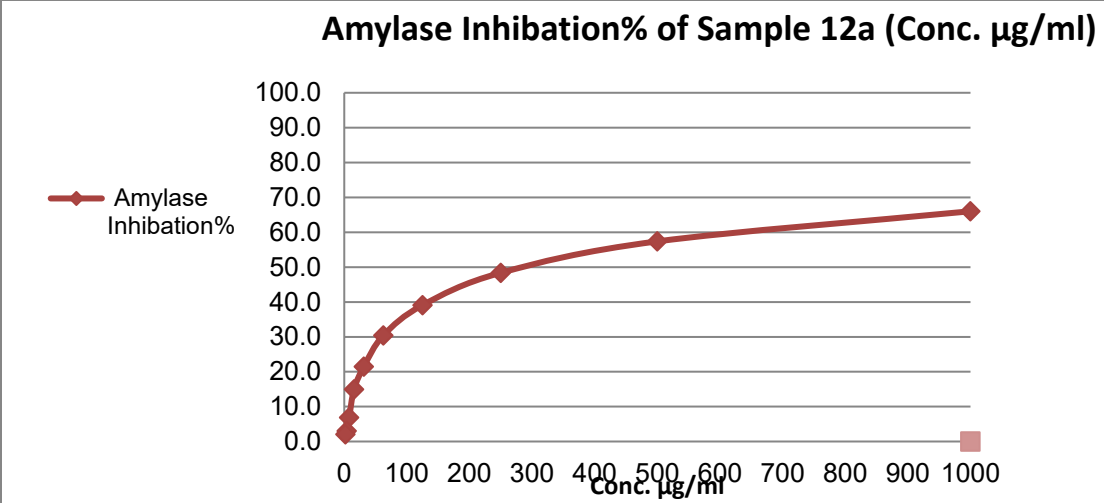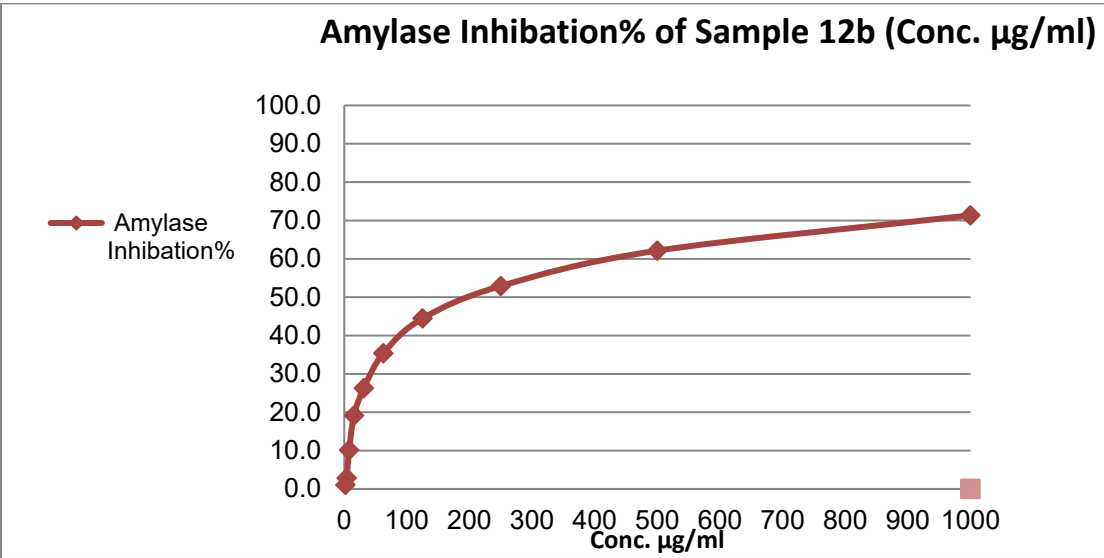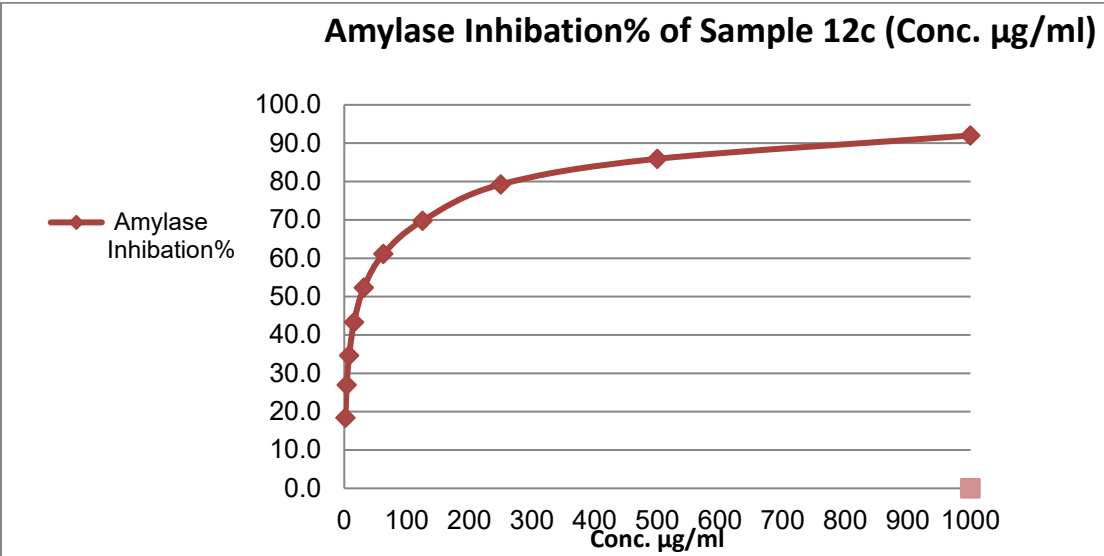

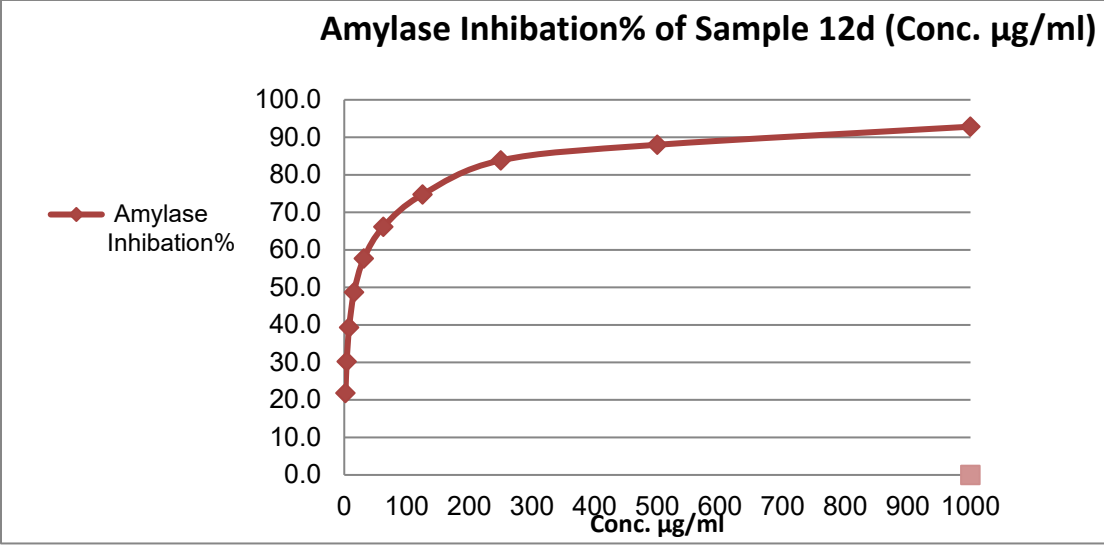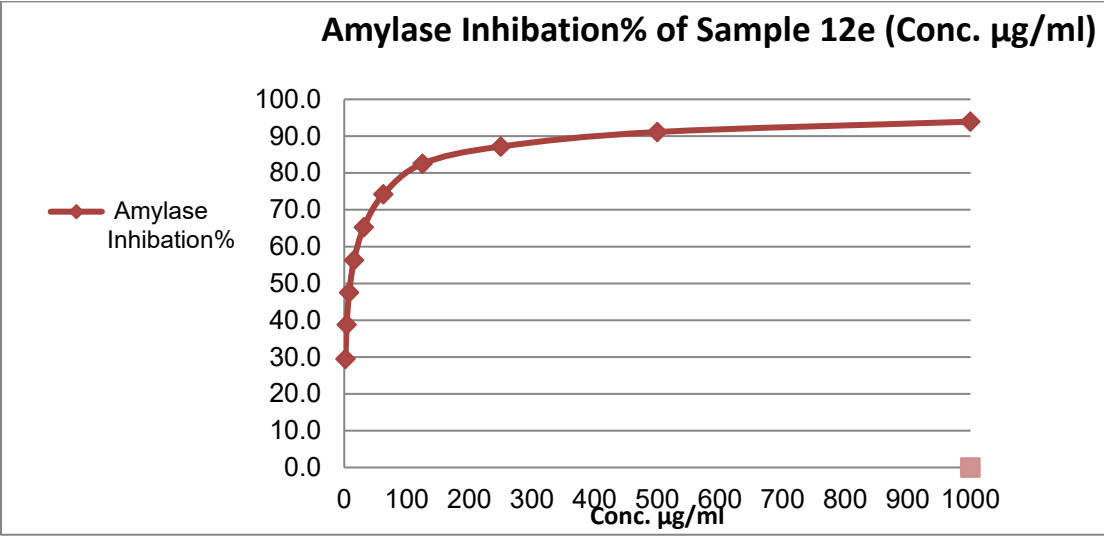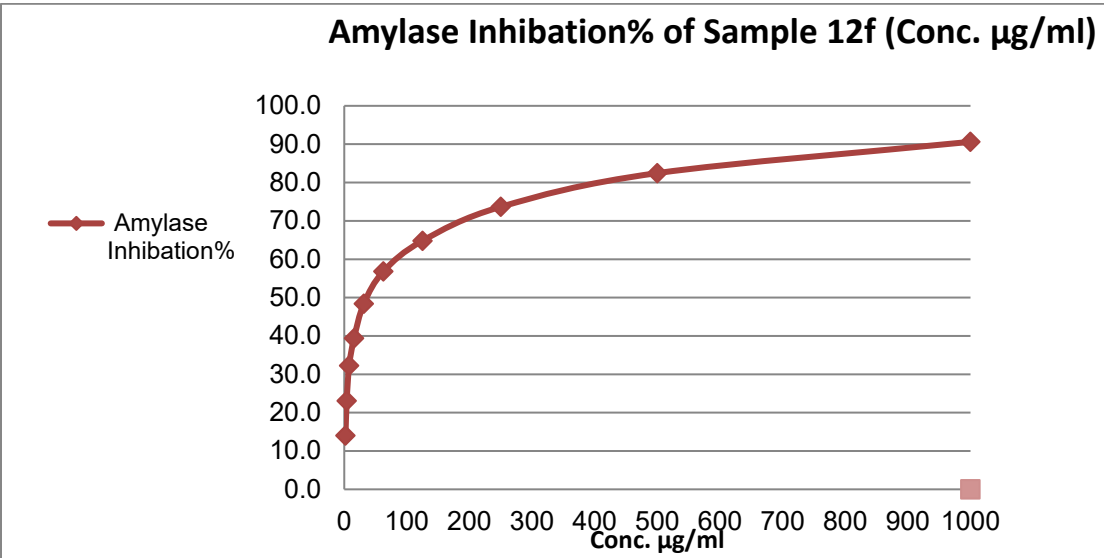

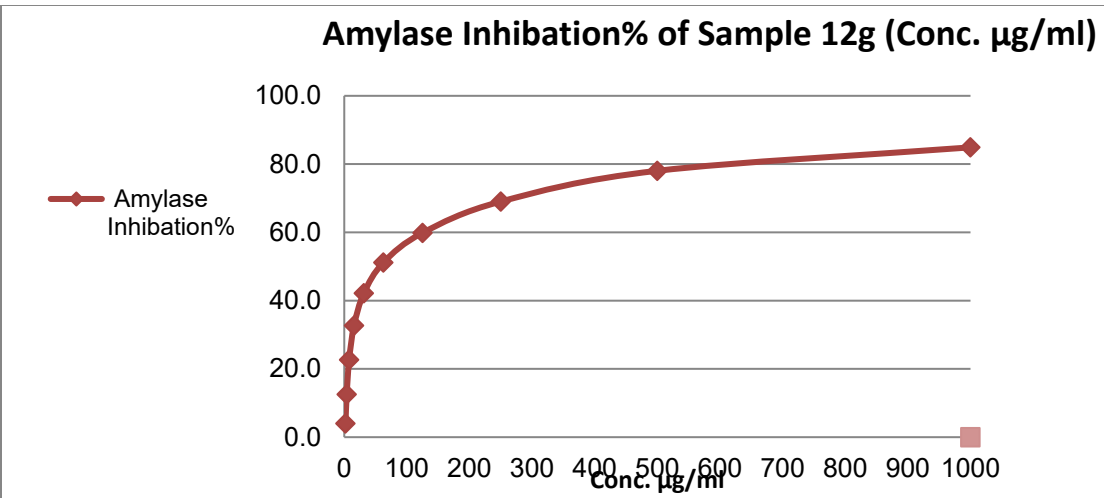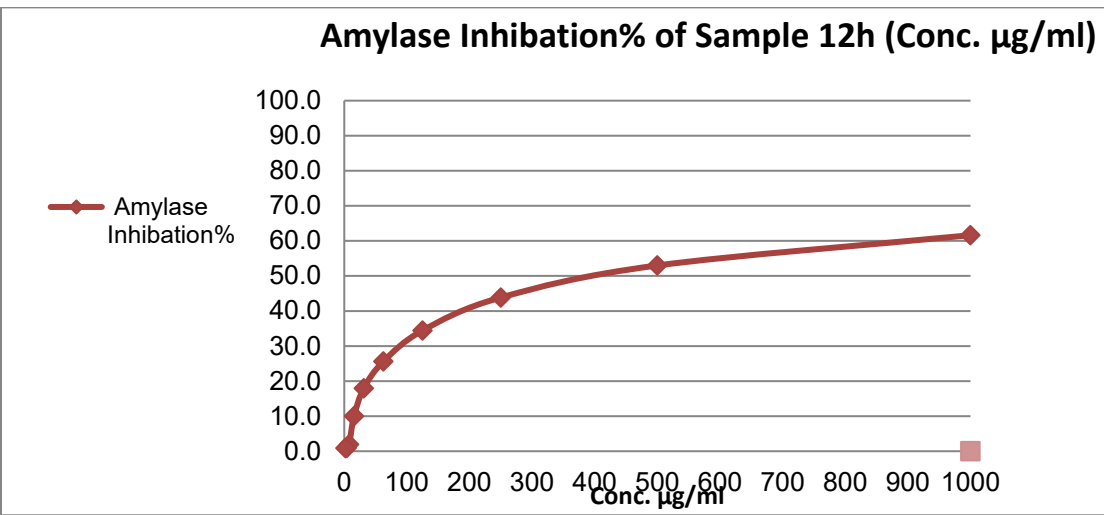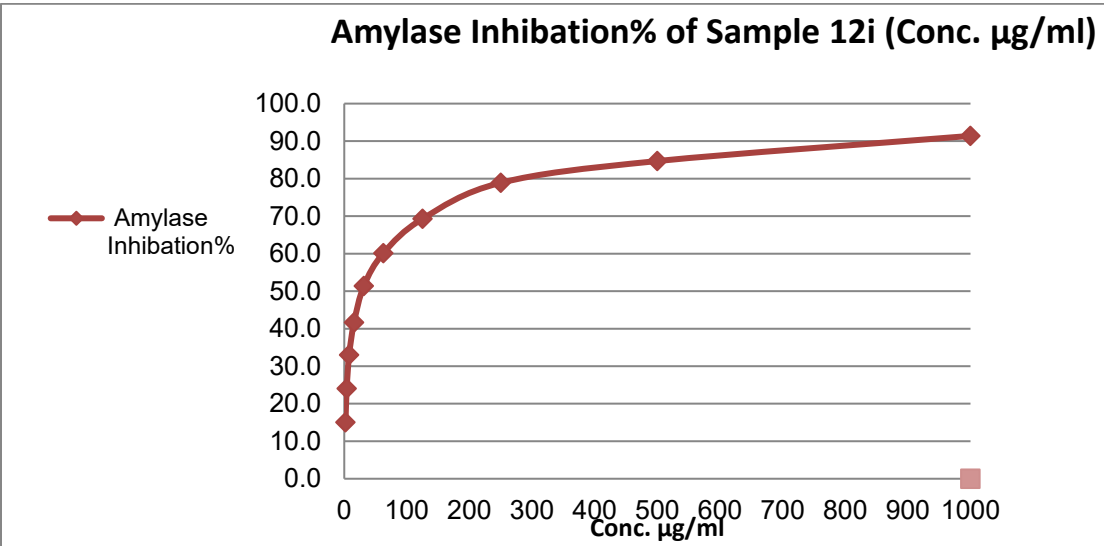

**Table S 1.** The %inhibition of **8a-i** and **12a-i** against  $\alpha$ -glucosidase at 25  $\mu$ M.

| <b>Compounds</b> | <b>Inhibition%</b> |
|------------------|--------------------|
| <b>8a</b>        | 33.88 $\pm$ 3.28   |
| <b>8b</b>        | 30.74 $\pm$ 0.61   |
| <b>8c</b>        | 59.05 $\pm$ 2.74   |
| <b>8d</b>        | 50.34 $\pm$ 2.68   |
| <b>8e</b>        | 20.42 $\pm$ 3.523  |
| <b>8f</b>        | 35.12 $\pm$ 3.96   |
| <b>8g</b>        | 62.46 $\pm$ 3.40   |
| <b>8h</b>        | 7.89 $\pm$ 2.49    |
| <b>8i</b>        | 9.36 $\pm$ 1.37    |
| <b>12a</b>       | 65.18 $\pm$ 5.01   |
| <b>12b</b>       | 54.99 $\pm$ 0.76   |
| <b>12c</b>       | 51.73 $\pm$ 5.34   |
| <b>12d</b>       | 21.08 $\pm$ 2.35   |
| <b>12e</b>       | 10.38 $\pm$ 0.83   |
| <b>12f</b>       | 5.07 $\pm$ 1.21    |
| <b>12g</b>       | 14.00 $\pm$ 1.15   |
| <b>12h</b>       | 12.59 $\pm$ 1.09   |
| <b>12i</b>       | 3.97 $\pm$ 0.64    |
| <b>Acarbose</b>  | 63.42 $\pm$ 1.24   |

**Table S 2.** Effect of compounds **8g**, **12d**, and **12e** on postprandial blood glucose levels in alloxan-induced diabetic rats

|                         | Glucose (mg/dL)             |                              |                              |                              |                              |
|-------------------------|-----------------------------|------------------------------|------------------------------|------------------------------|------------------------------|
|                         | 0 Mins                      | 30 Mins                      | 60 Mins                      | 90 Mins                      | 120 Mins                     |
| <b>Normal Control</b>   | 82.17 ± 6.52                | 167.17 ± 3.76                | 160.5 ± 7.45                 | 146.17 ± 4.54                | 137.33 ± 6.92                |
| <b>Diabetic Control</b> | 286.17 ± 8.35 <sup>a</sup>  | 399.33 ± 14.18 <sup>a</sup>  | 373 ± 5.29 <sup>a</sup>      | 358.5 ± 4.97 <sup>a</sup>    | 342.67 ± 9.81 <sup>a</sup>   |
| <b>Vildagliptin</b>     | 280.5 ± 5.86 <sup>a</sup>   | 324.83 ± 5.12 <sup>ab</sup>  | 289.67 ± 10.89 <sup>ab</sup> | 278.83 ± 5.34 <sup>ab</sup>  | 285.5 ± 6.98 <sup>ab</sup>   |
| <b>8g</b>               | 290.17 ± 7.05 <sup>a</sup>  | 301.5 ± 6.22 <sup>abc</sup>  | 268.83 ± 5.12 <sup>abc</sup> | 228.83 ± 5.04 <sup>abc</sup> | 209.83 ± 4.96 <sup>abc</sup> |
| <b>12d</b>              | 288.17 ± 13.51 <sup>a</sup> | 322.83 ± 9.33 <sup>ab</sup>  | 295.83 ± 5.52 <sup>ab</sup>  | 283 ± 2.19 <sup>ab</sup>     | 280.33 ± 4.08 <sup>ab</sup>  |
| <b>12e</b>              | 286.17 ± 4.26 <sup>a</sup>  | 310.33 ± 2.88 <sup>abc</sup> | 291.17 ± 3.6 <sup>ab</sup>   | 240.17 ± 2.93 <sup>abc</sup> | 242.17 ± 4.17 <sup>abc</sup> |

Data are expressed as mean ± SD and were analyzed using two-way ANOVA followed by Tukey's post hoc test. The letters a, b, and c indicate statistically significant differences at  $p < 0.05$ , where <sup>a</sup> denotes comparison with the normal control group, <sup>b</sup> with the diabetic control group, and <sup>c</sup> with the vildagliptin-treated group.

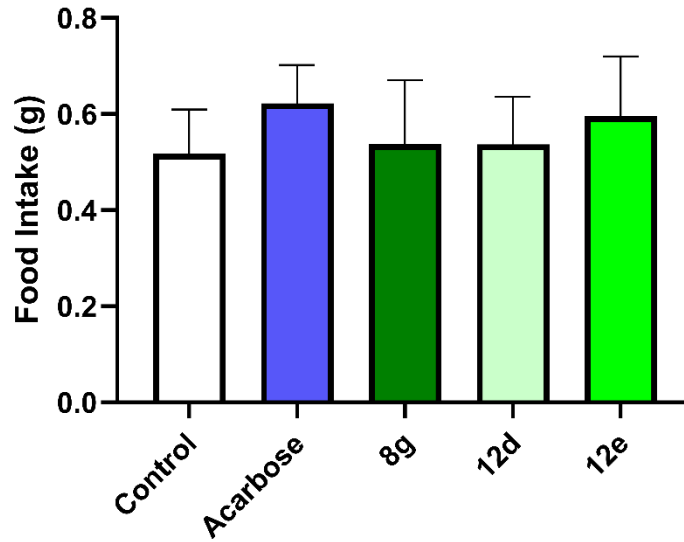

**Figure S 1.** Food intake in normoglycemic mice during the oral glucose tolerance test. Data are expressed as mean  $\pm$  SD and were analyzed using one-way ANOVA, followed by Tukey's post hoc test. No statistically significant differences were observed among groups ( $p > 0.05$ ), indicating that changes in blood glucose levels were not attributable to altered food intake.

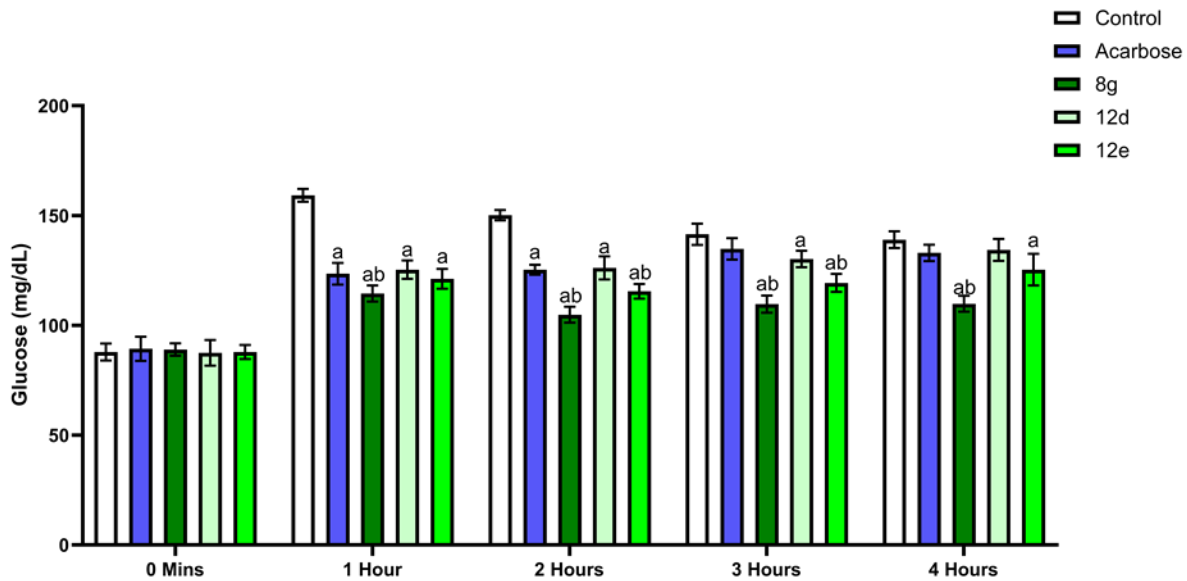

**Figure S 2:** Effect of compounds **8g**, **12d**, and **12e** on blood glucose levels in normoglycemic mice during the oral glucose tolerance test. Data are expressed as mean  $\pm$  SD and were analyzed using two-way ANOVA followed by Tukey's post hoc test. The letters *a*, *b*, and *c* indicate statistically significant differences at

$p < 0.05$ , where *a* denotes comparison with the normal control group, *b* with the diabetic control group, and *c* with the vildagliptin-treated group.

# **Molecular Docking**

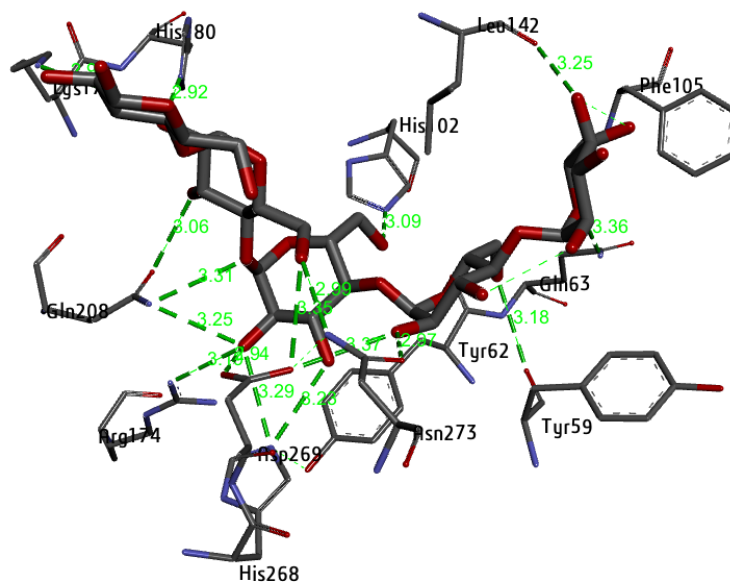

**Figure S 3.** Binding mode of co-crystallized ligand in the binding site of co-crystallized MALTOPENTAOSE in amylase active site (**PDB:1BAG**).

Validation of docking protocol was done by redocking of the bound conformer of co-crystallized Maltopentaose in amylase active site (PDB:1BAG). MALTOPENTAOSE redocked almost at the same position as the co-crystallized (docking score = -9.4 kcal/mol) employing that the docking protocol adopted in the current study is reliable to predict the binding mode of the compound under investigation

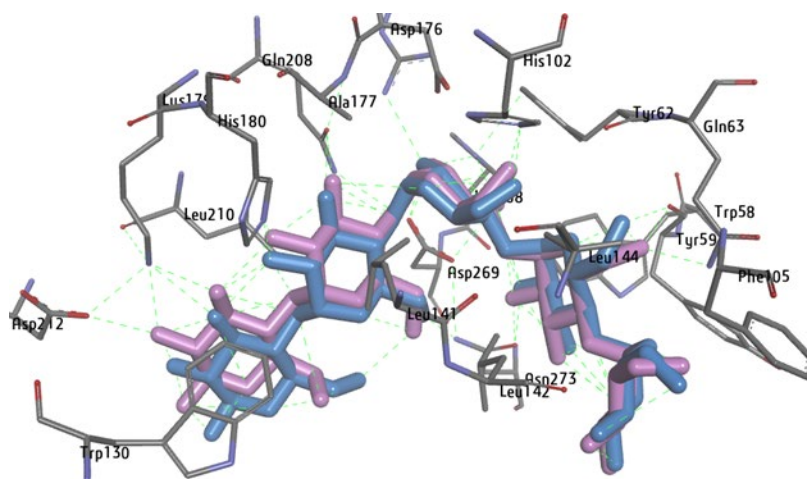

**Figure S 4.** Superimposition of co-crystallized MALTOPENTAOSE (purple) and redocked MALTOPENTAOSE (blue) for validation of docking protocol.

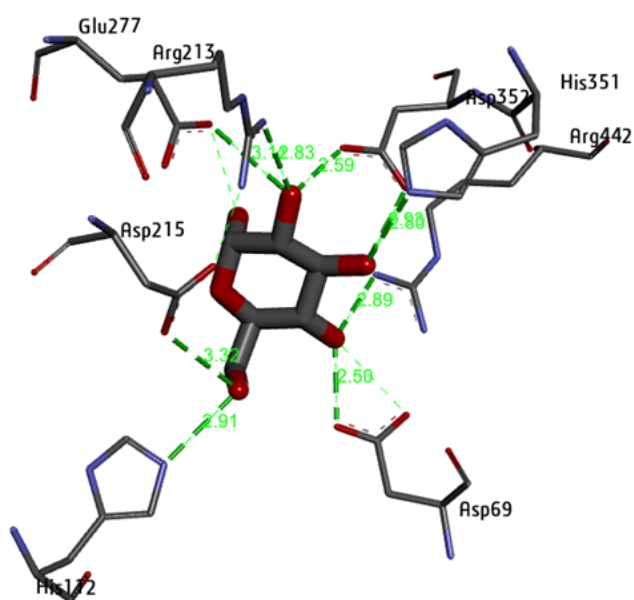

**Figure S 5.** Binding mode of co-crystallized ligand in the binding site of co-crystallized  $\alpha$ -D-Glucopyranose in glycosidase active site (PDB:3A4A).

Validation of docking protocol was done by redocking of the bound conformer of co-crystallized  $\alpha$ -D-Glucopyranose in glycosidase active site (PDB:3A4A).  $\alpha$ -D-Glucopyranose redocked almost at the same position as the co-crystallized (docking score = -5.1 kcal/mol) employing that the

docking protocol adopted in the current study is reliable to predict the binding mode of the compound under investigation.

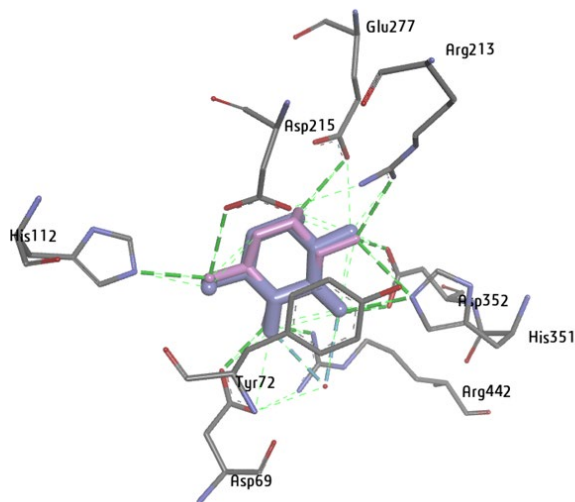

**Figure S 6.** Superimposition of co-crystallized  $\alpha$ -D-Glucopyranose (**purple**) and redocked  $\alpha$ -D-Glucopyranose (**blue**) for validation of docking protocol.

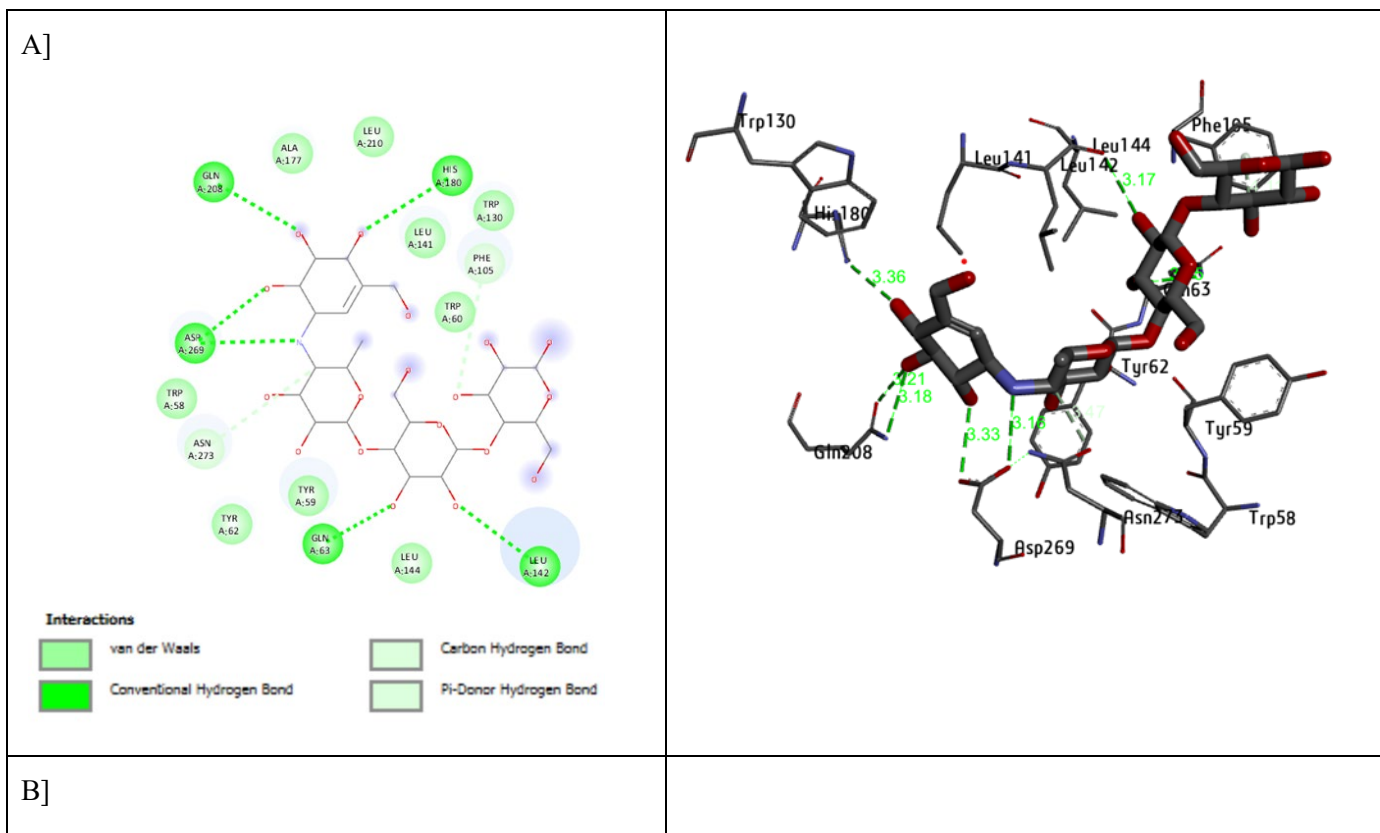

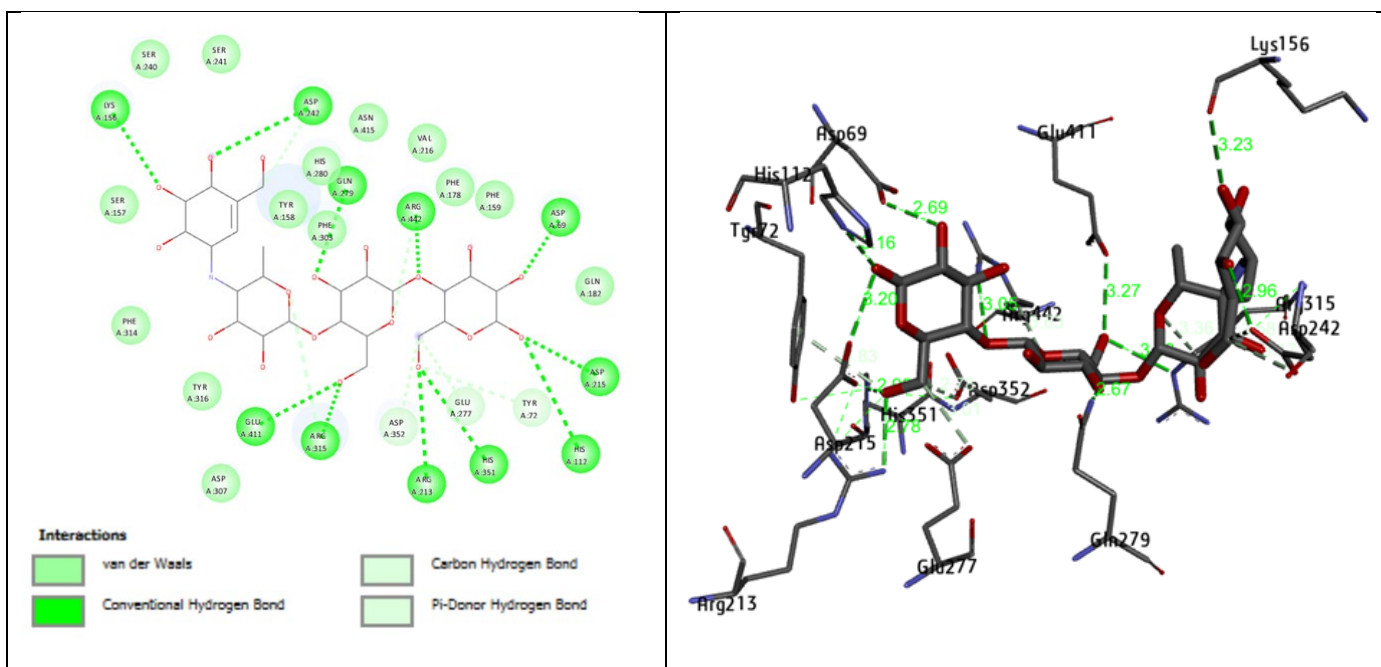

Figure S 7. A. The docking pose of Acarbose, the standard drug, against the Alpha-Amylase enzyme (PDB code 1BAG). B. The docking pose of Acarbose, the standard drug, against the Glycosidase enzyme (PDB code 3A4A).

**Table S 3.** Binding score, amino acid interaction and bond length of compounds **7g**, **10d** and **10e** within the active site of alpha-amylase and alpha glycosidase active sites.

| Compounds | Binding Score (kcal/mol) | Interaction         | Amino acid | Enzyme  | Code |
|-----------|--------------------------|---------------------|------------|---------|------|
| Acarbose  | -8.6                     | H bond              | Gln208     | Amylase | 1BAG |
|           |                          | H bond              | Asp269     |         |      |
|           |                          | H bond              | Gln63      |         |      |
|           |                          | H bond              | His180     |         |      |
|           |                          | H bond              | Leu142     |         |      |
| 7g        | -9.9                     | H. bond             | Gln63      | Amylase | 1BAG |
|           |                          | $\pi$ -anion        | Asp269     |         |      |
|           |                          | $\pi$ - $\pi$ stack | Tyr59      |         |      |
|           |                          | $\pi$ - $\pi$ stack | Phe105     |         |      |
| 10d       | -9.2                     | H. bond             | Gln63      | Amylase | 1BAG |
|           |                          | H. bond             | Asn273     |         |      |
|           |                          | $\pi$ -anion        | Asp269     |         |      |
|           |                          | $\pi$ - $\pi$ stack | Phe105     |         |      |
|           |                          | $\pi$ - $\pi$ stack | Trp58      |         |      |
|           |                          | $\pi$ - $\pi$ stack | Tyr62      |         |      |
|           |                          | $\pi$ -anion        | Asp274     |         |      |

|                 |       |                     |        |             |      |
|-----------------|-------|---------------------|--------|-------------|------|
| <b>10d</b>      | -10.2 | H. bond             | Gln63  | Amylase     | 1BAG |
|                 |       | $\pi$ - $\pi$ stack | Phe105 |             |      |
|                 |       | $\pi$ - $\pi$ stack | Trp58  |             |      |
|                 |       | $\pi$ -sigma        | Leu142 |             |      |
|                 |       | $\pi$ - $\pi$ stack | Tyr59  |             |      |
|                 |       | H. bond             | Asp274 |             |      |
|                 |       | H. bond             | His268 |             |      |
| <b>Acarbose</b> | -8.0  | H. bond             | Asp242 | glycosidase | 3A4A |
|                 |       | H. bond             | Arg442 |             |      |
|                 |       | H. bond             | Gln279 |             |      |
|                 |       | H. bond             | His351 |             |      |
|                 |       | H. bond             | Arg315 |             |      |
|                 |       | H. bond             | Arg213 |             |      |
|                 |       | H. bond             | Asp69  |             |      |
|                 |       | H. bond             | Asp215 |             |      |
| <b>10d</b>      | -9.4  | $\pi$ - $\pi$ stack | Tyr158 | glycosidase | 3A4A |
|                 |       | H. bond             | Gln279 |             |      |
|                 |       | H. bond             | Asp352 |             |      |
|                 |       | $\pi$ - $\pi$ stack | Phe178 |             |      |
|                 |       | $\pi$ - $\pi$ stack | Tyr72  |             |      |
|                 |       | $\pi$ -anion        | Asp69  |             |      |
|                 |       | $\pi$ -anion        | Asp215 |             |      |

# **Virtual ADMET Studies**

Table S 4: ProTox-III properties of the newly synthesized derivatives **8g**, **12d**, and **12e**.

| Compound | ProTox-III                                                                                                                                                                                                                                                                                                                                                                                                                                                                                                                                                                                                                                                                                                                                                                                                                                                                                                                                                                                                                                                                                                                                                                                                                                                                                                                                                                                                                    |
|----------|-------------------------------------------------------------------------------------------------------------------------------------------------------------------------------------------------------------------------------------------------------------------------------------------------------------------------------------------------------------------------------------------------------------------------------------------------------------------------------------------------------------------------------------------------------------------------------------------------------------------------------------------------------------------------------------------------------------------------------------------------------------------------------------------------------------------------------------------------------------------------------------------------------------------------------------------------------------------------------------------------------------------------------------------------------------------------------------------------------------------------------------------------------------------------------------------------------------------------------------------------------------------------------------------------------------------------------------------------------------------------------------------------------------------------------|
| 8g       | <div style="display: flex; align-items: center;"> <div style="flex: 1; text-align: center;"> 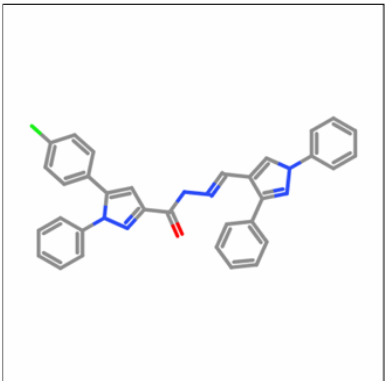 </div> <div style="flex: 2;"> <p>Predicted LD50: 500mg/kg</p> <p>Predicted Toxicity Class: 4</p> <div style="display: flex; justify-content: center; gap: 5px;"> <div style="width: 15px; height: 15px; background-color: red; border: 1px solid black;"></div> <div style="width: 15px; height: 15px; background-color: orange; border: 1px solid black;"></div> <div style="width: 15px; height: 15px; background-color: yellow; border: 1px solid black;"></div> <div style="width: 15px; height: 15px; background-color: lightgreen; border: 1px solid black;"></div> <div style="width: 15px; height: 15px; background-color: green; border: 1px solid black;"></div> </div> <p>Average similarity: 49.51%</p> <p>Prediction accuracy: 54.26%</p> <div style="display: flex; justify-content: center; gap: 5px;"> <div style="width: 20px; height: 15px; background-color: lightgreen;"></div> </div> </div> </div>   |
| 12d      | <div style="display: flex; align-items: center;"> <div style="flex: 1; text-align: center;">  </div> <div style="flex: 2;"> <p>Predicted LD50: 500mg/kg</p> <p>Predicted Toxicity Class: 4</p> <div style="display: flex; justify-content: center; gap: 5px;"> <div style="width: 15px; height: 15px; background-color: red; border: 1px solid black;"></div> <div style="width: 15px; height: 15px; background-color: orange; border: 1px solid black;"></div> <div style="width: 15px; height: 15px; background-color: yellow; border: 1px solid black;"></div> <div style="width: 15px; height: 15px; background-color: lightgreen; border: 1px solid black;"></div> <div style="width: 15px; height: 15px; background-color: green; border: 1px solid black;"></div> </div> <p>Average similarity: 45.93%</p> <p>Prediction accuracy: 54.26%</p> <div style="display: flex; justify-content: center; gap: 5px;"> <div style="width: 20px; height: 15px; background-color: lightgreen;"></div> </div> </div> </div>  |
| 12e      | <div style="display: flex; align-items: center;"> <div style="flex: 1; text-align: center;">  </div> <div style="flex: 2;"> <p>Predicted LD50: 500mg/kg</p> <p>Predicted Toxicity Class: 4</p> <div style="display: flex; justify-content: center; gap: 5px;"> <div style="width: 15px; height: 15px; background-color: red; border: 1px solid black;"></div> <div style="width: 15px; height: 15px; background-color: orange; border: 1px solid black;"></div> <div style="width: 15px; height: 15px; background-color: yellow; border: 1px solid black;"></div> <div style="width: 15px; height: 15px; background-color: lightgreen; border: 1px solid black;"></div> <div style="width: 15px; height: 15px; background-color: green; border: 1px solid black;"></div> </div> <p>Average similarity: 44.51%</p> <p>Prediction accuracy: 54.26%</p> <div style="display: flex; justify-content: center; gap: 5px;"> <div style="width: 20px; height: 15px; background-color: lightgreen;"></div> </div> </div> </div> |

# **$^1\text{H}$ NMR and $^{13}\text{C}$ NMR Spectra**

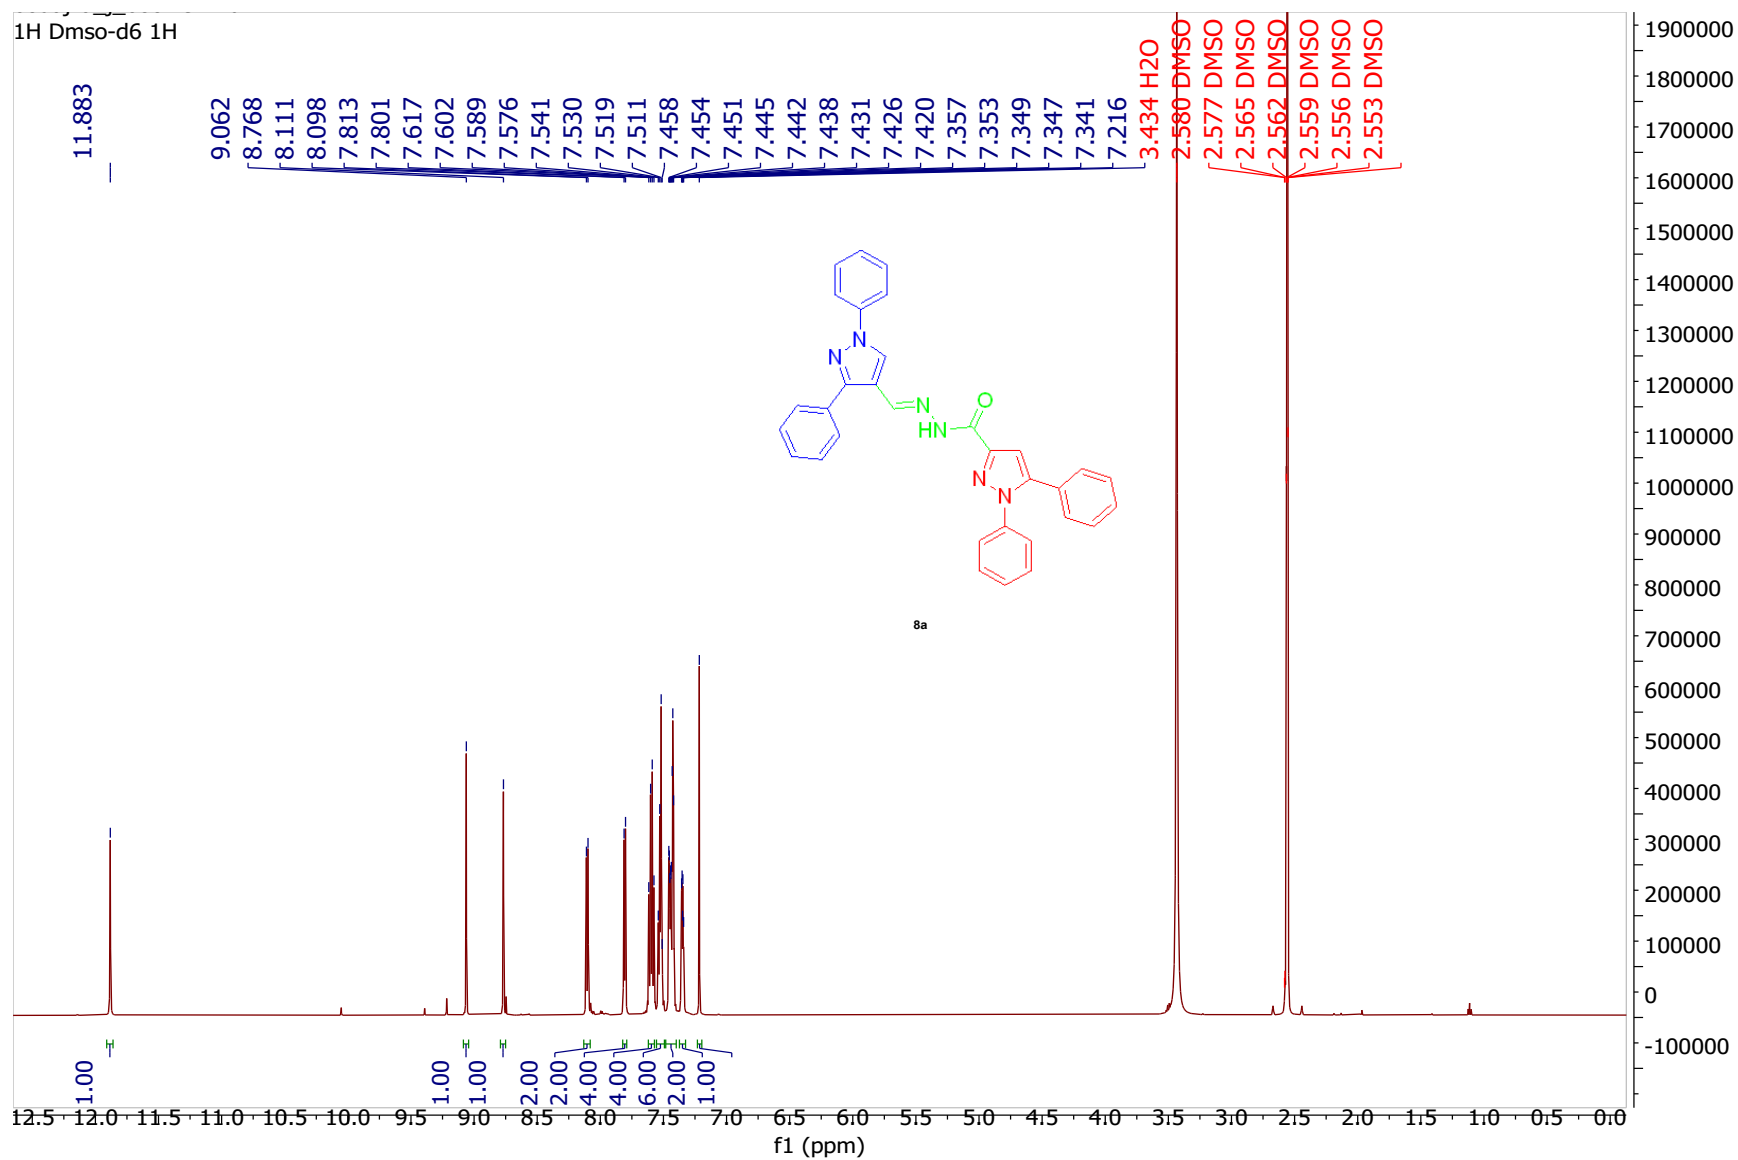

Figure S 8. <sup>1</sup>H NMR of compound **8a**

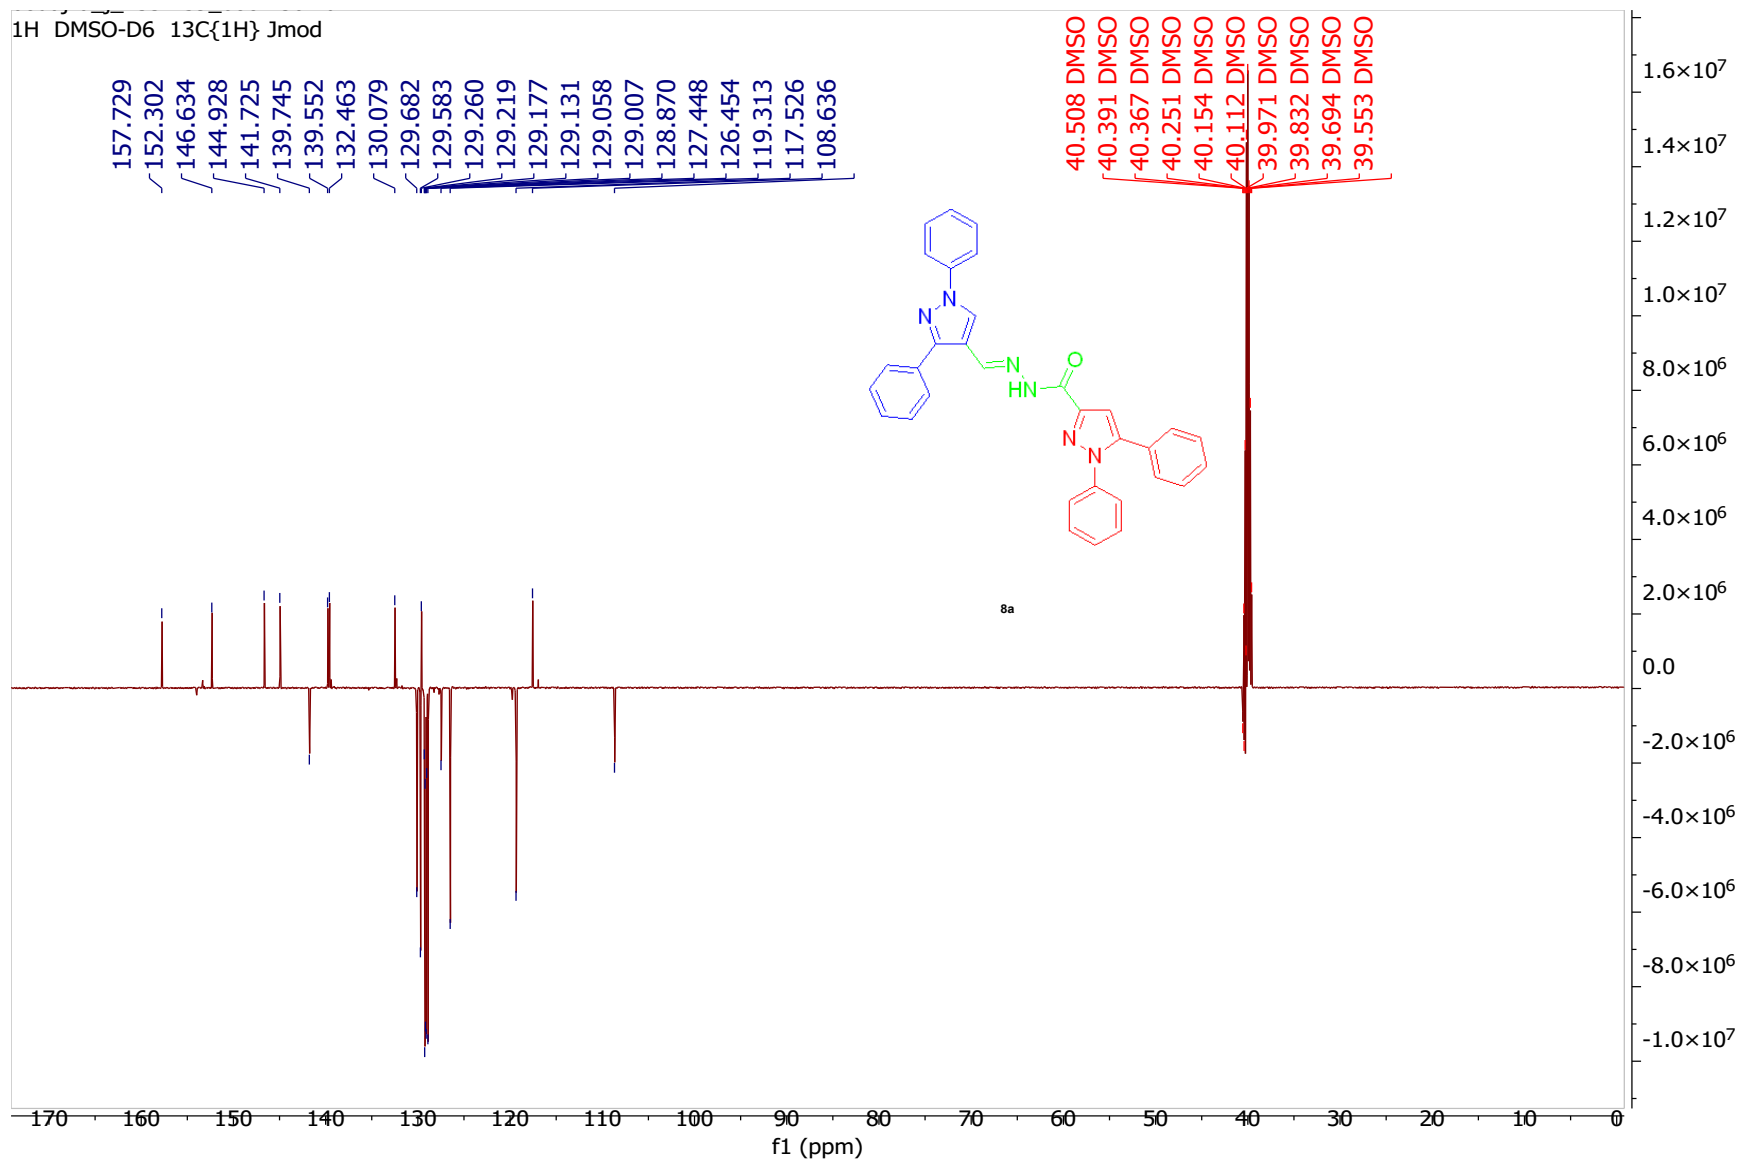

Figure S 9.  $^{13}\text{C}$  NMR of compound **8a**

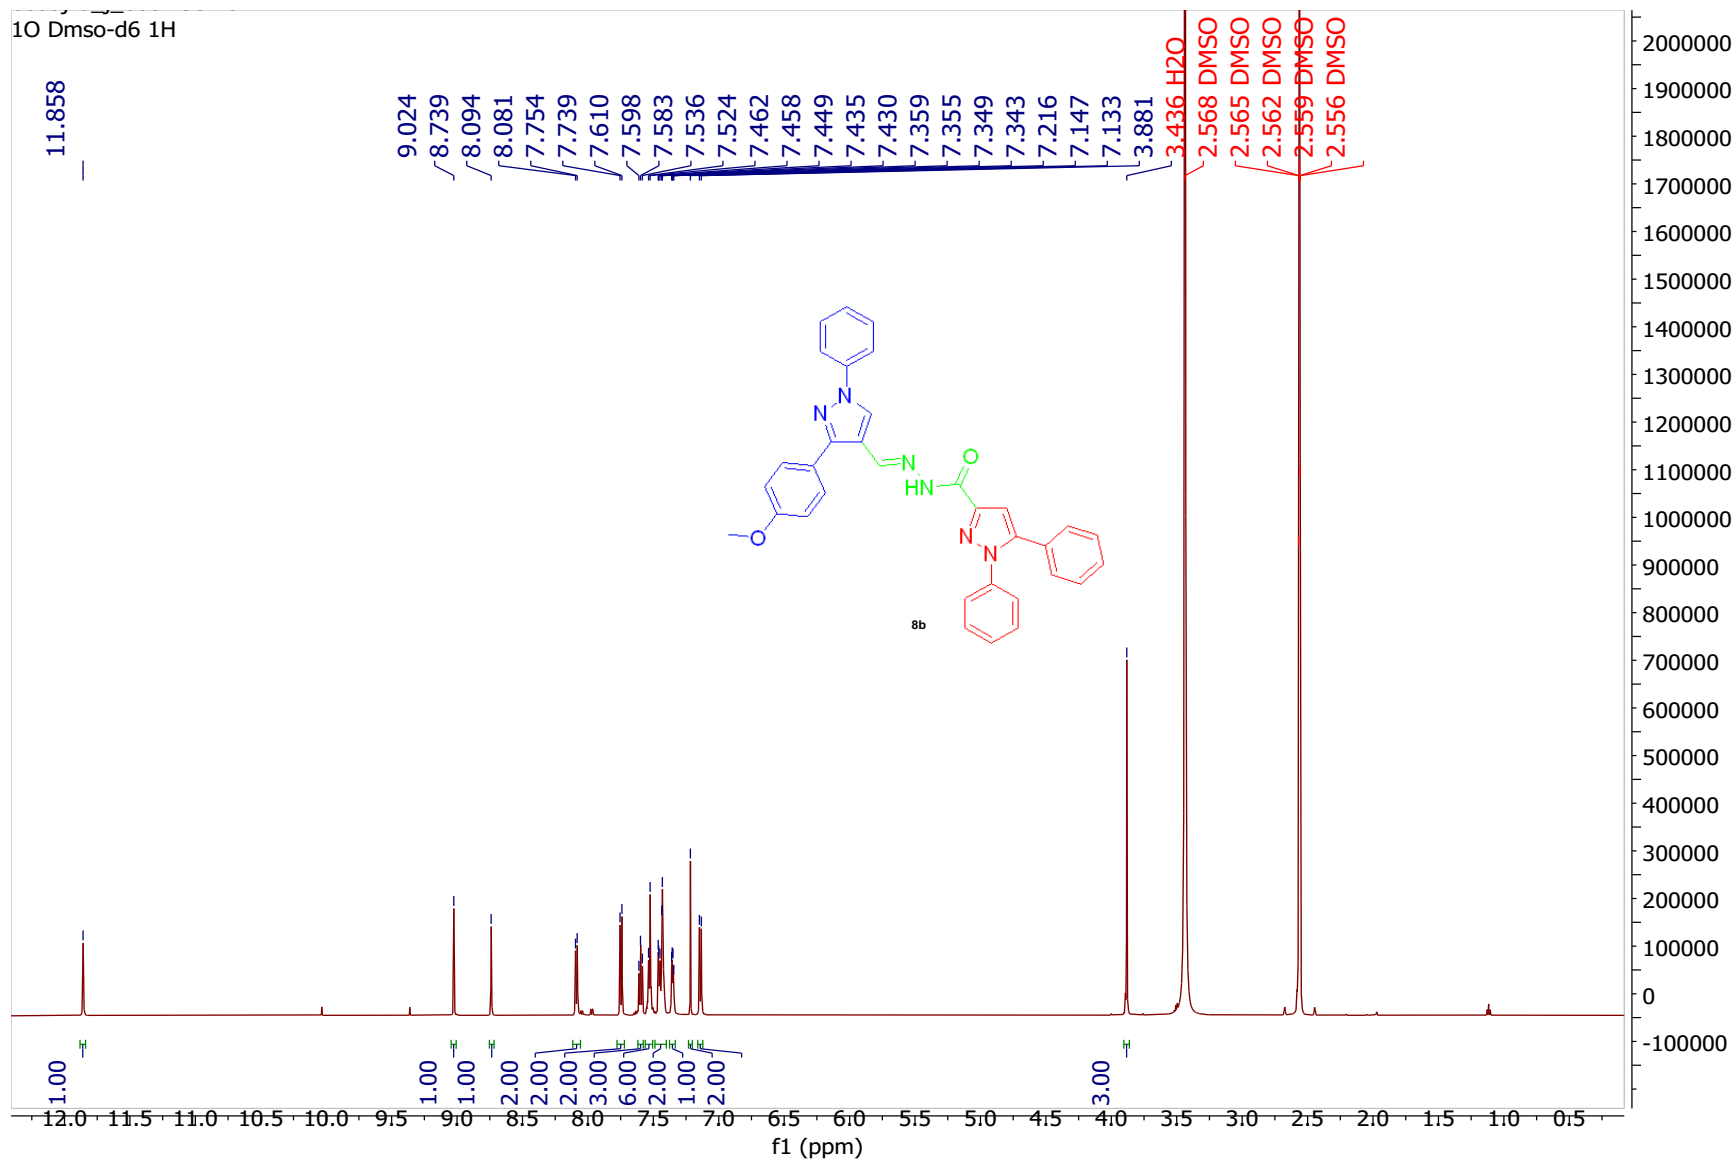

Figure S 10. <sup>1</sup>H NMR of compound **8b**

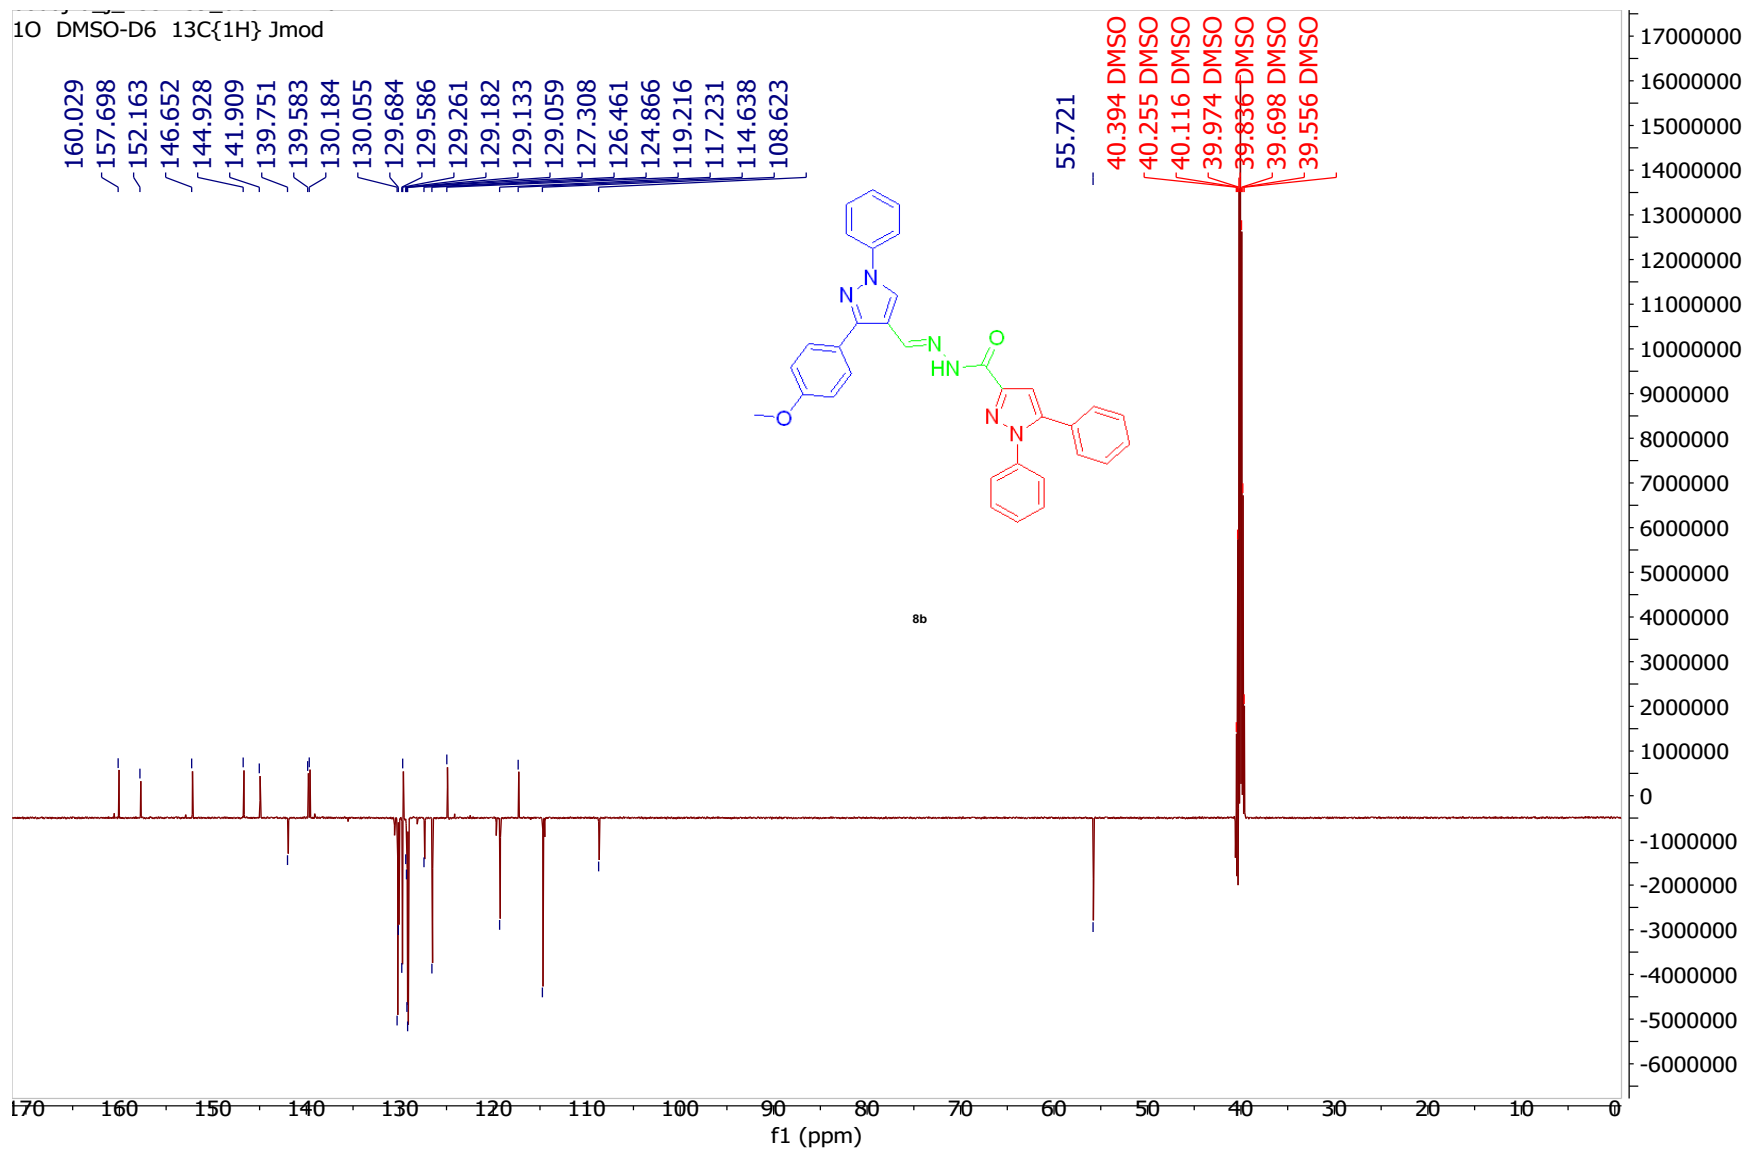

Figure S 11.  $^{13}\text{C}$  NMR of compound **8b**

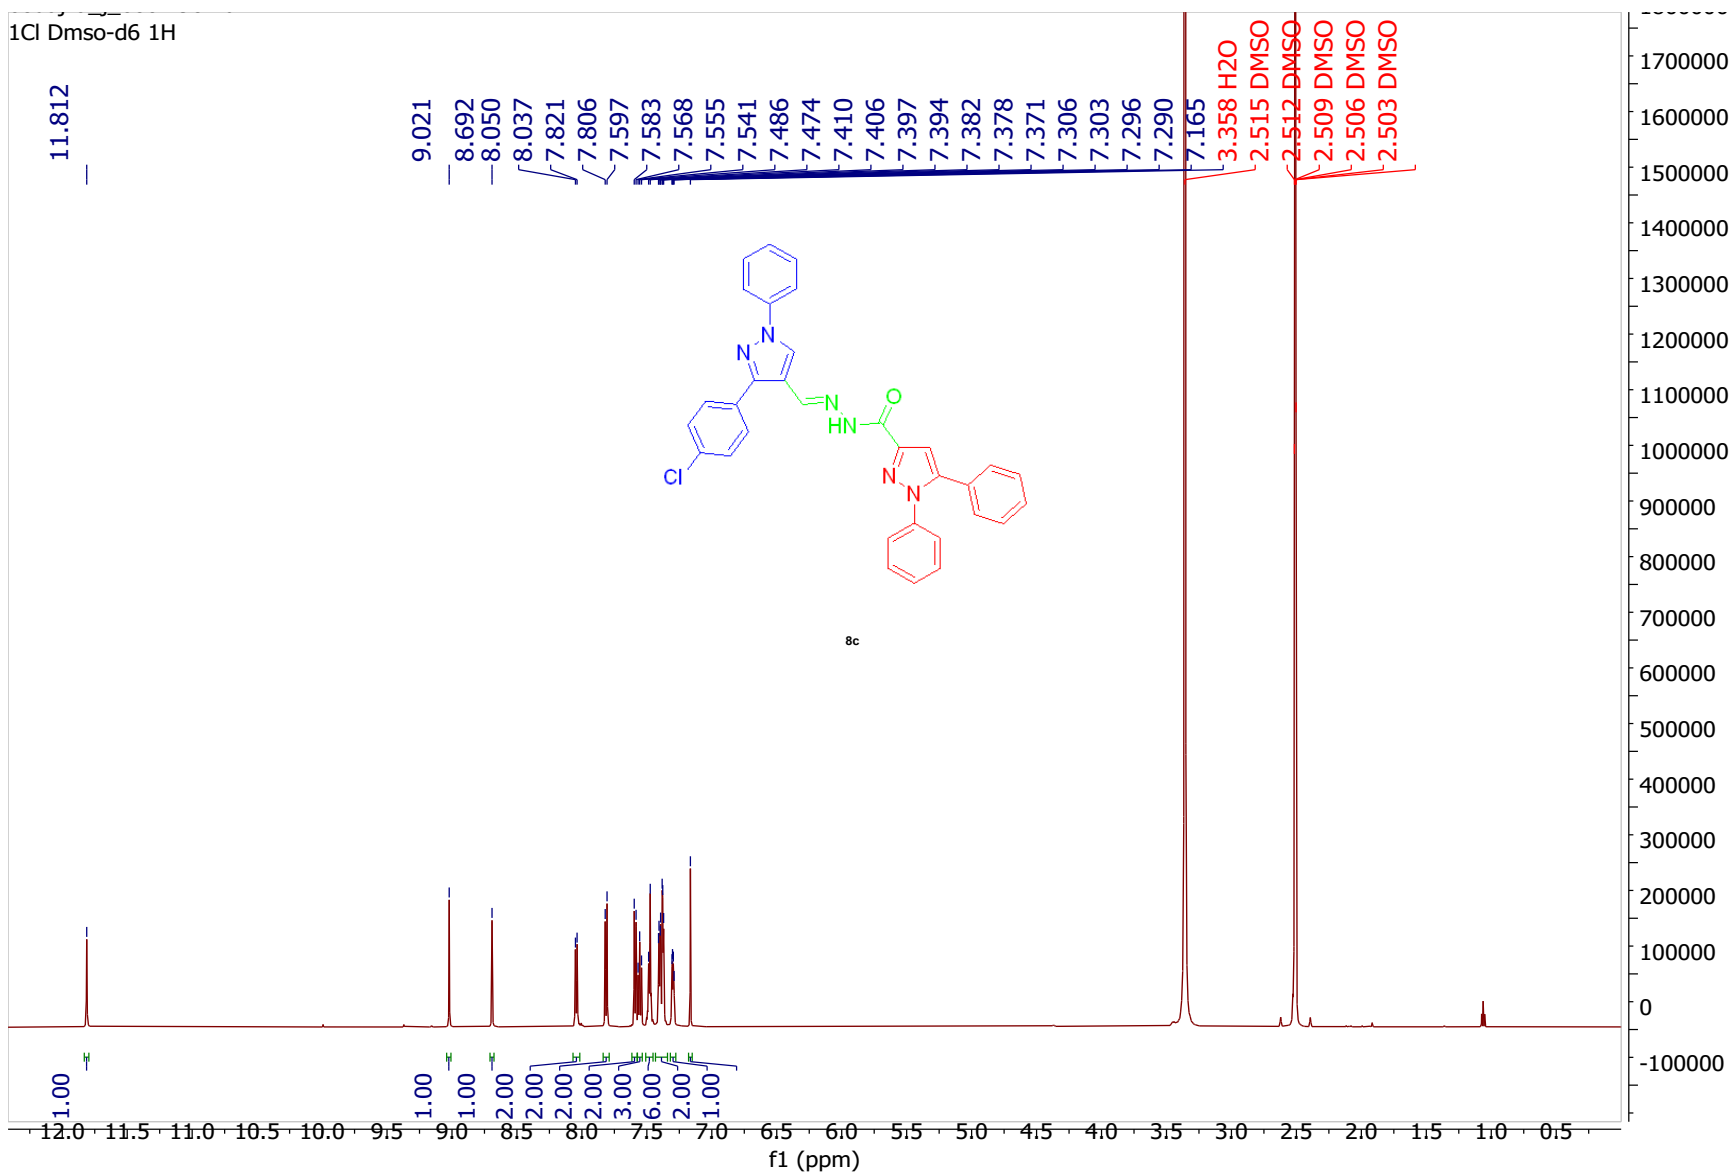

Figure S 12. <sup>1</sup>H NMR of compound **8c**

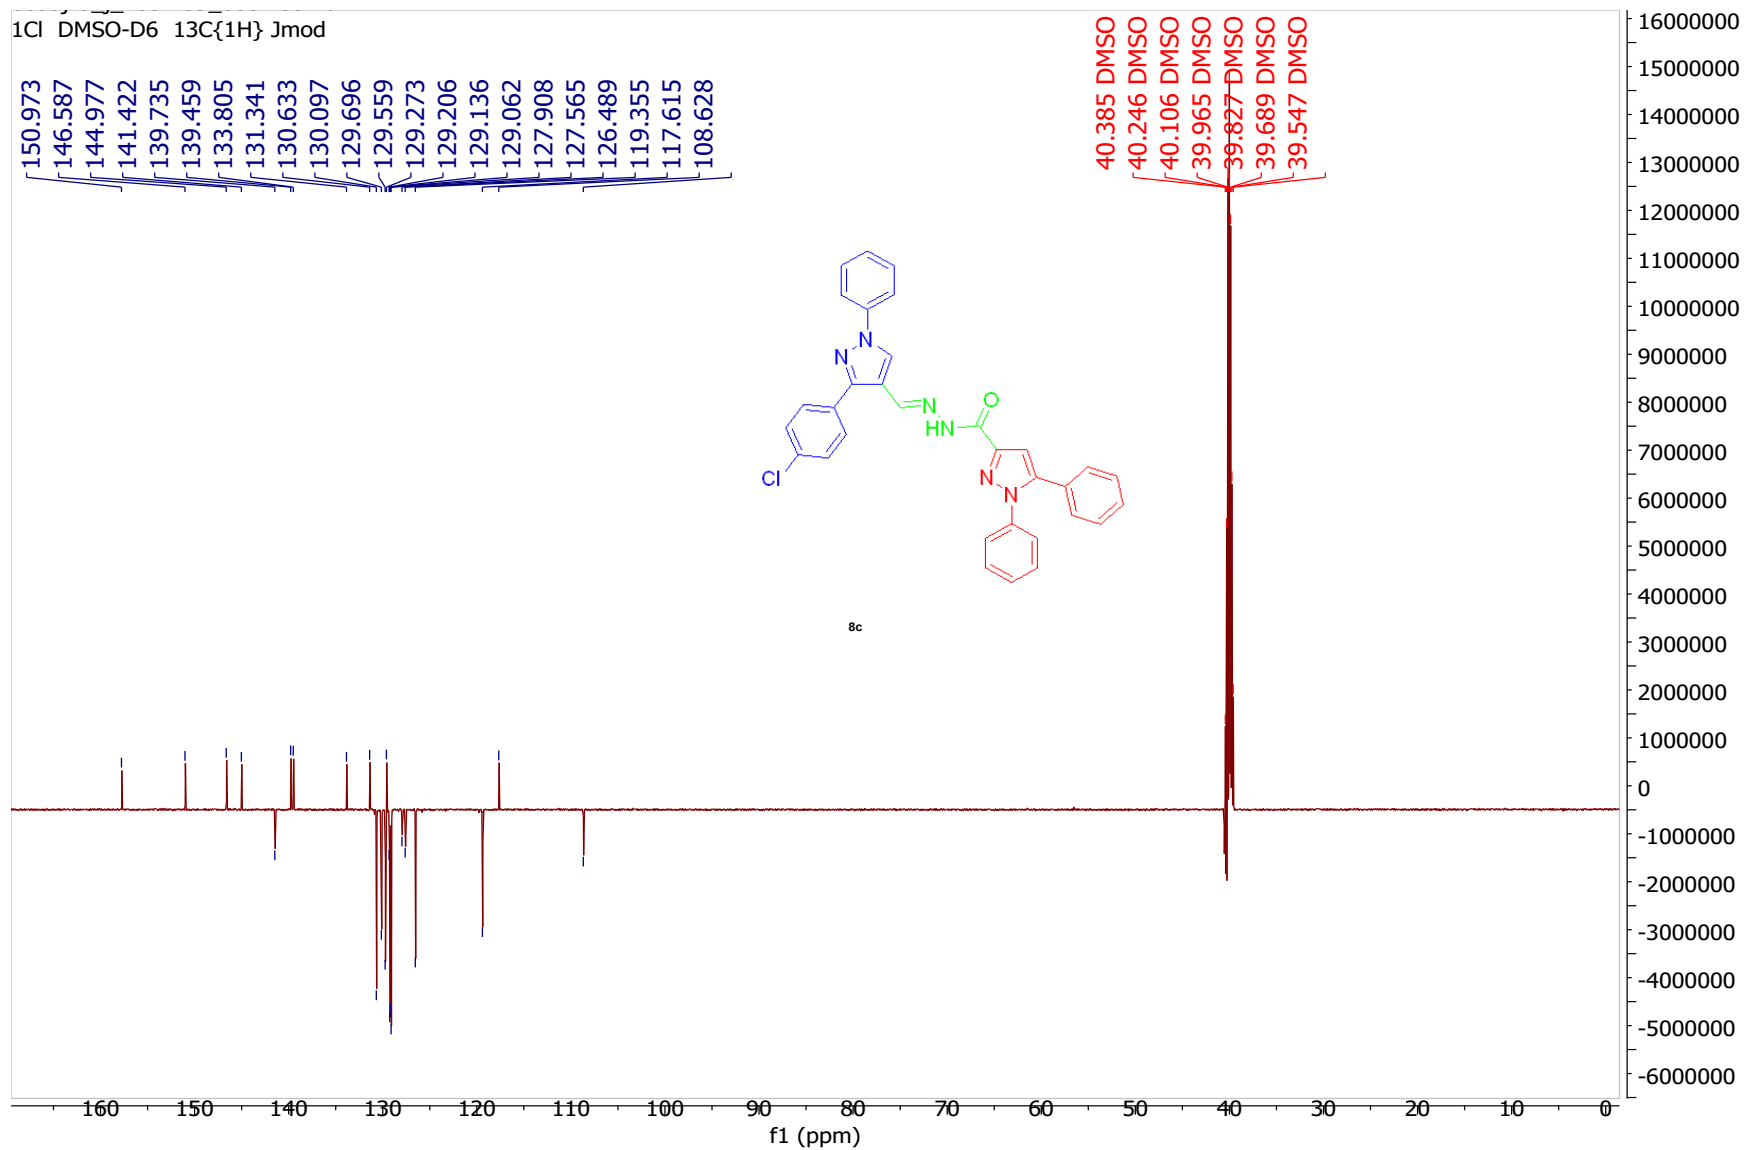

Figure S 13.  $^{13}\text{C}$  NMR of compound **8c**

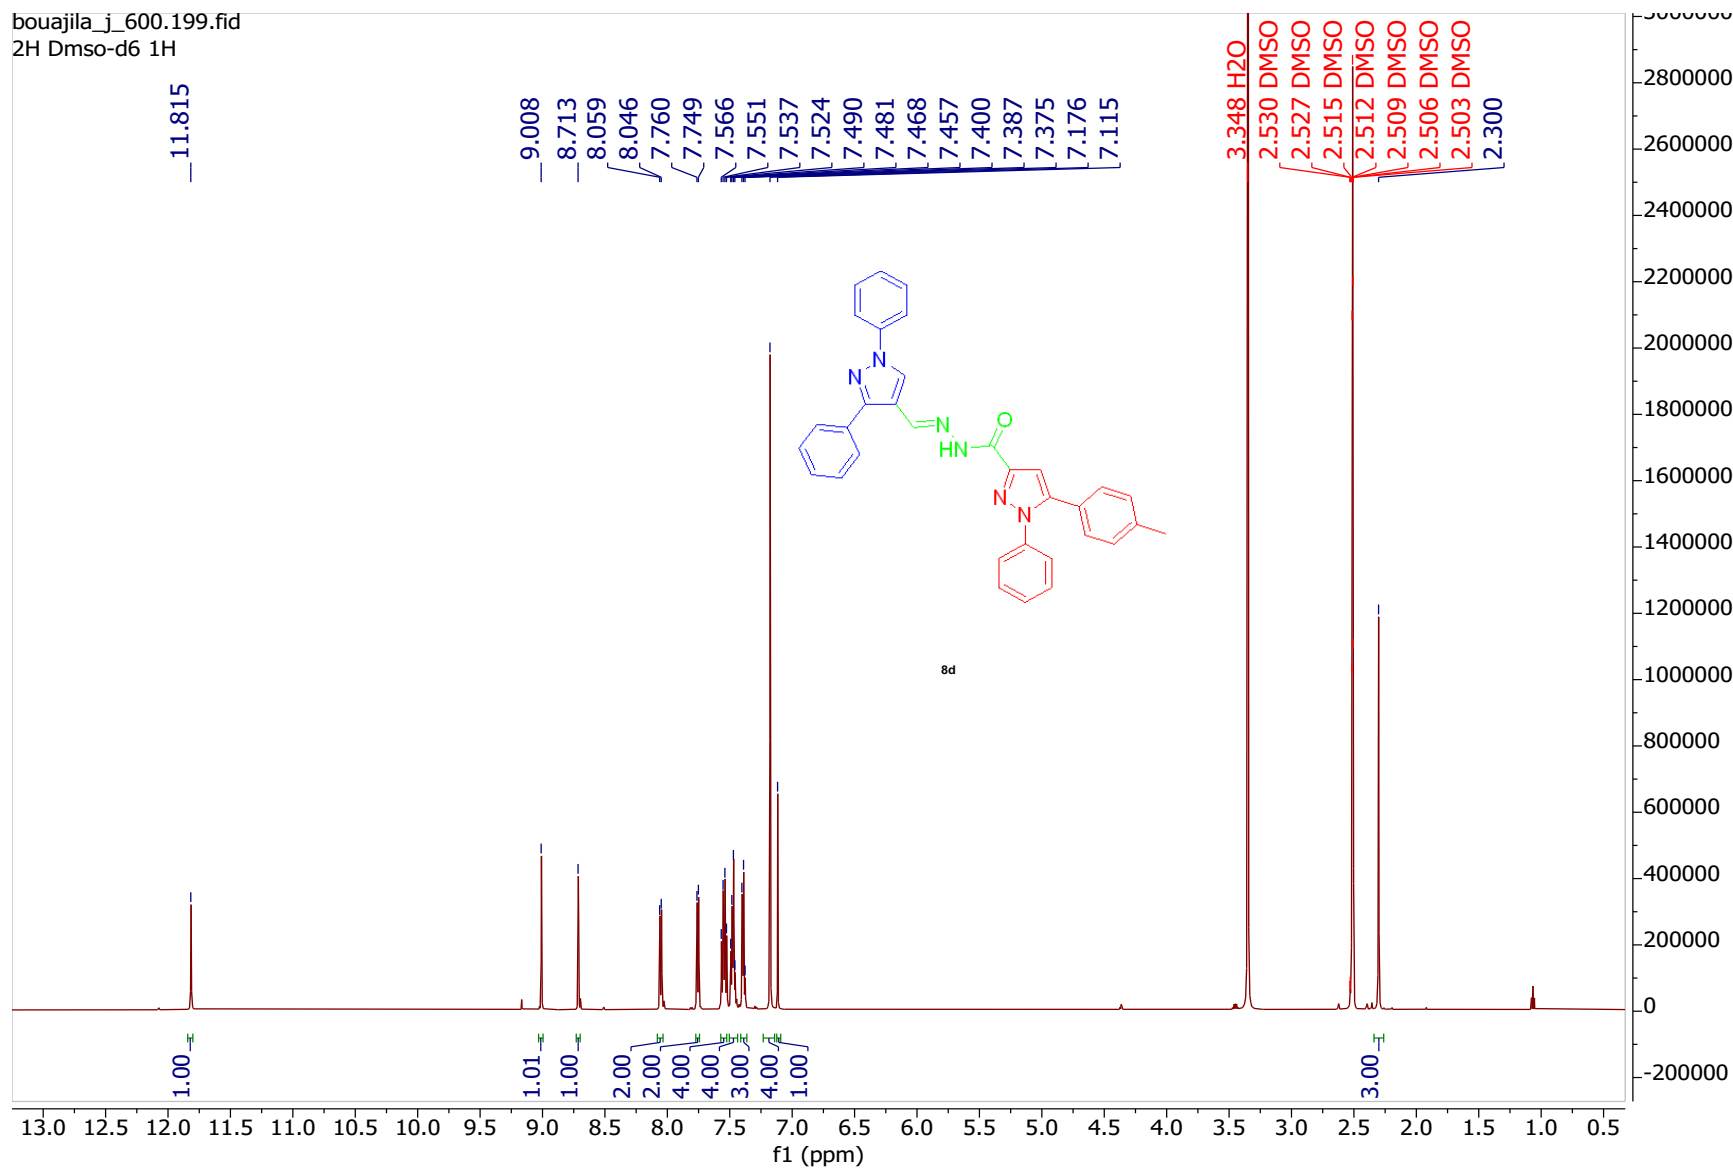

Figure S 14. <sup>1</sup>H NMR of compound **8d**

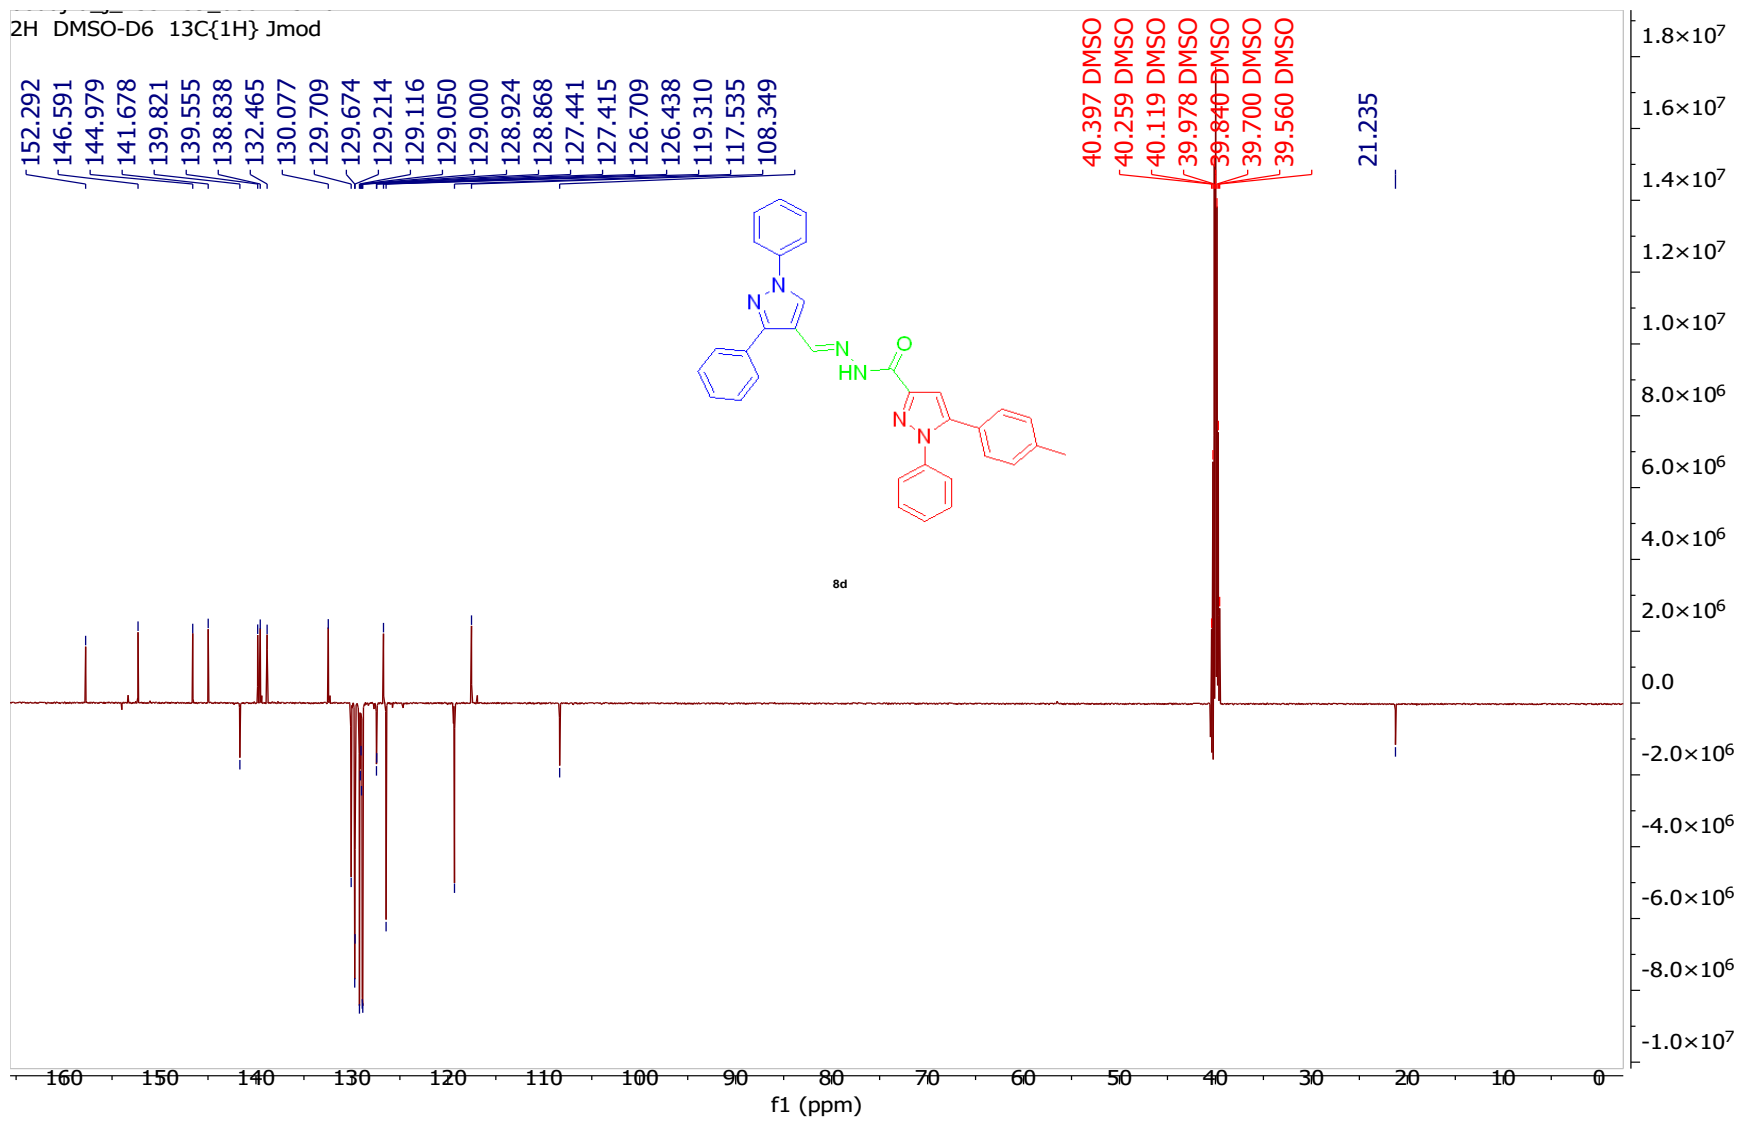

Figure S 15.. <sup>13</sup>C NMR of compound 8d

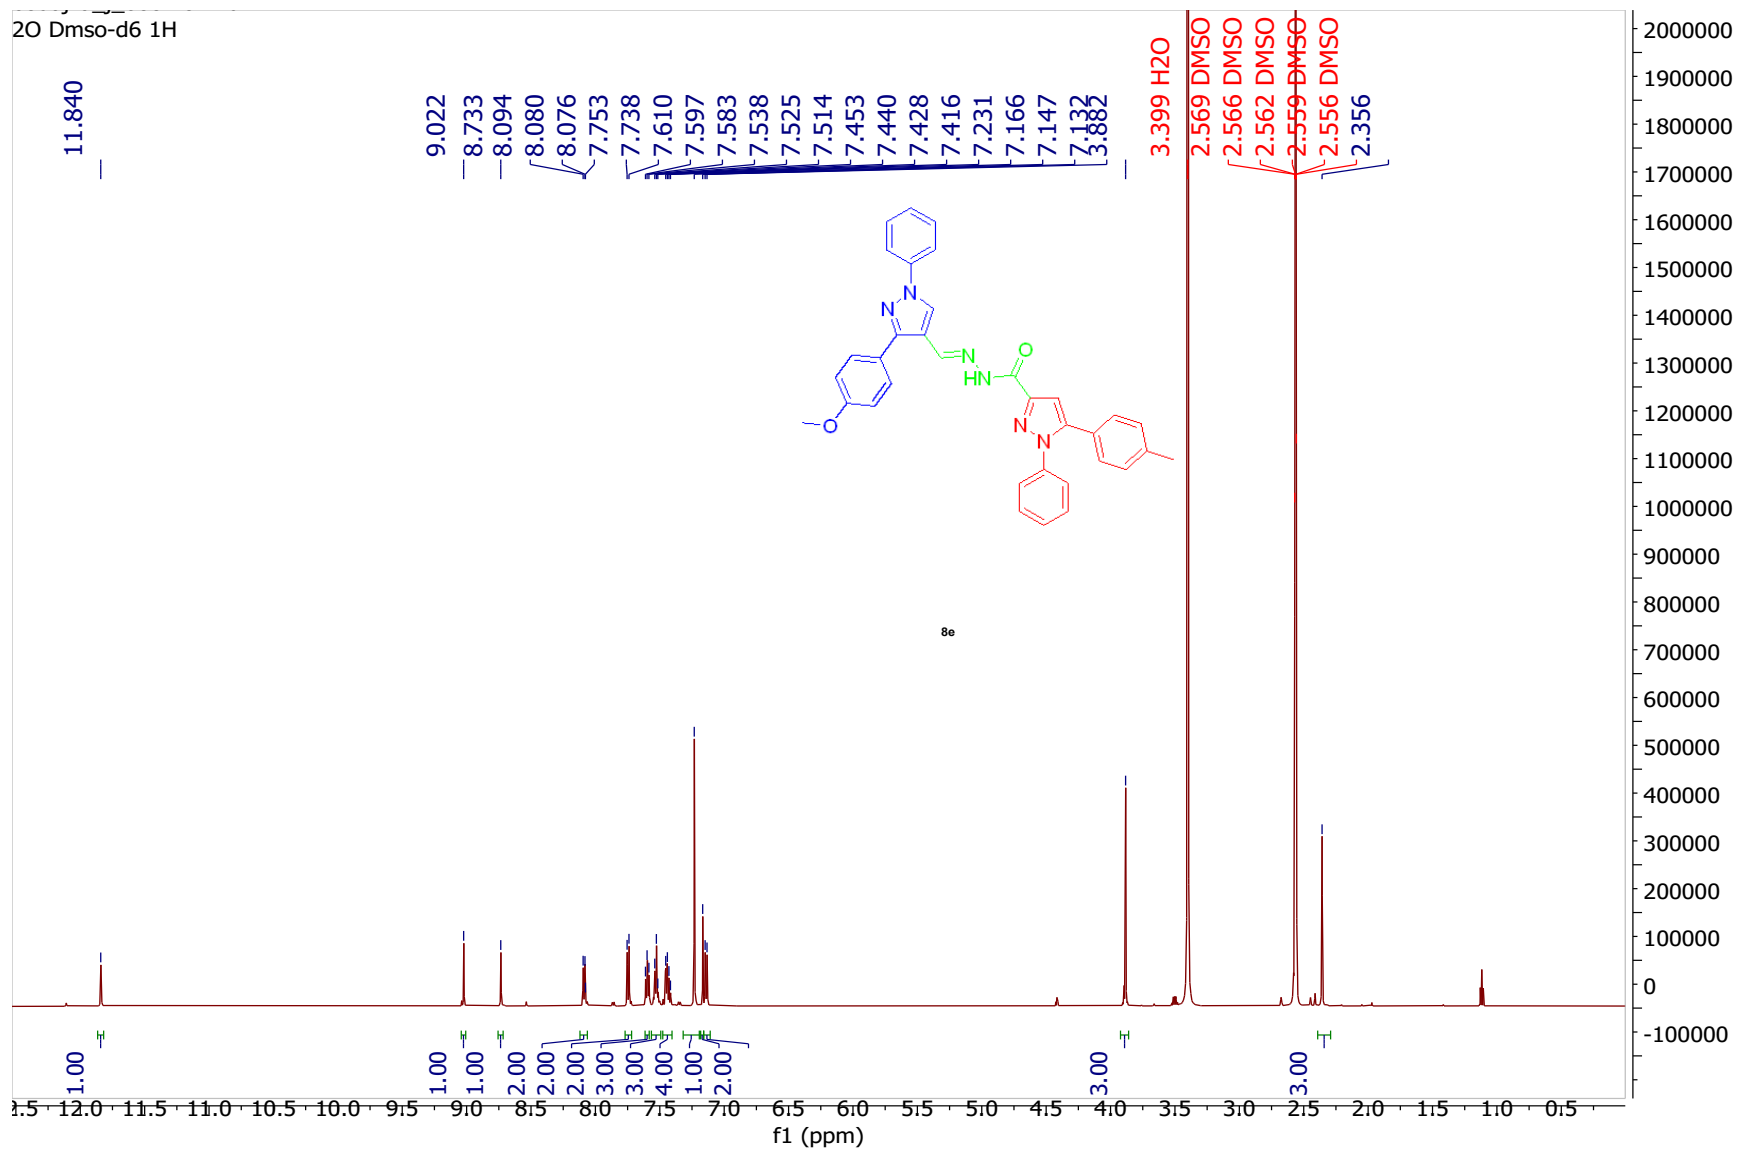

Figure S 16.  $^1\text{H}$  NMR of compound **8e**

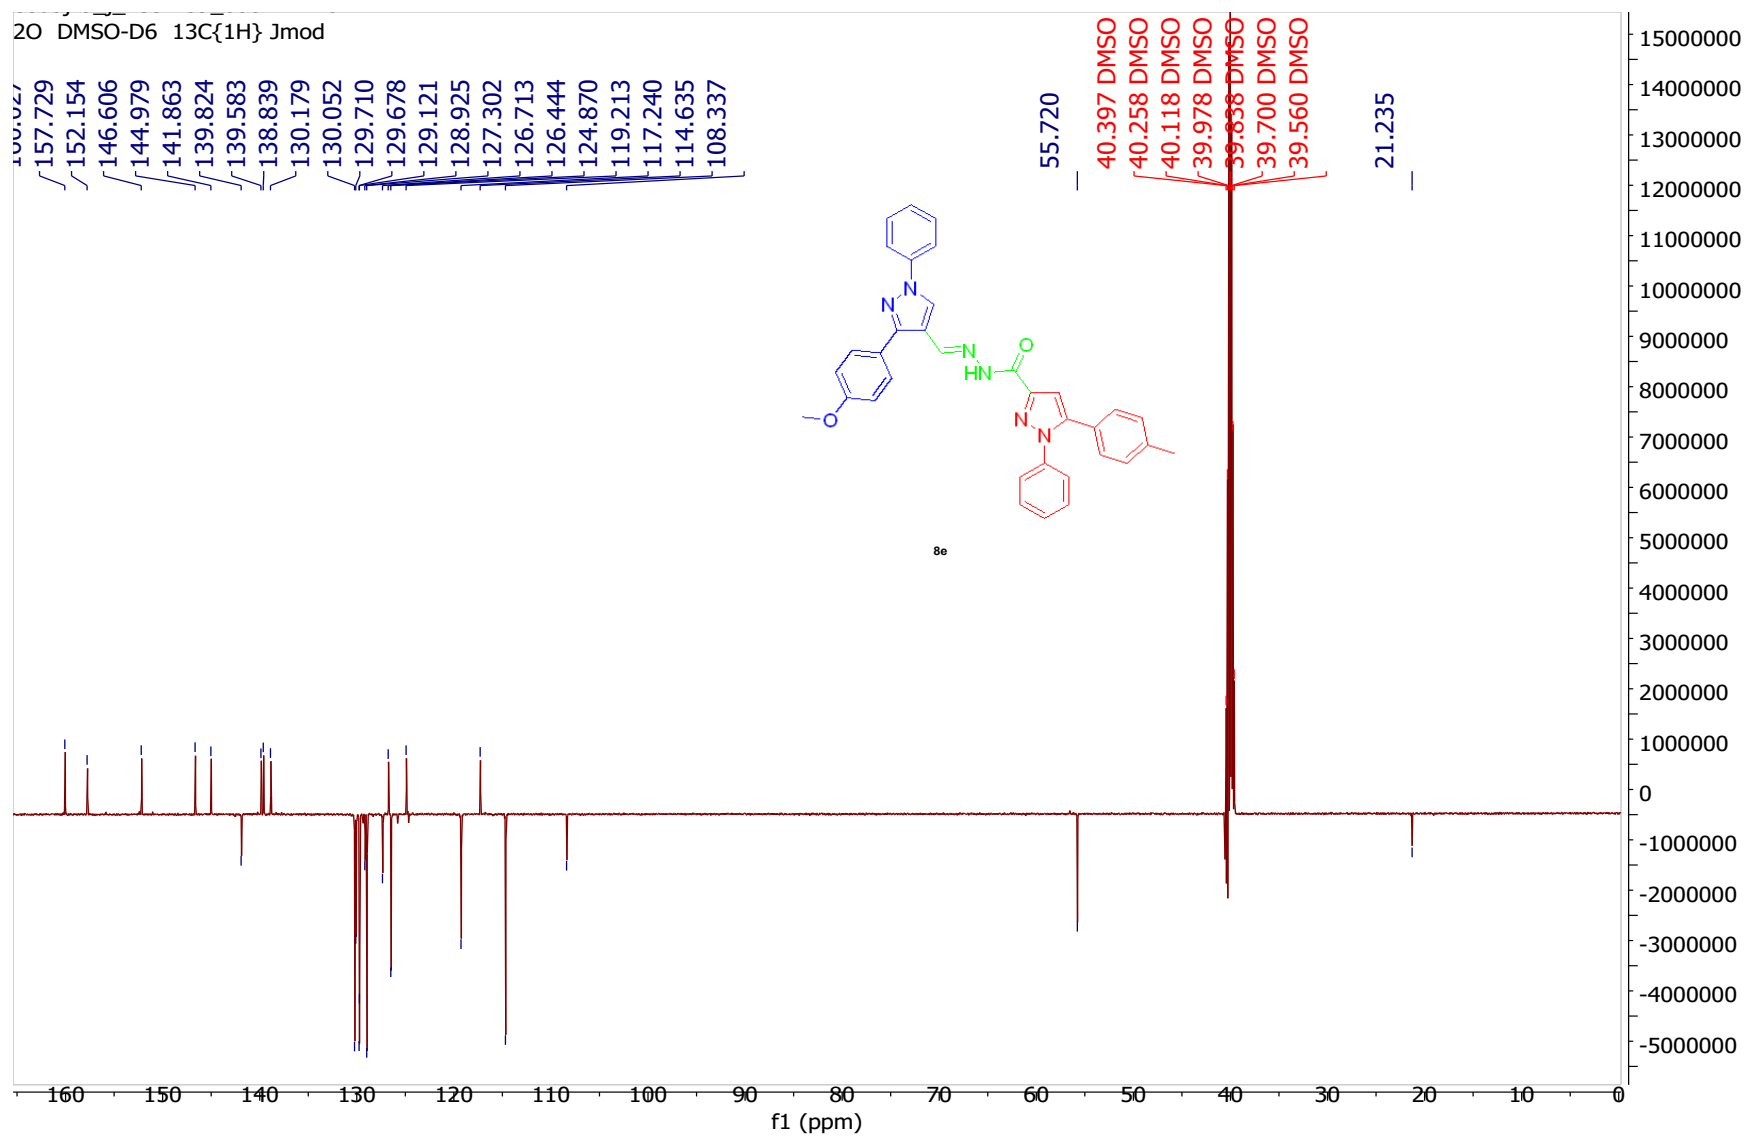

Figure S 17..n  $^{13}\text{C}$  NMR of compound **8e**

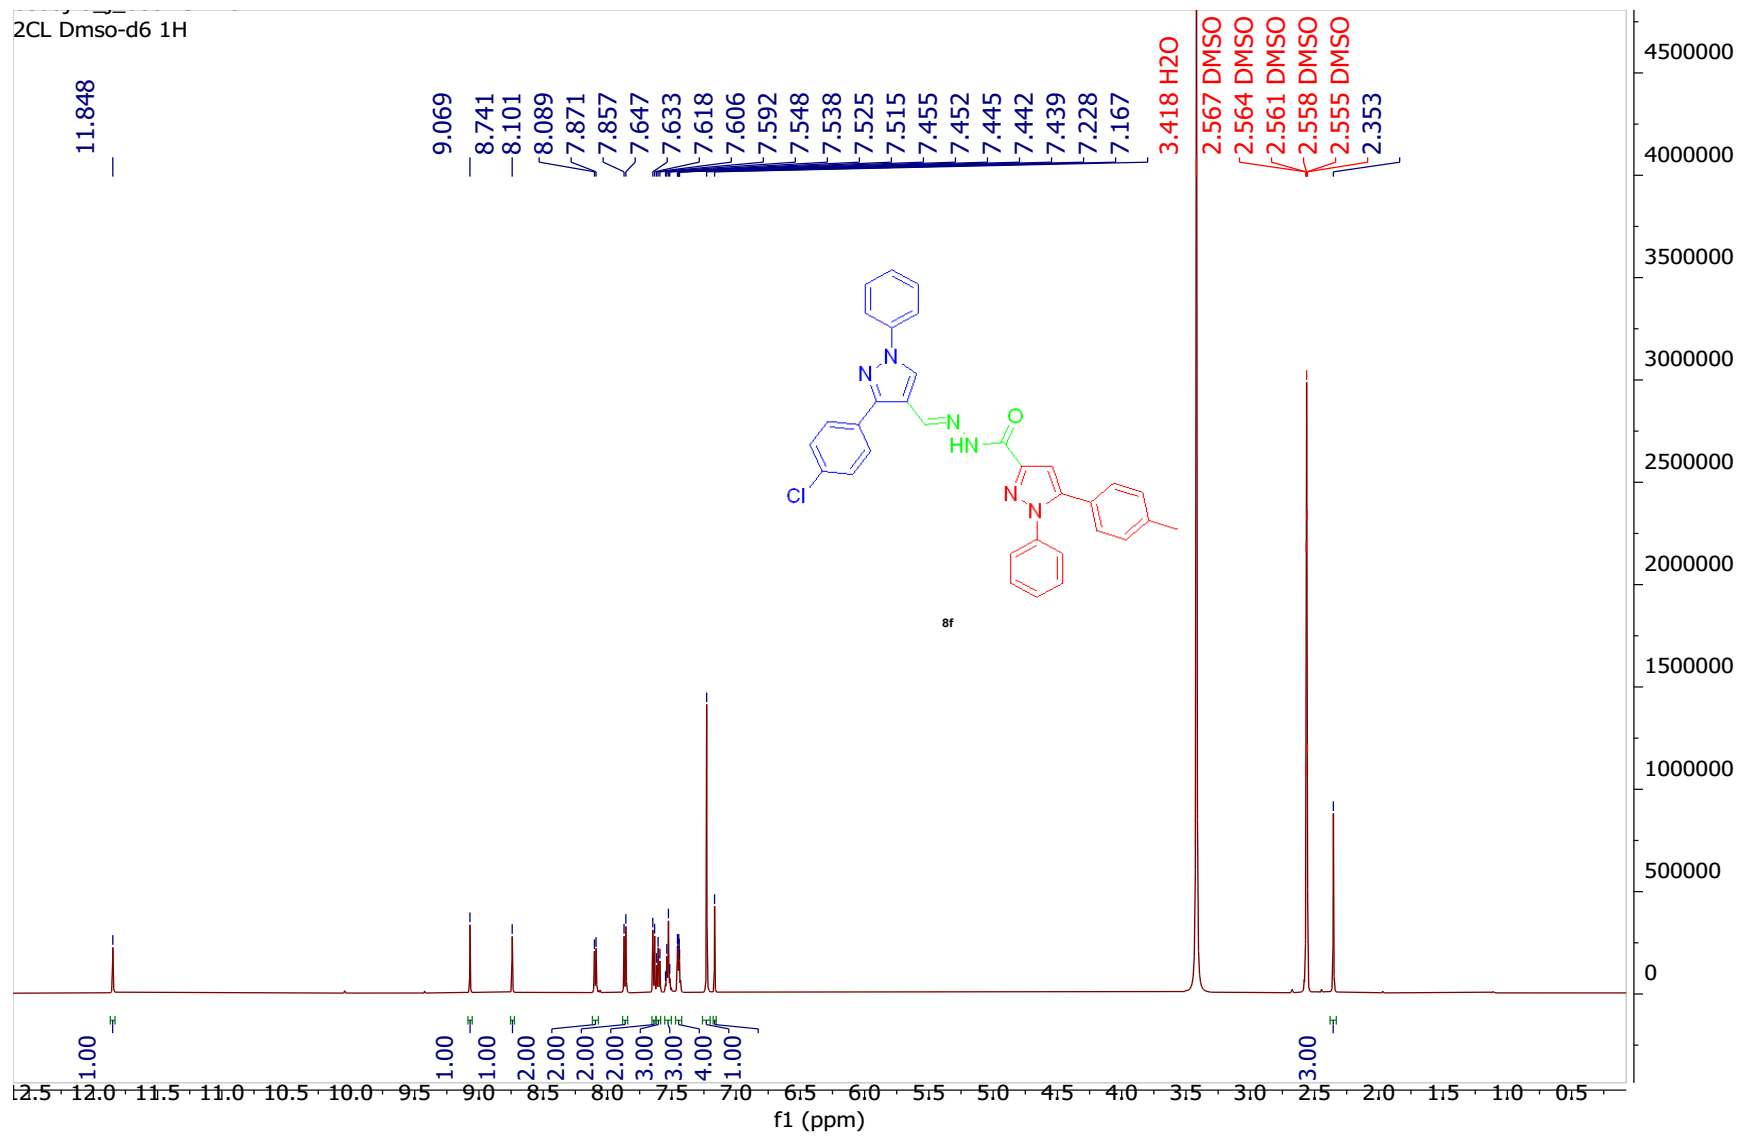

Figure S 18. <sup>1</sup>H NMR of compound **8f**

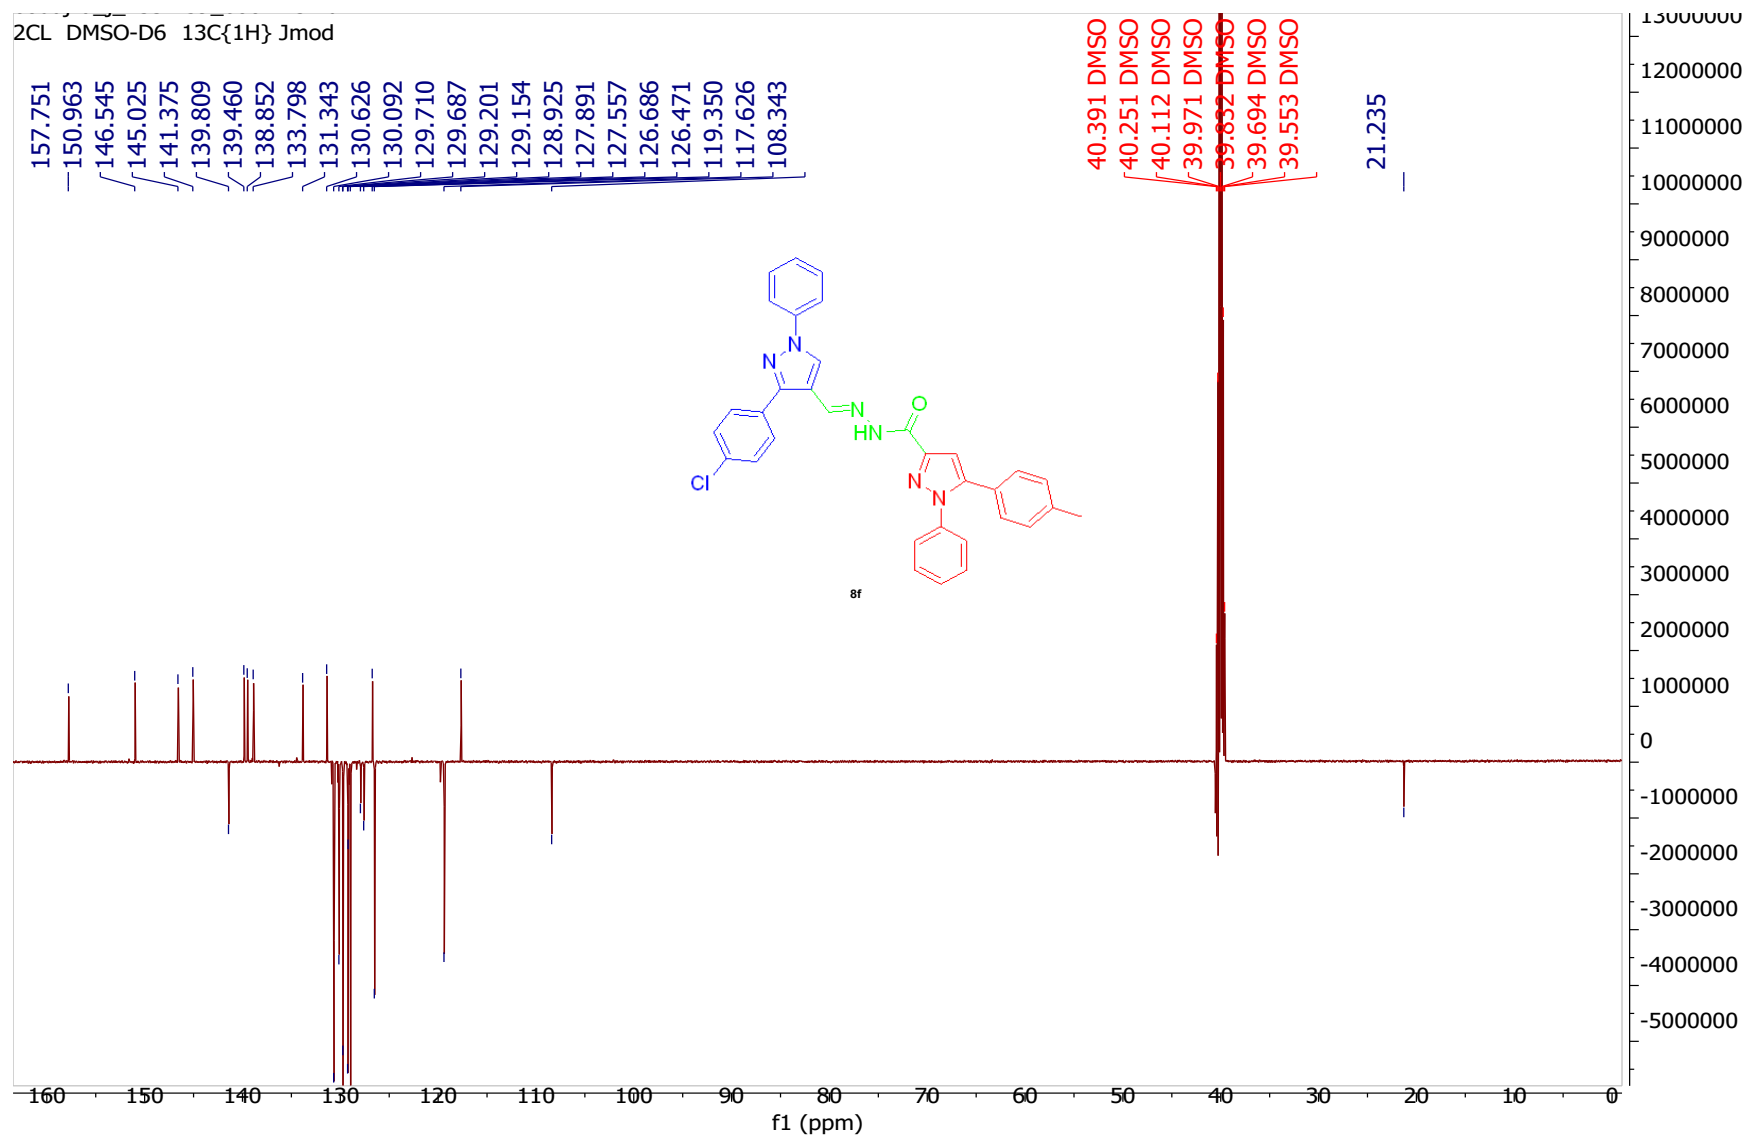

Figure S 19..  $^{13}\text{C}$  NMR of compound 8f

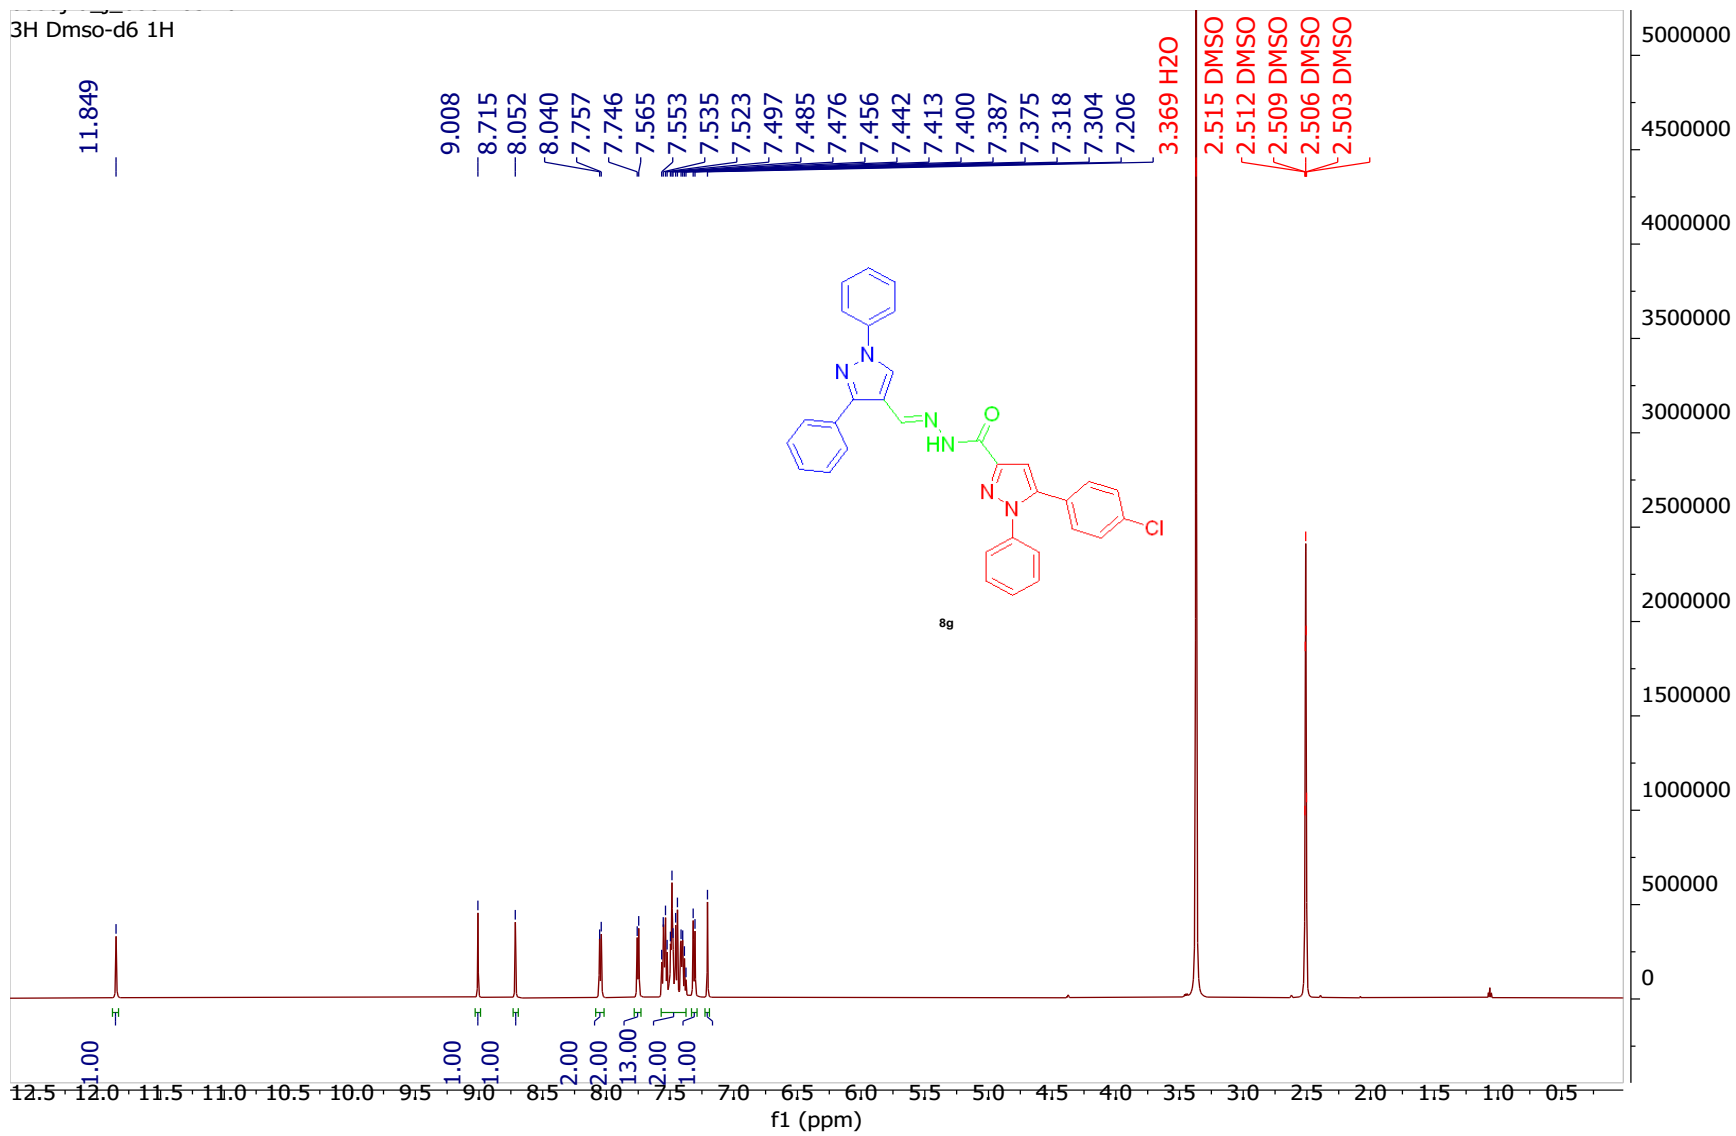

Figure S 20. <sup>1</sup>H NMR of compound **8g**

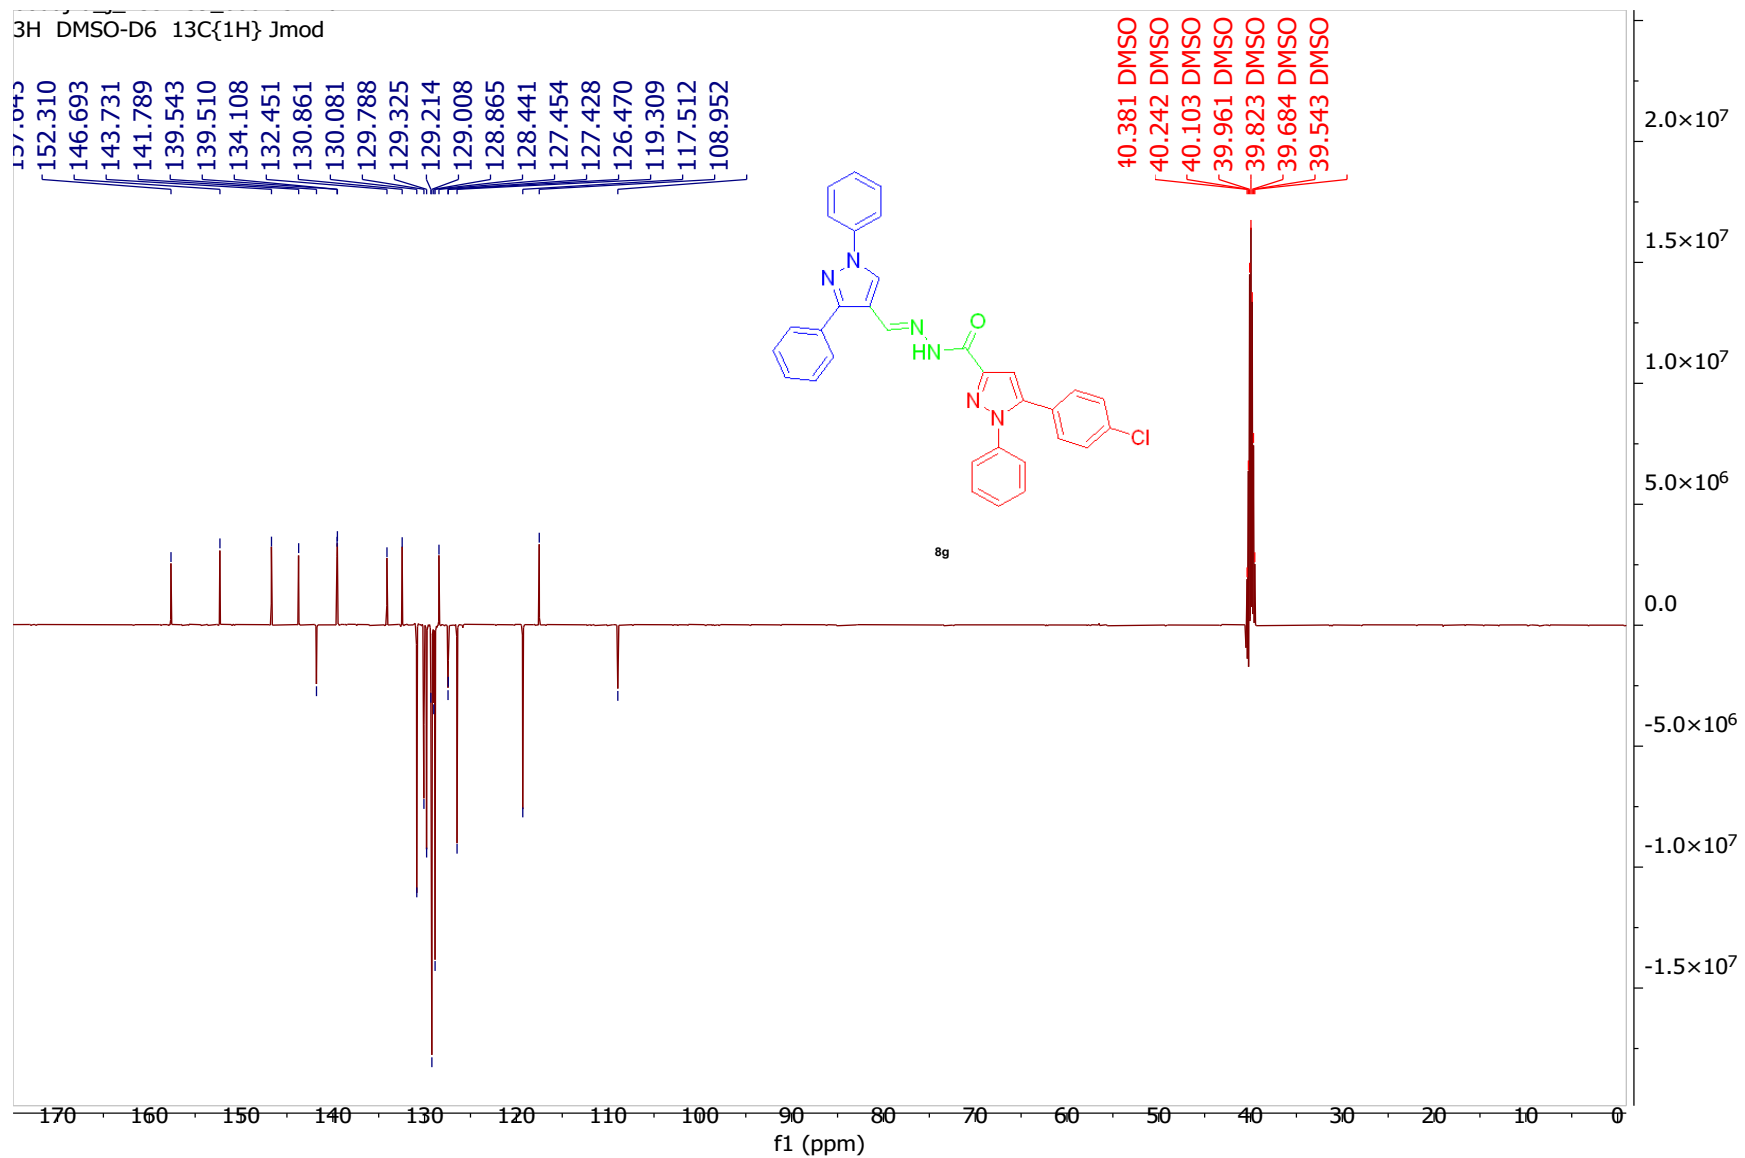

Figure S 21.  $^{13}\text{C}$  NMR of compound **8g**

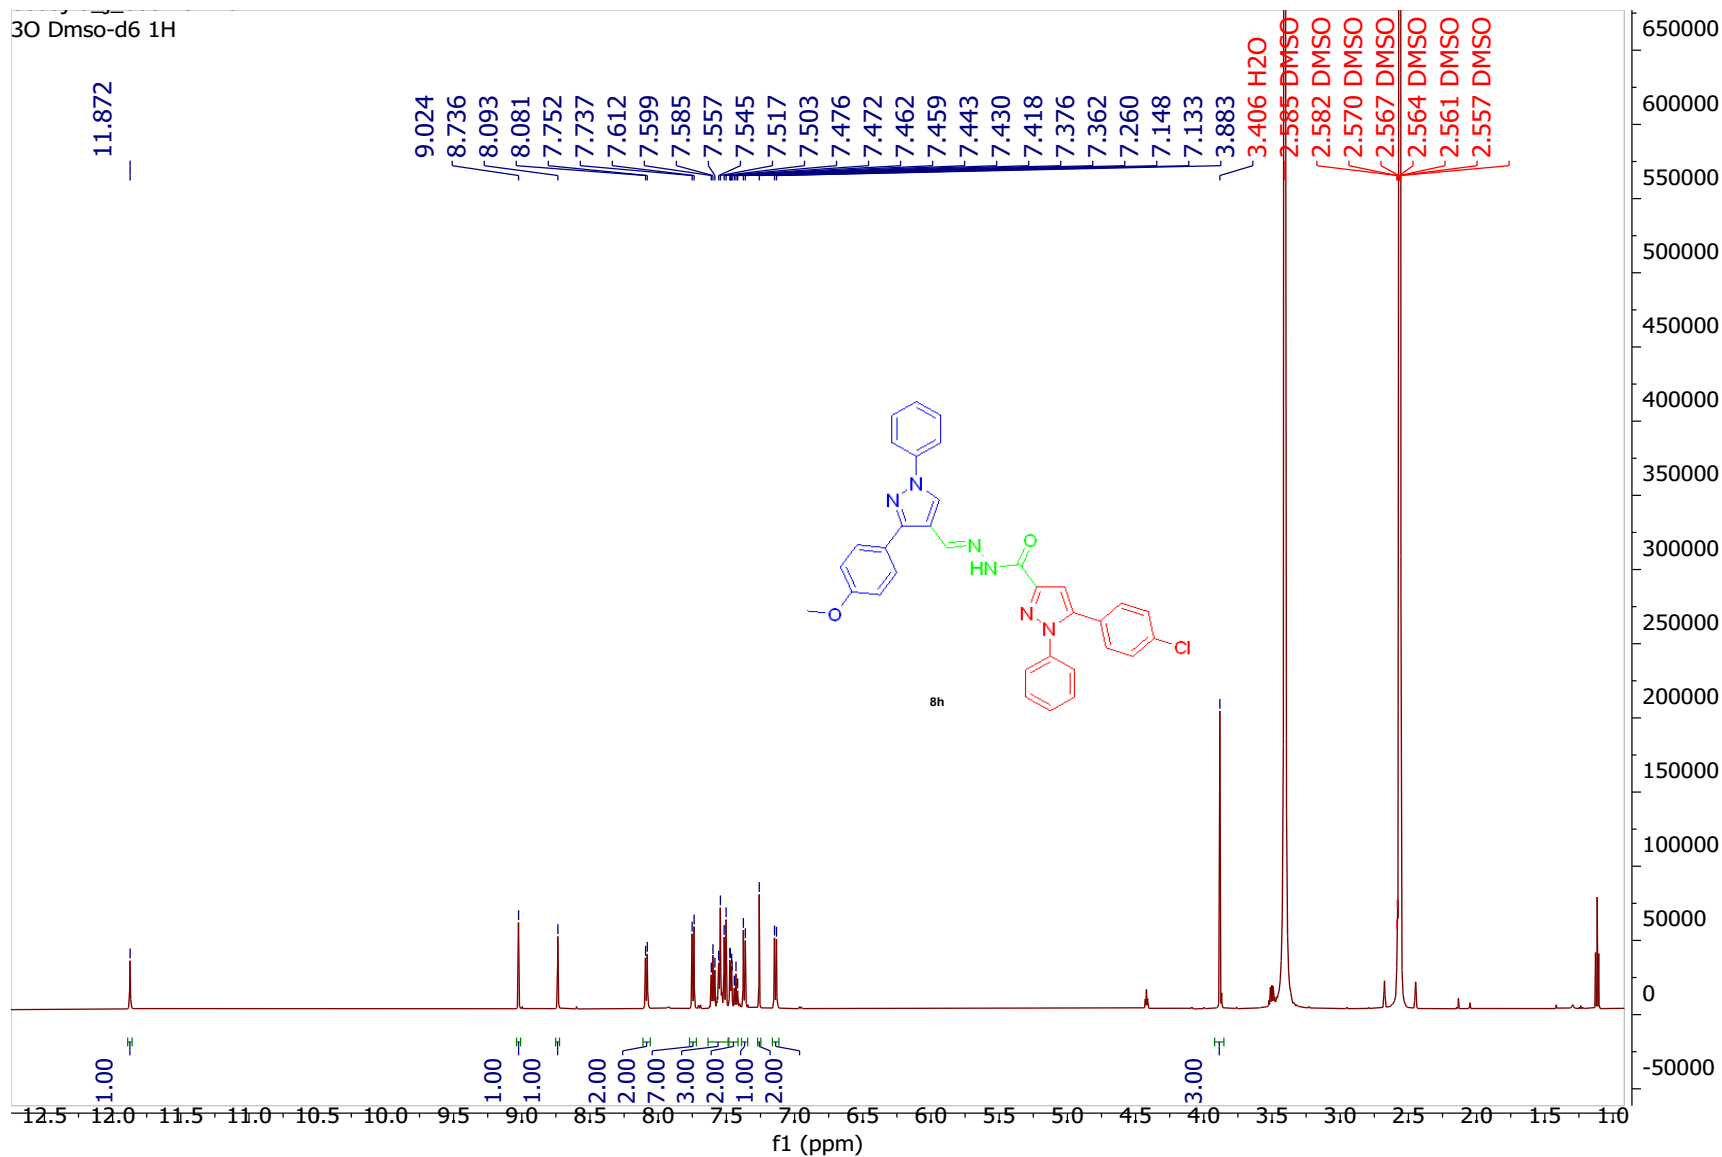

Figure S 22.  $^1\text{H}$  NMR of compound **8h**

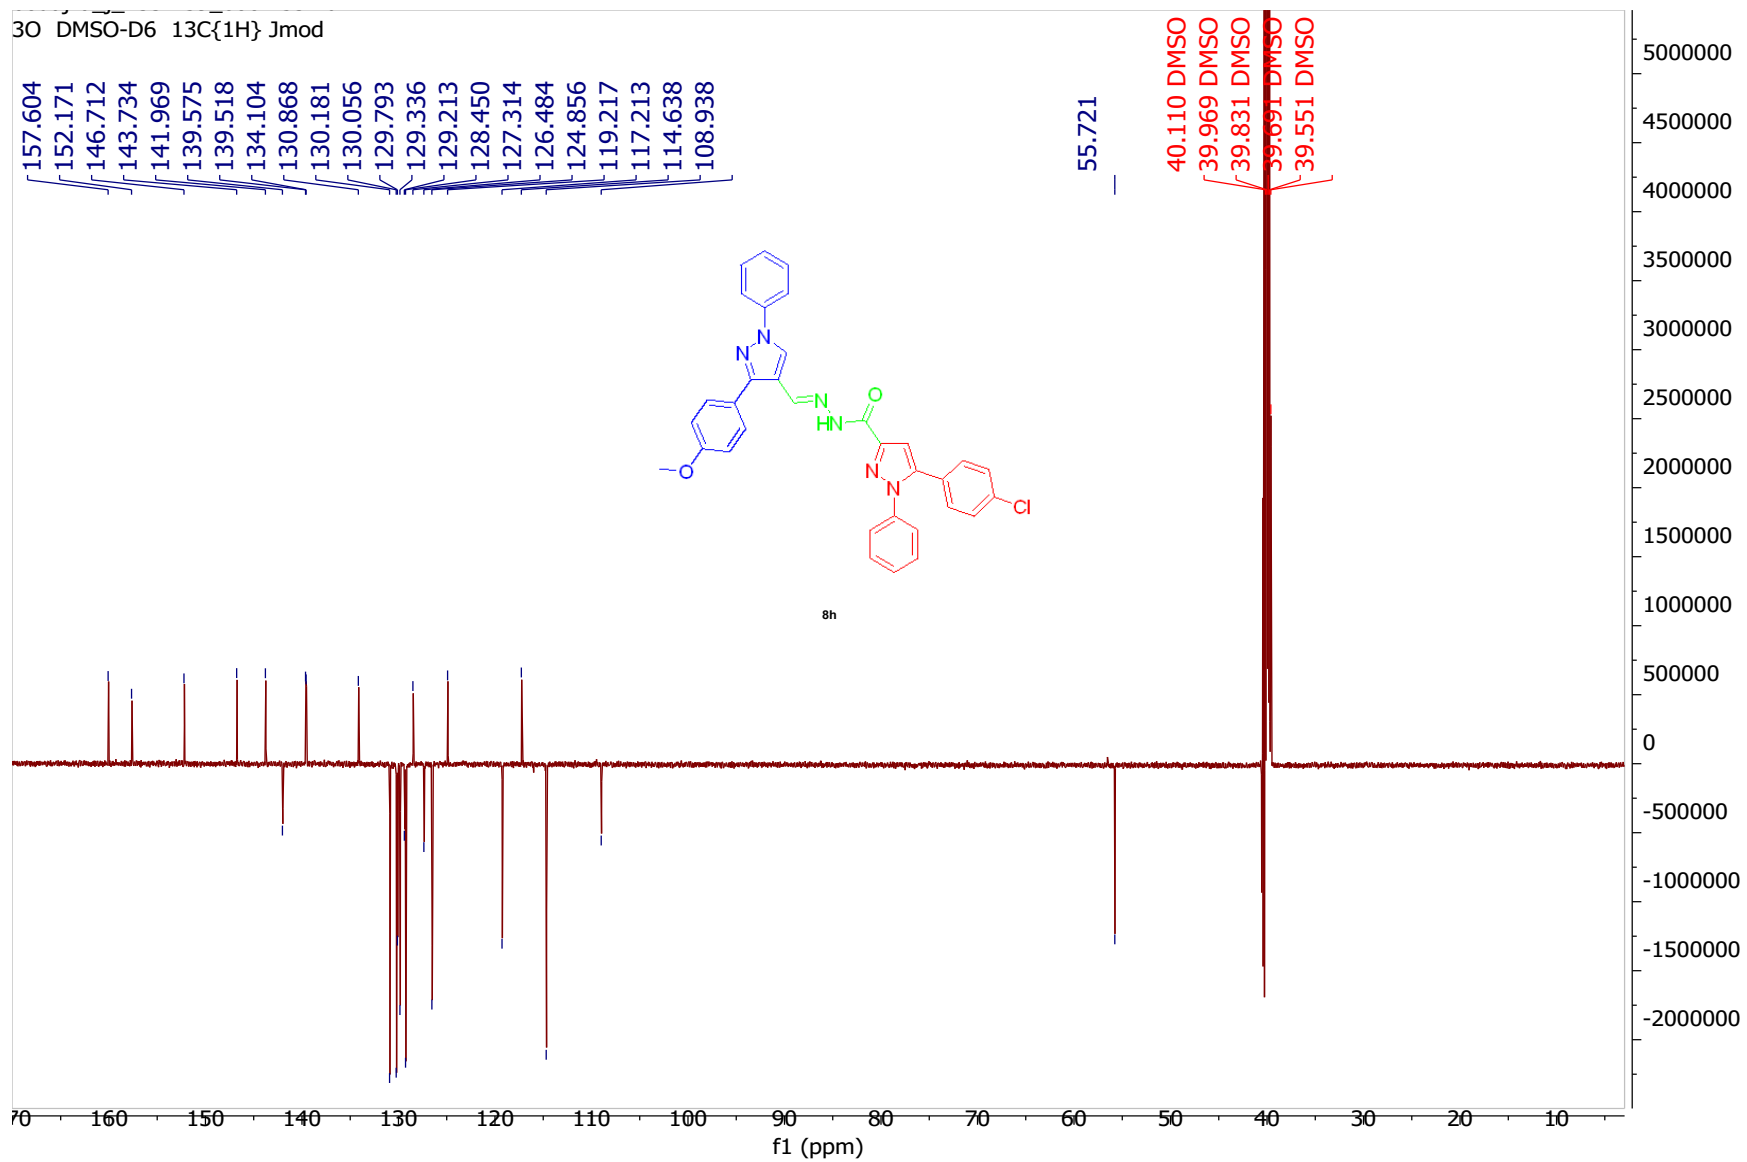

Figure S 23.  $^{13}\text{C}$  NMR of compound 8h

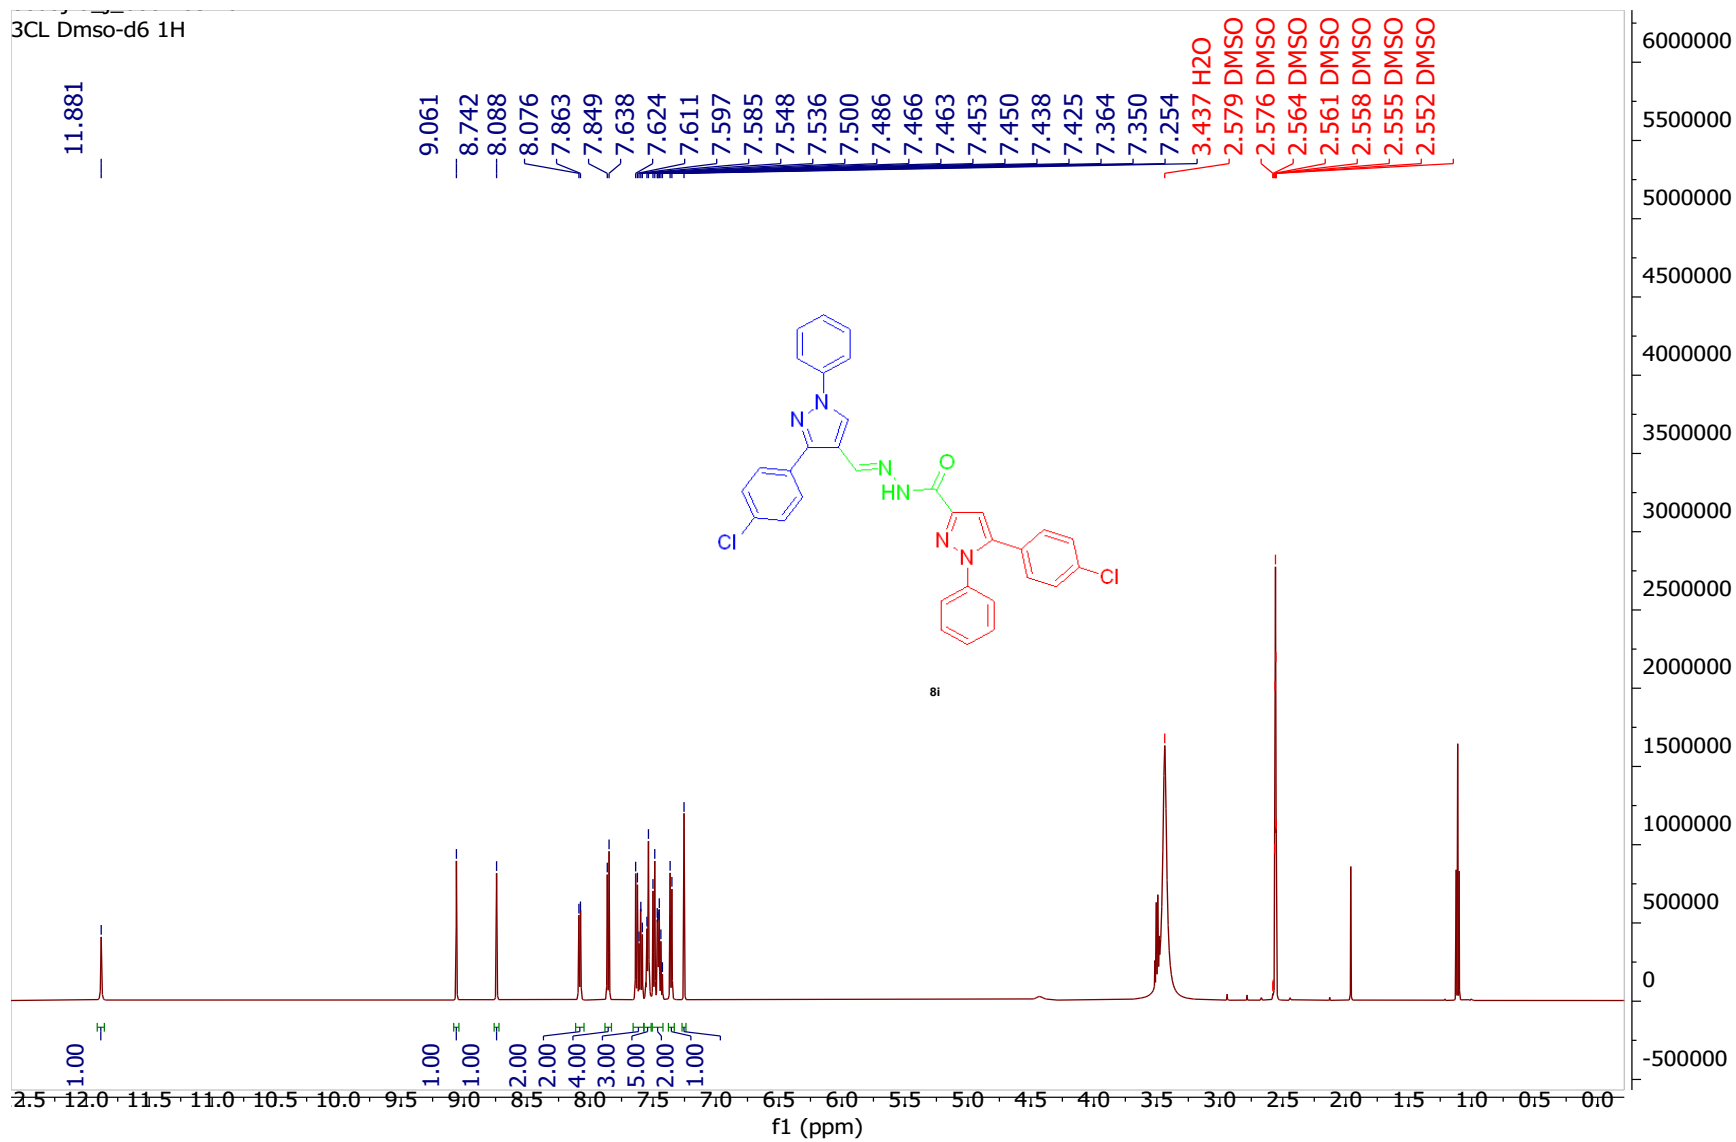

Figure S 24.  $^1\text{H}$  NMR of compound **8i**

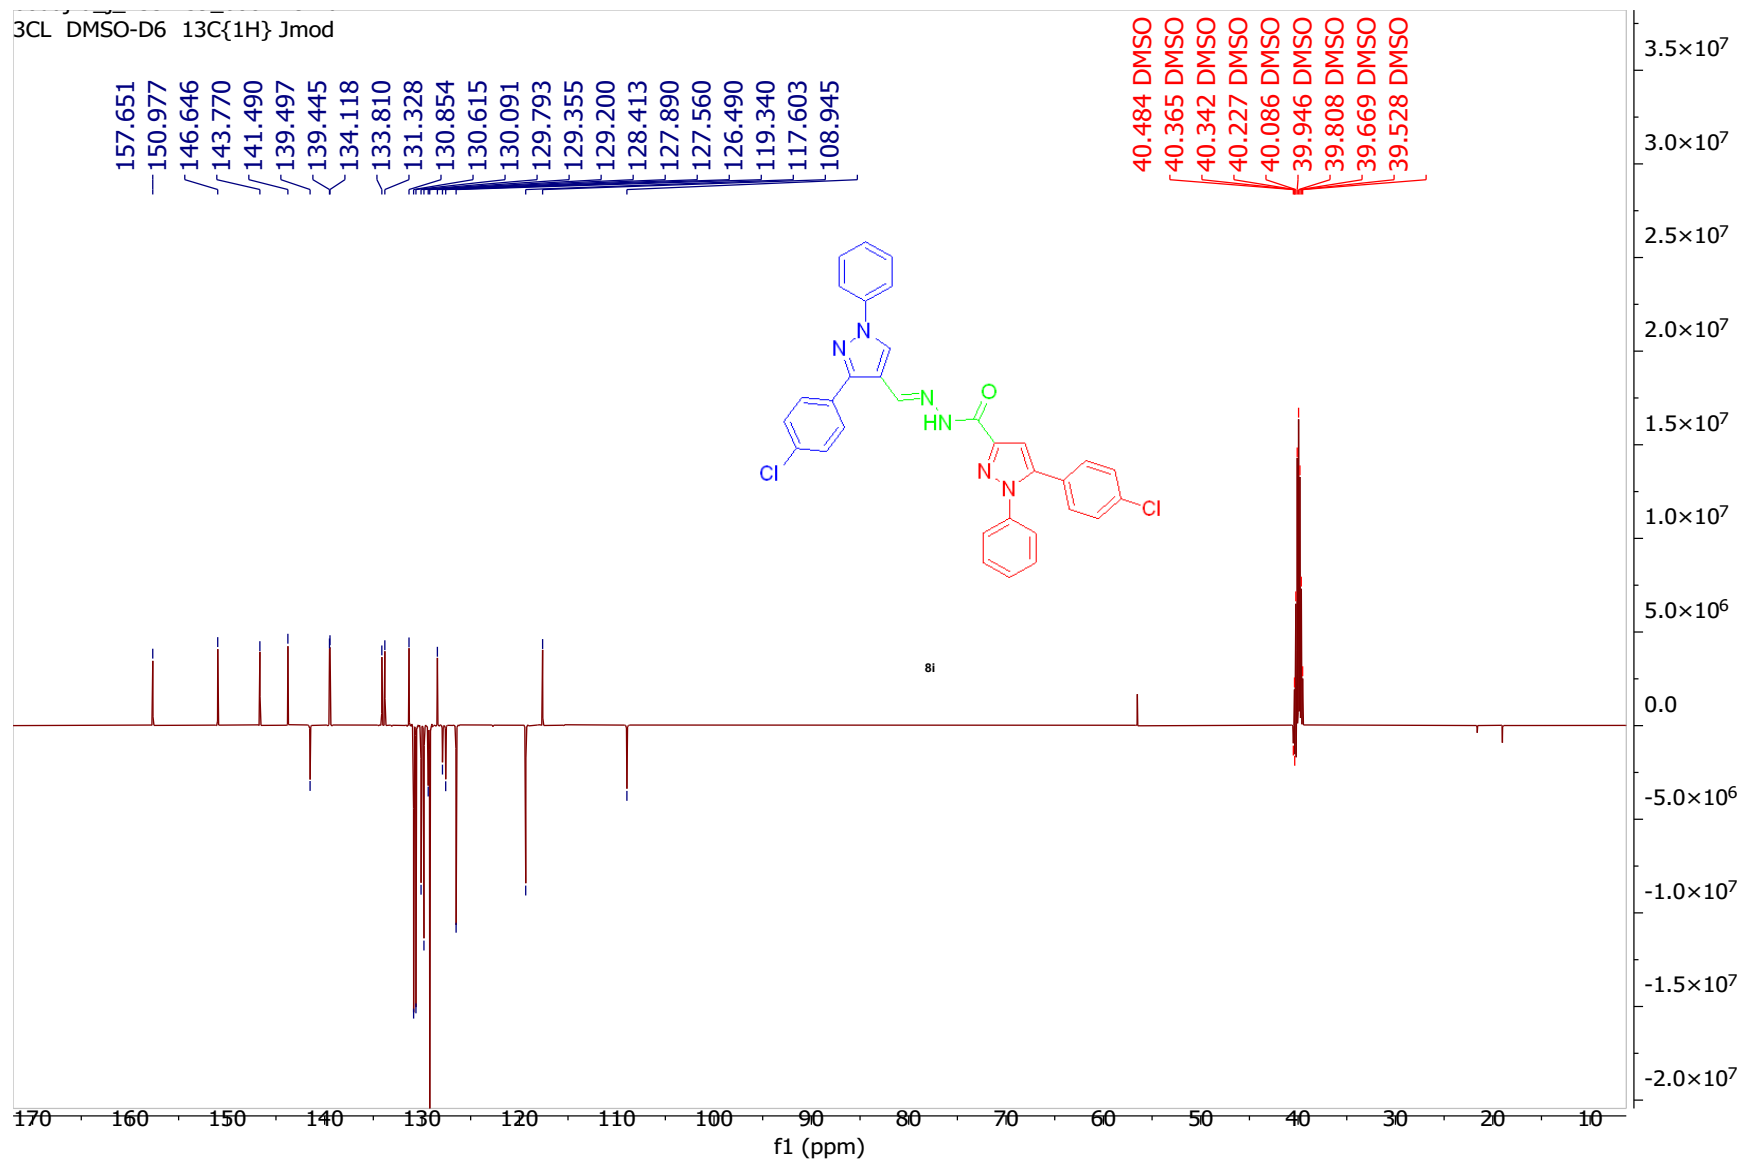

Figure S 25.  $^{13}\text{C}$  NMR of compound **8i**

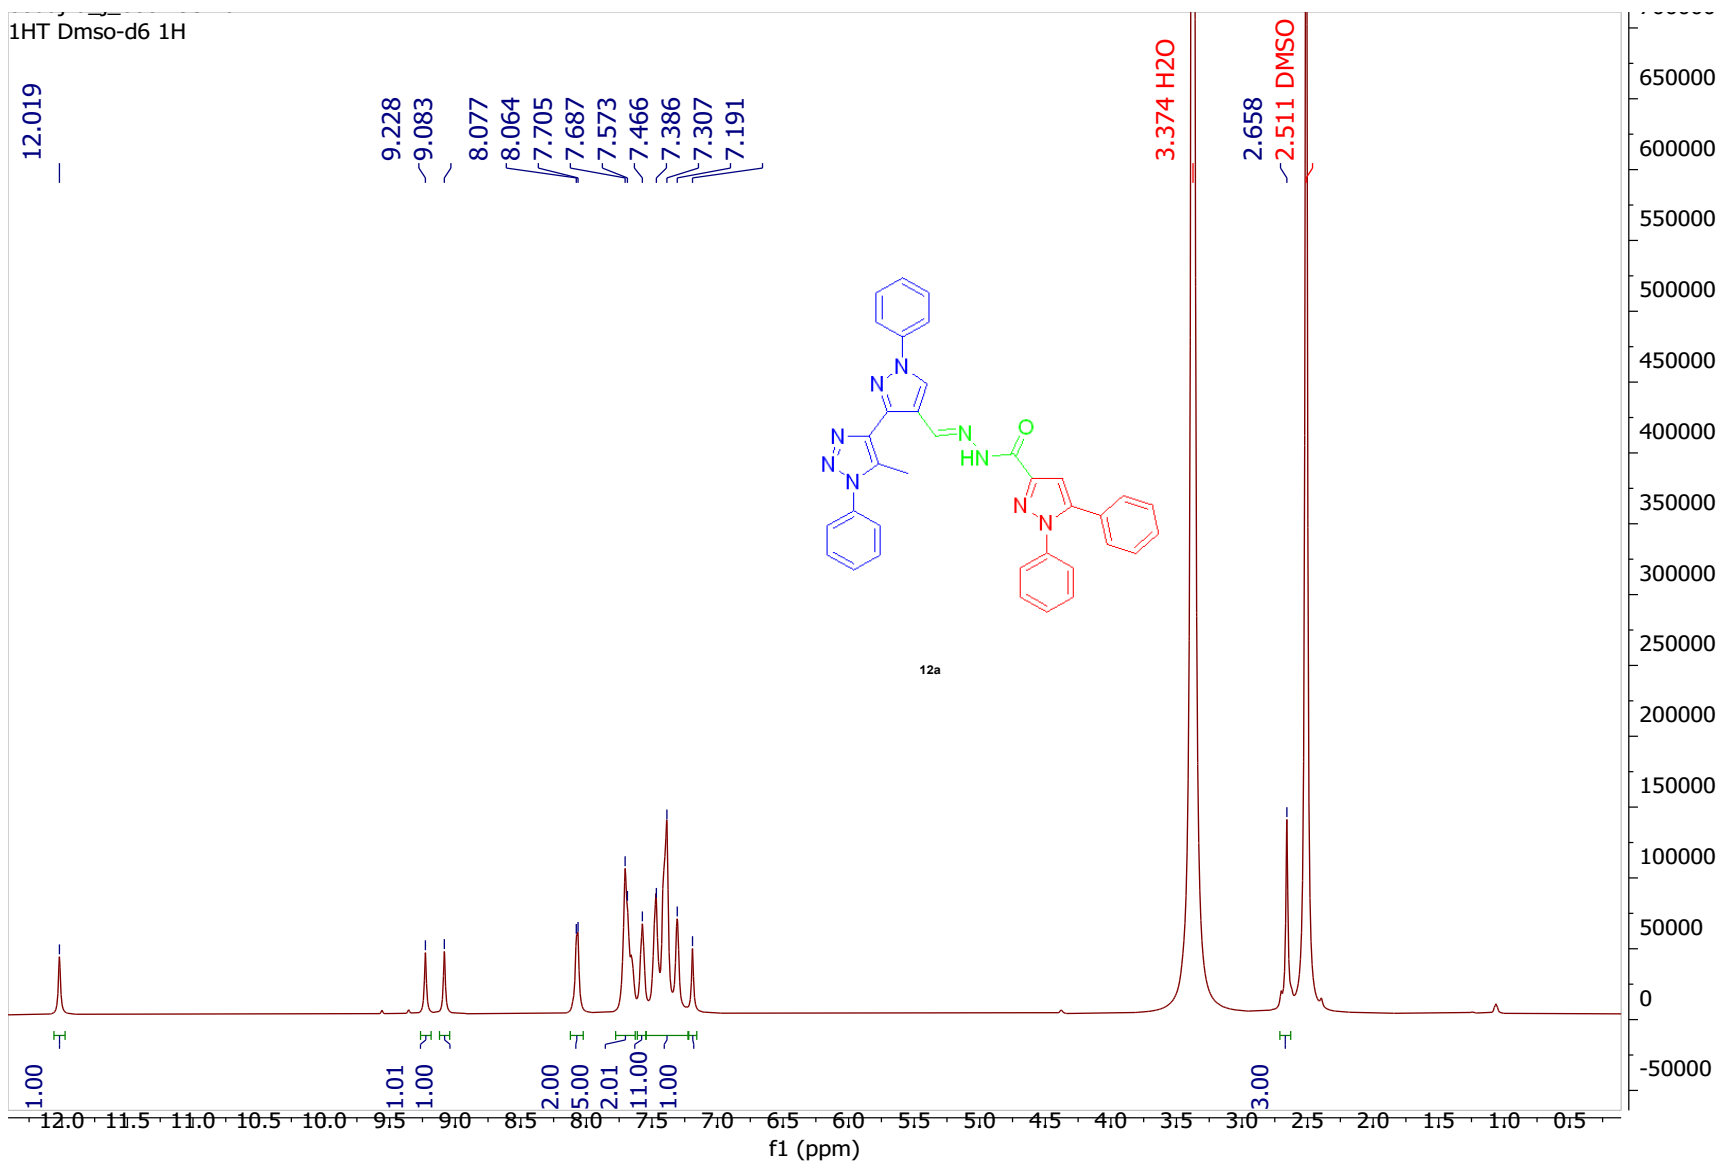

Figure S 26. <sup>1</sup>H NMR of compound 12a

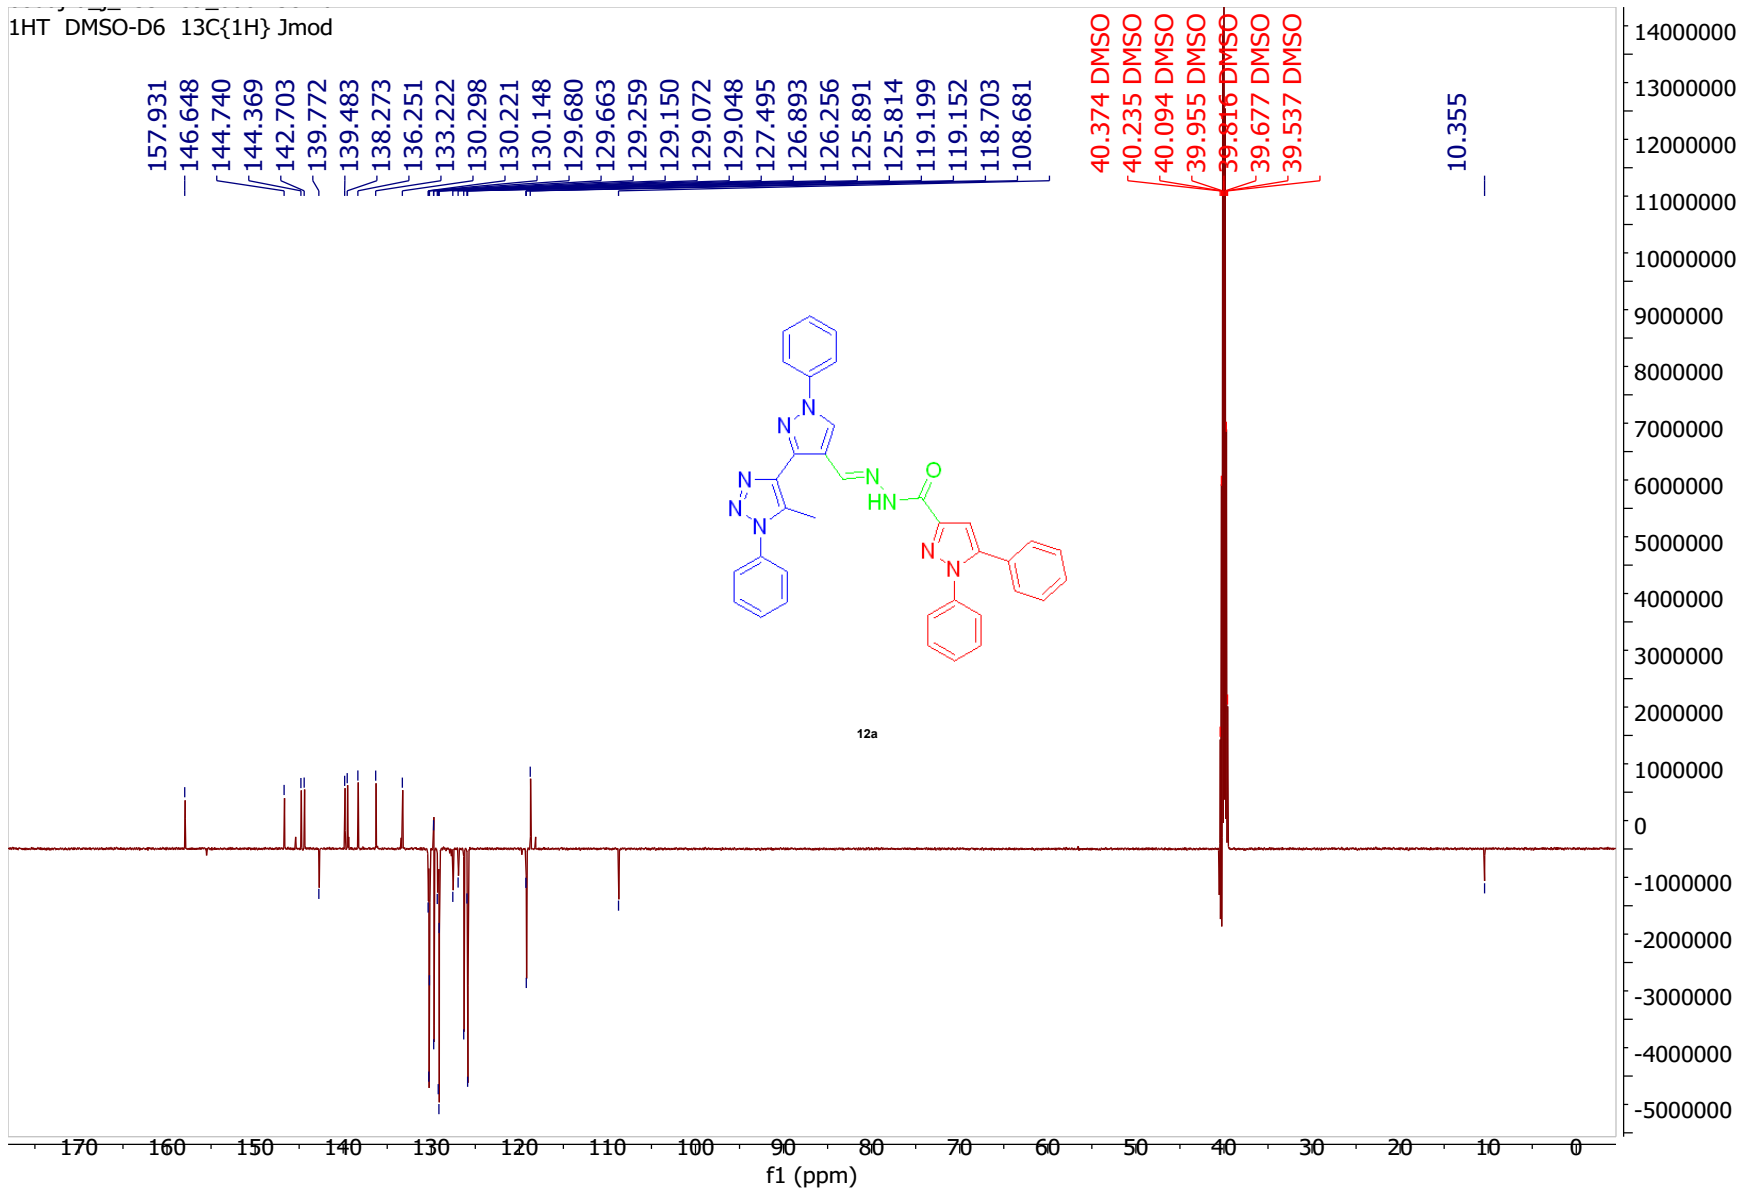

**Figure S 27.**  $^{13}\text{C}$  NMR of compound **12a**

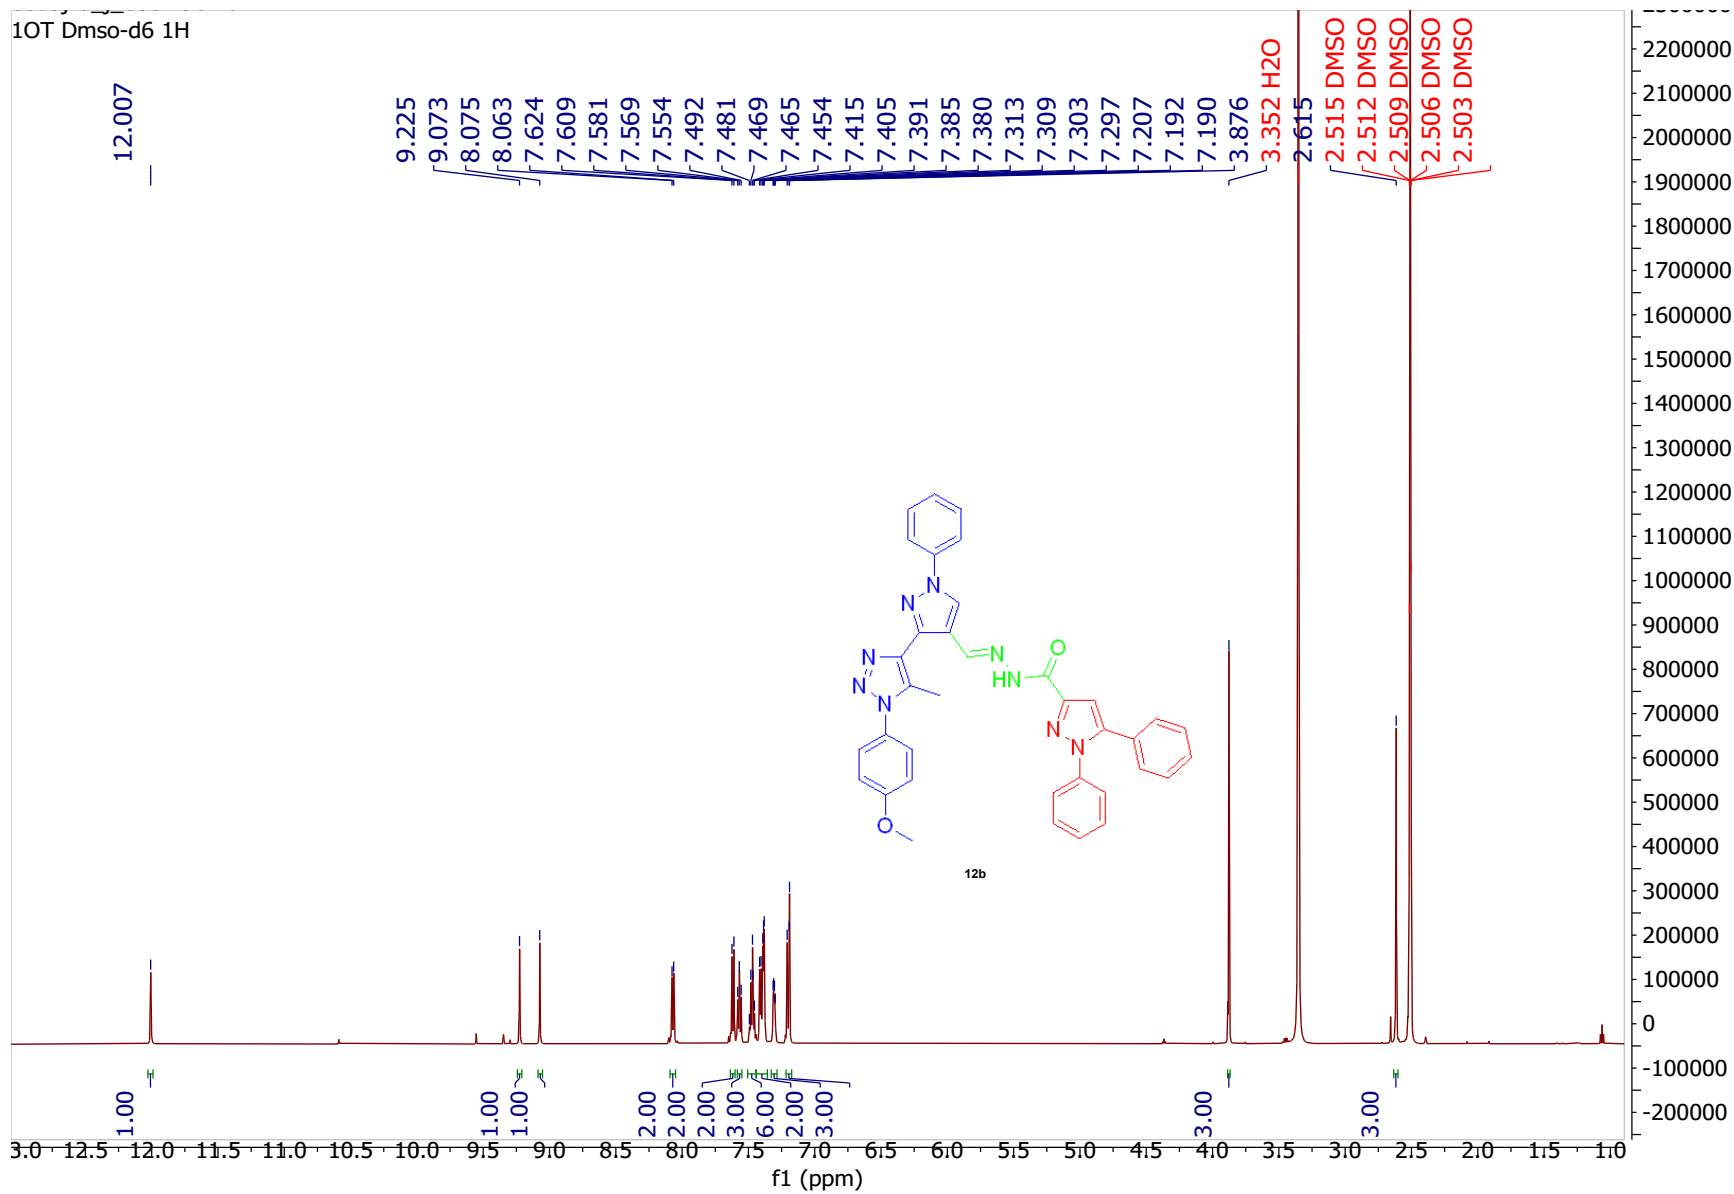

**Figure S 28.**  $^1\text{H}$  NMR of compound **12b**

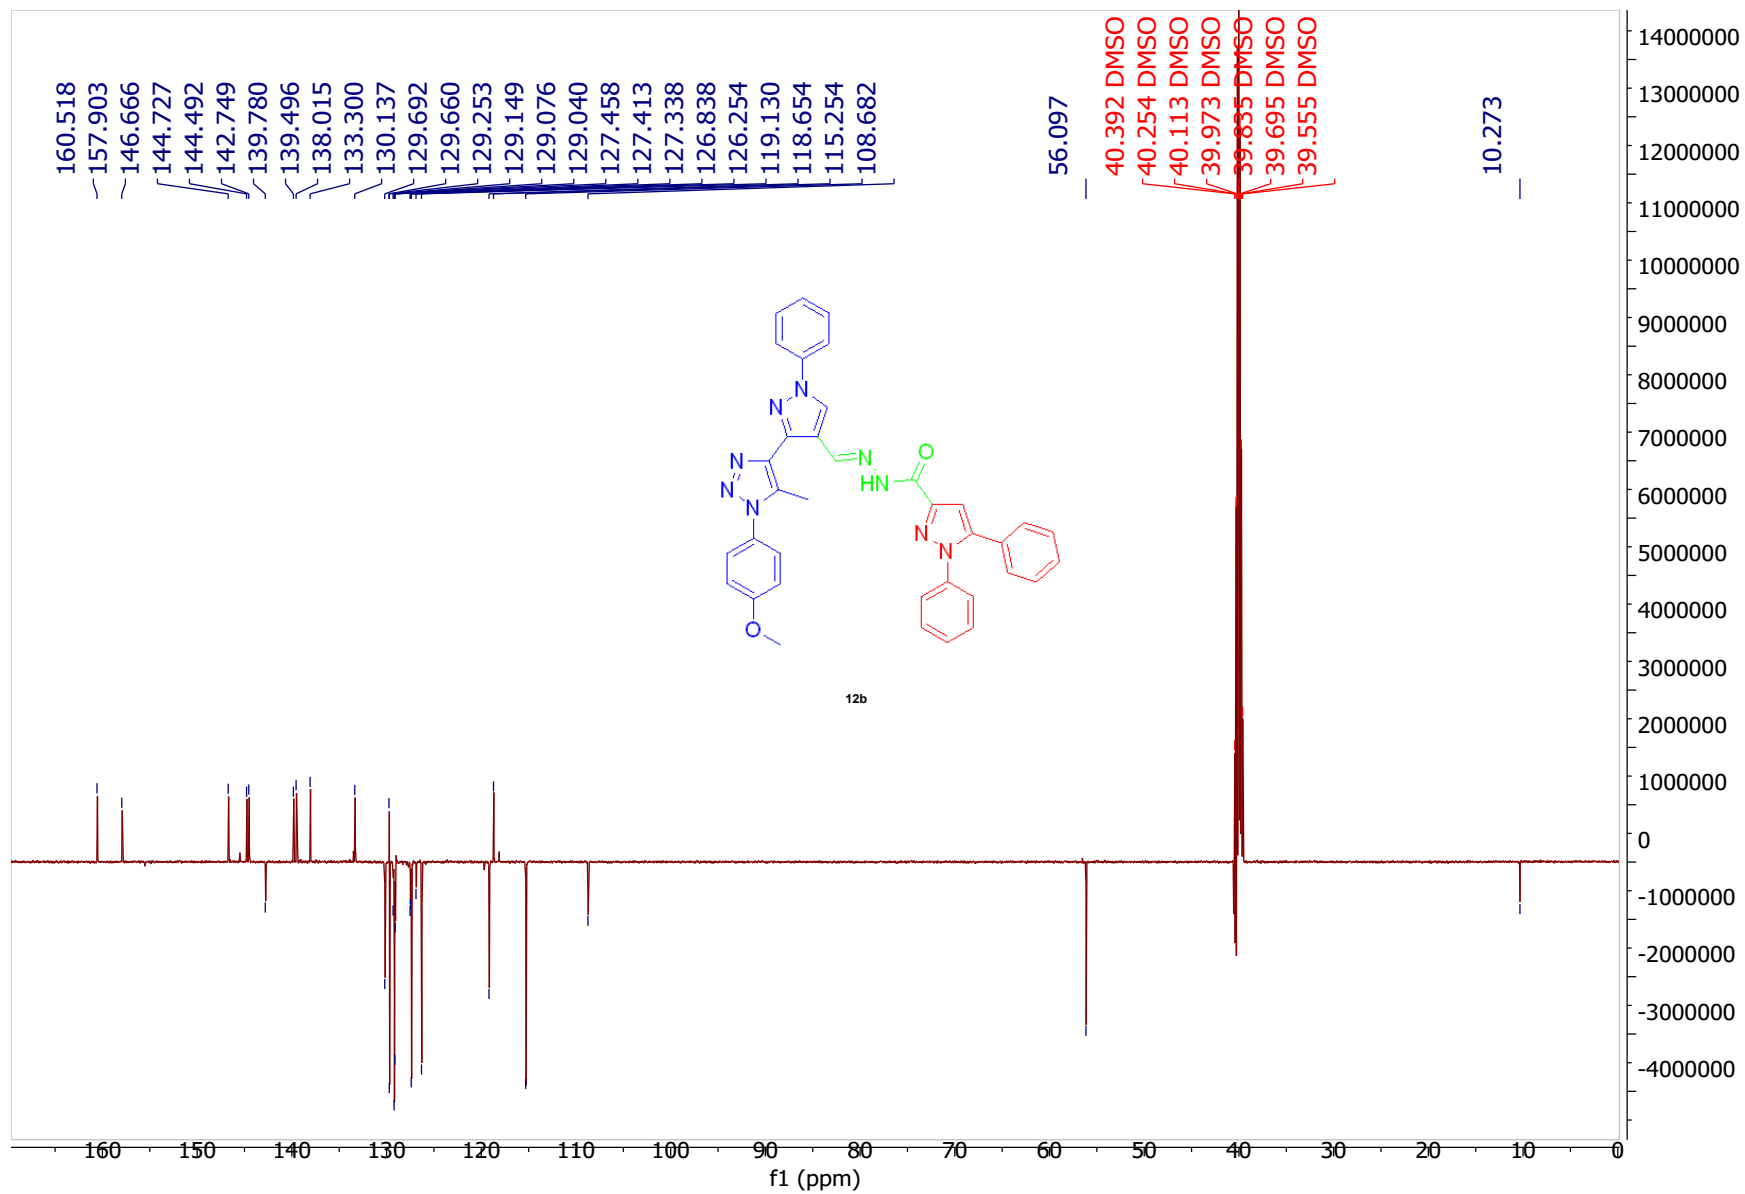

**Figure S 29.**  $^{13}\text{C}$  NMR of compound **12b**

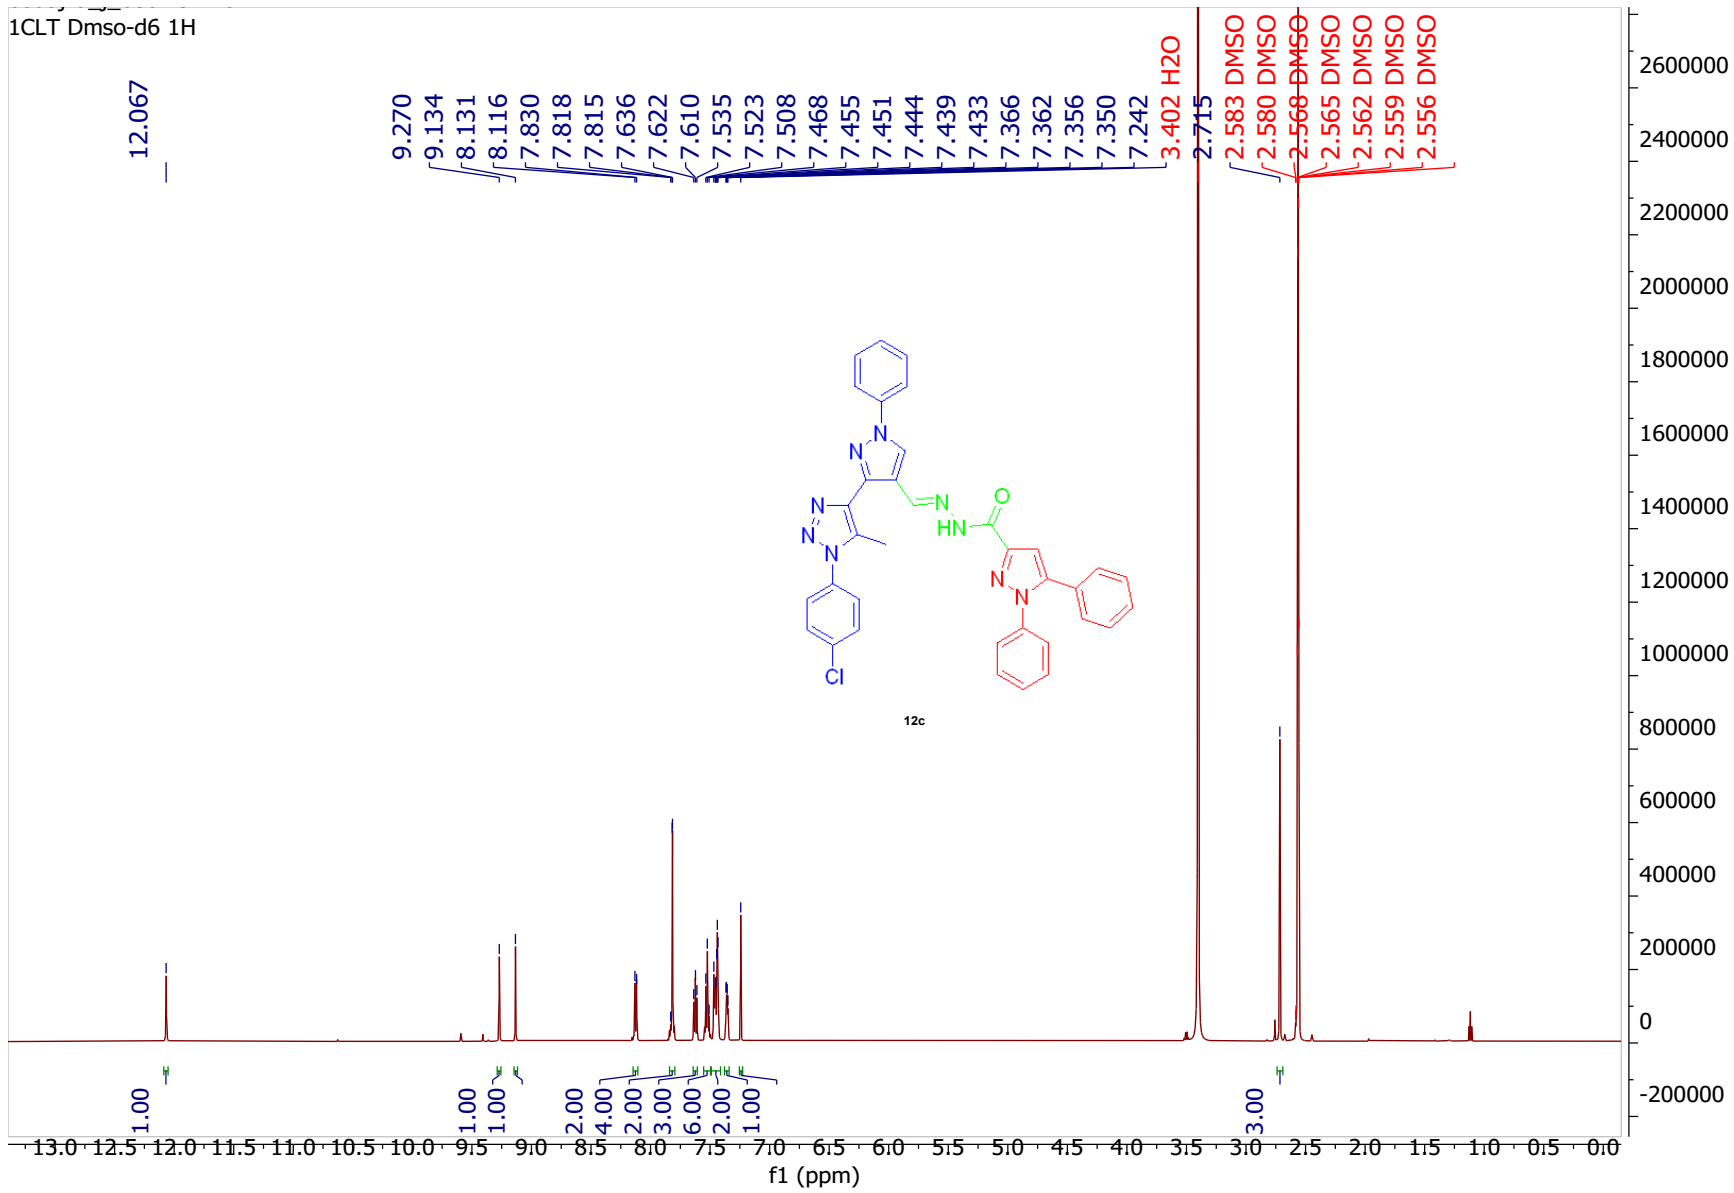

**Figure S 30.**  $^1\text{H}$  NMR of compound **12c**

1CLT DMSO-D6 13C{1H} Jmod

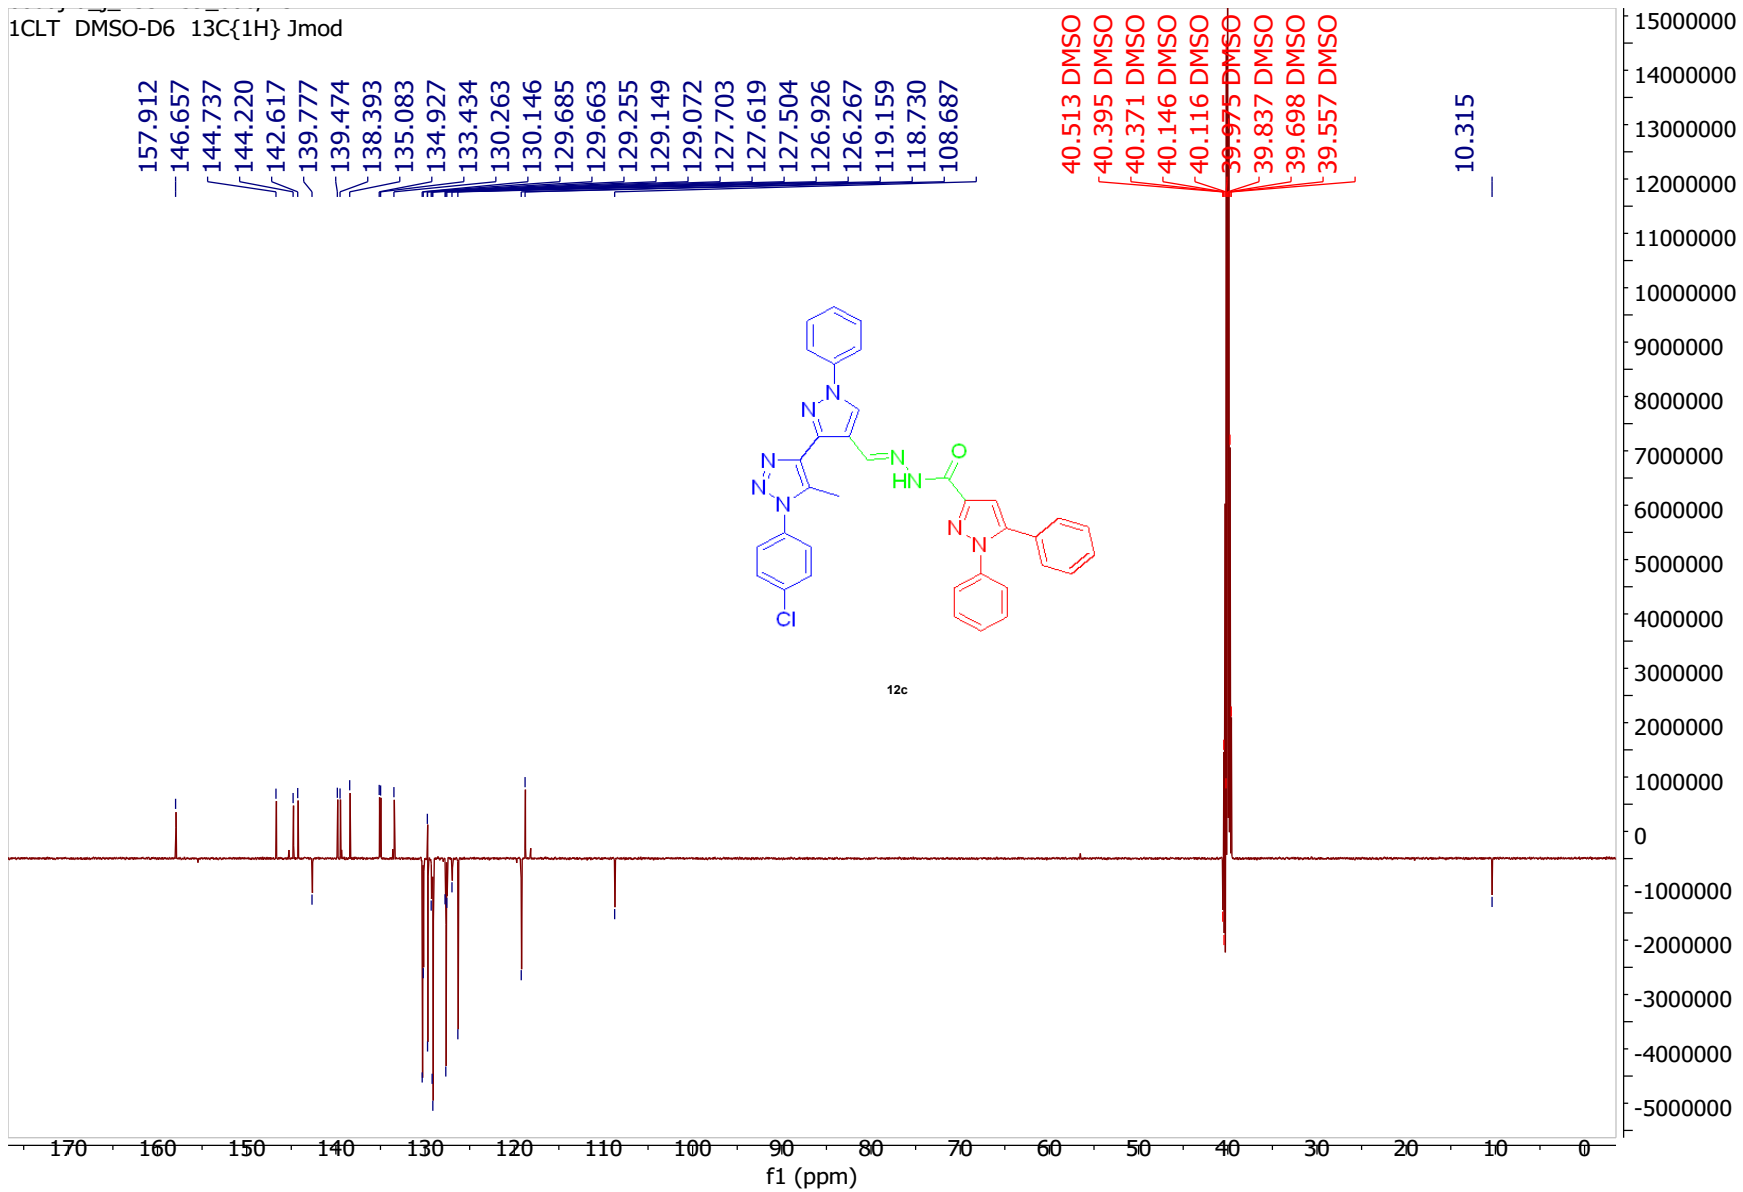

**Figure S 31.**  $^{13}\text{C}$  NMR of compound **12c**

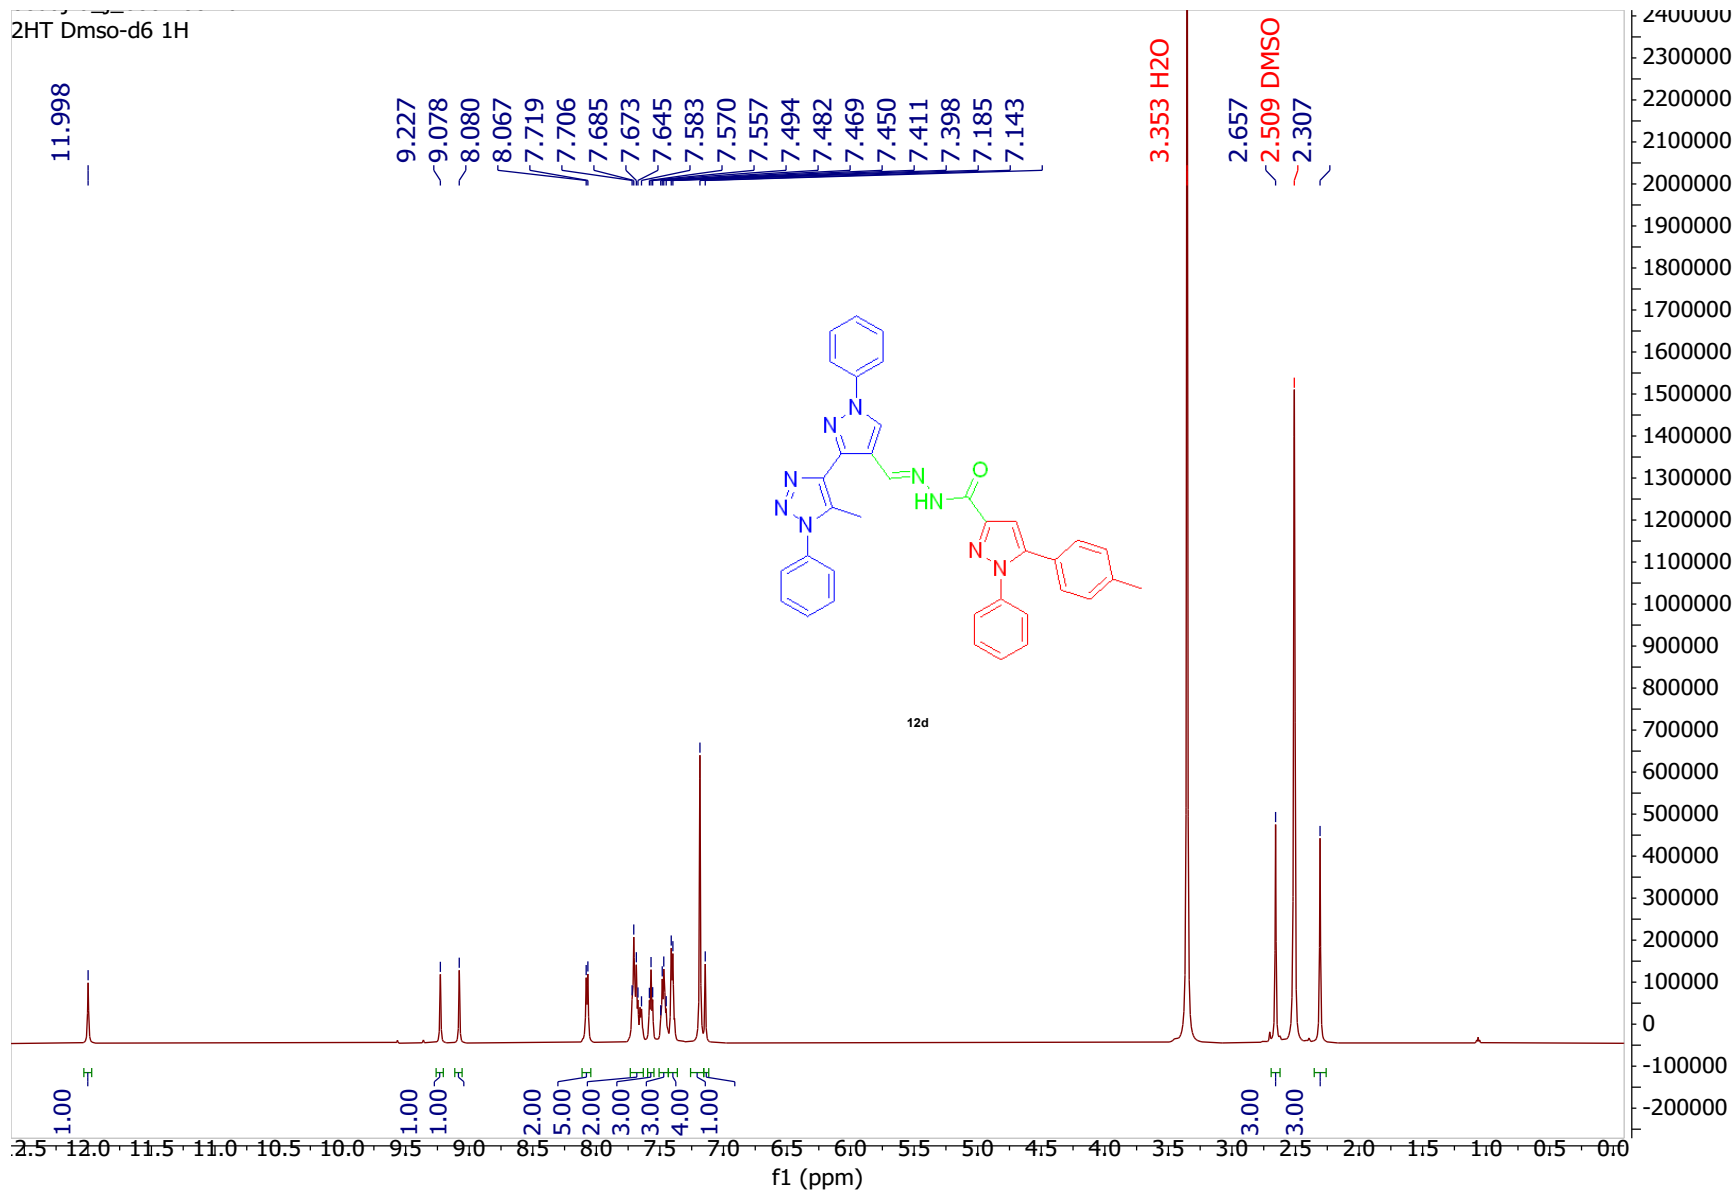

**Figure S 32.**  $^1\text{H}$  NMR of compound **12d**

bouajila\_j\_233-259\_600.246.fid  
2HT DMSO-D6 13C{1H} Jmod

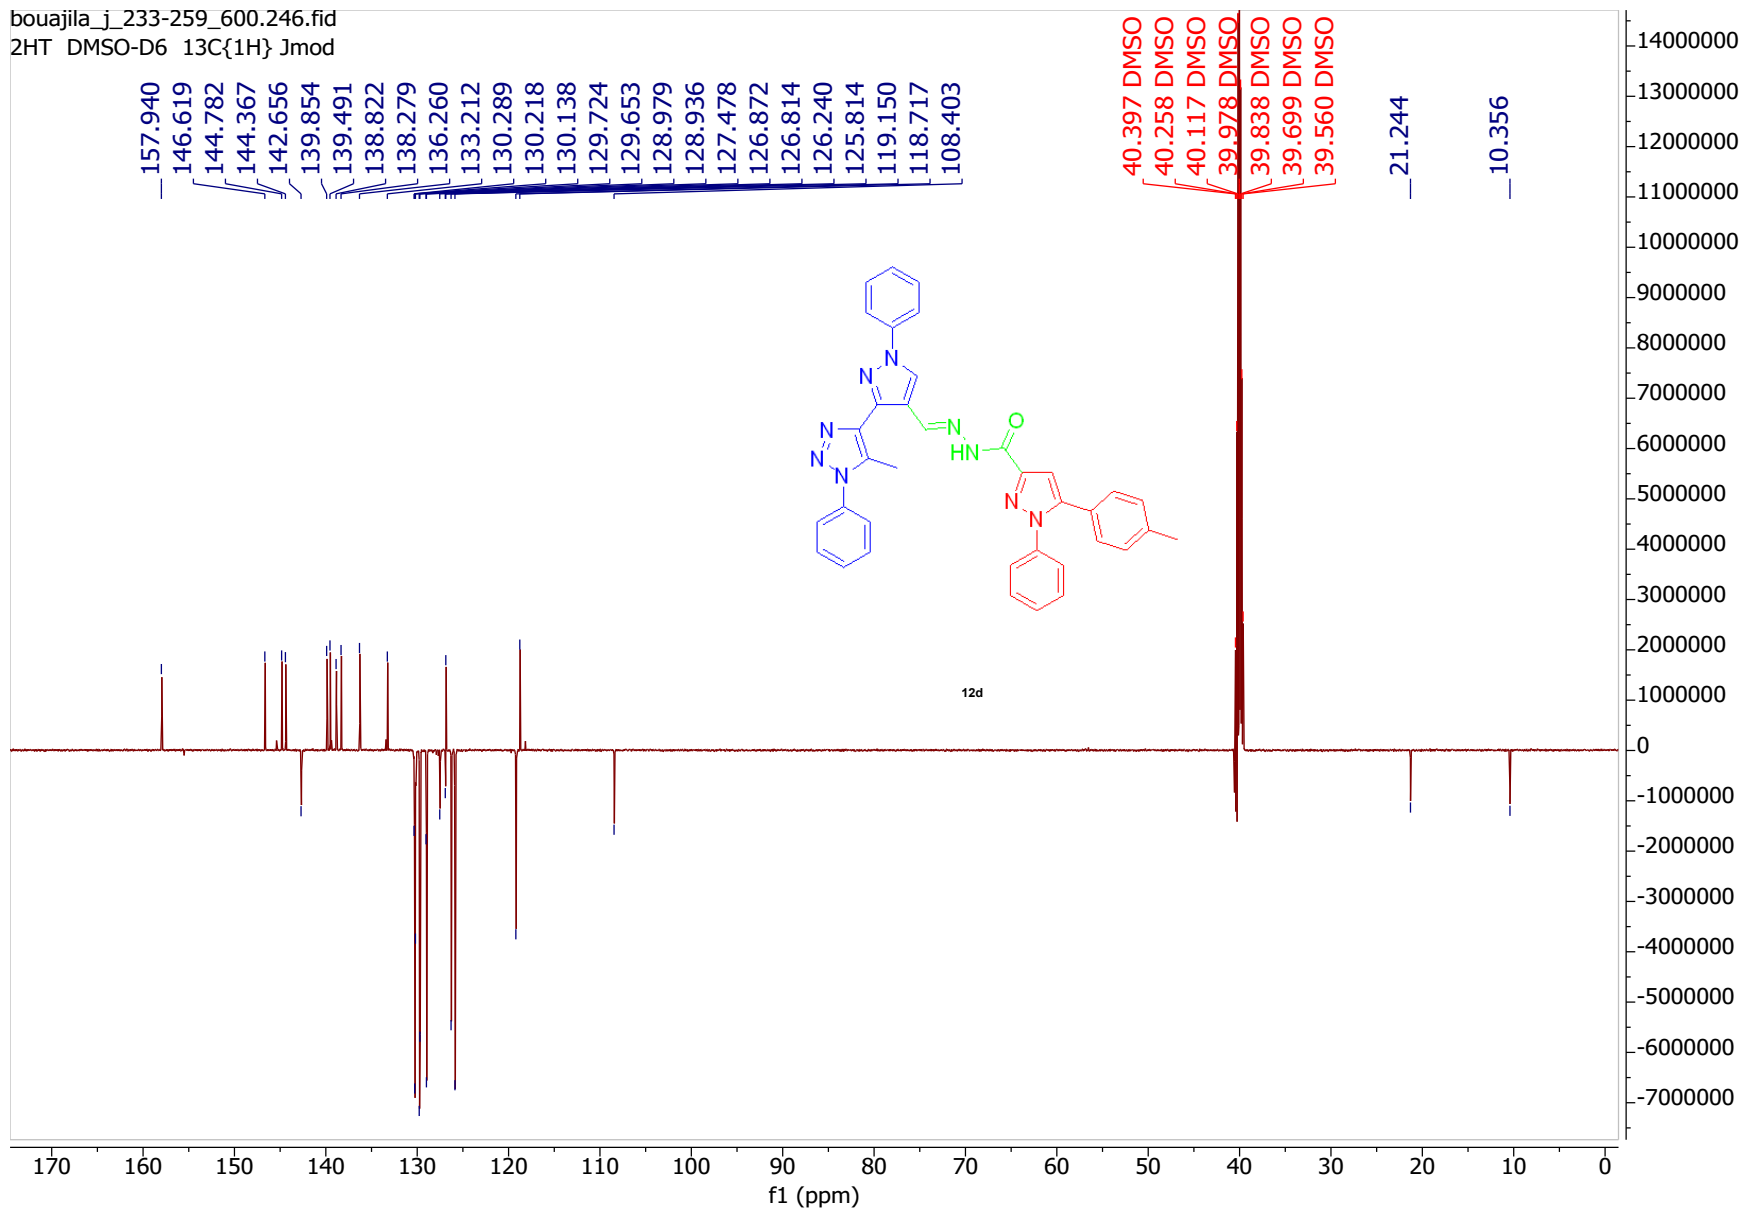

**Figure S 33**  $^{13}\text{C}$  NMR of compound **12d**

bouajila\_j\_600.202.fid  
2OT Dms0-d6 1H

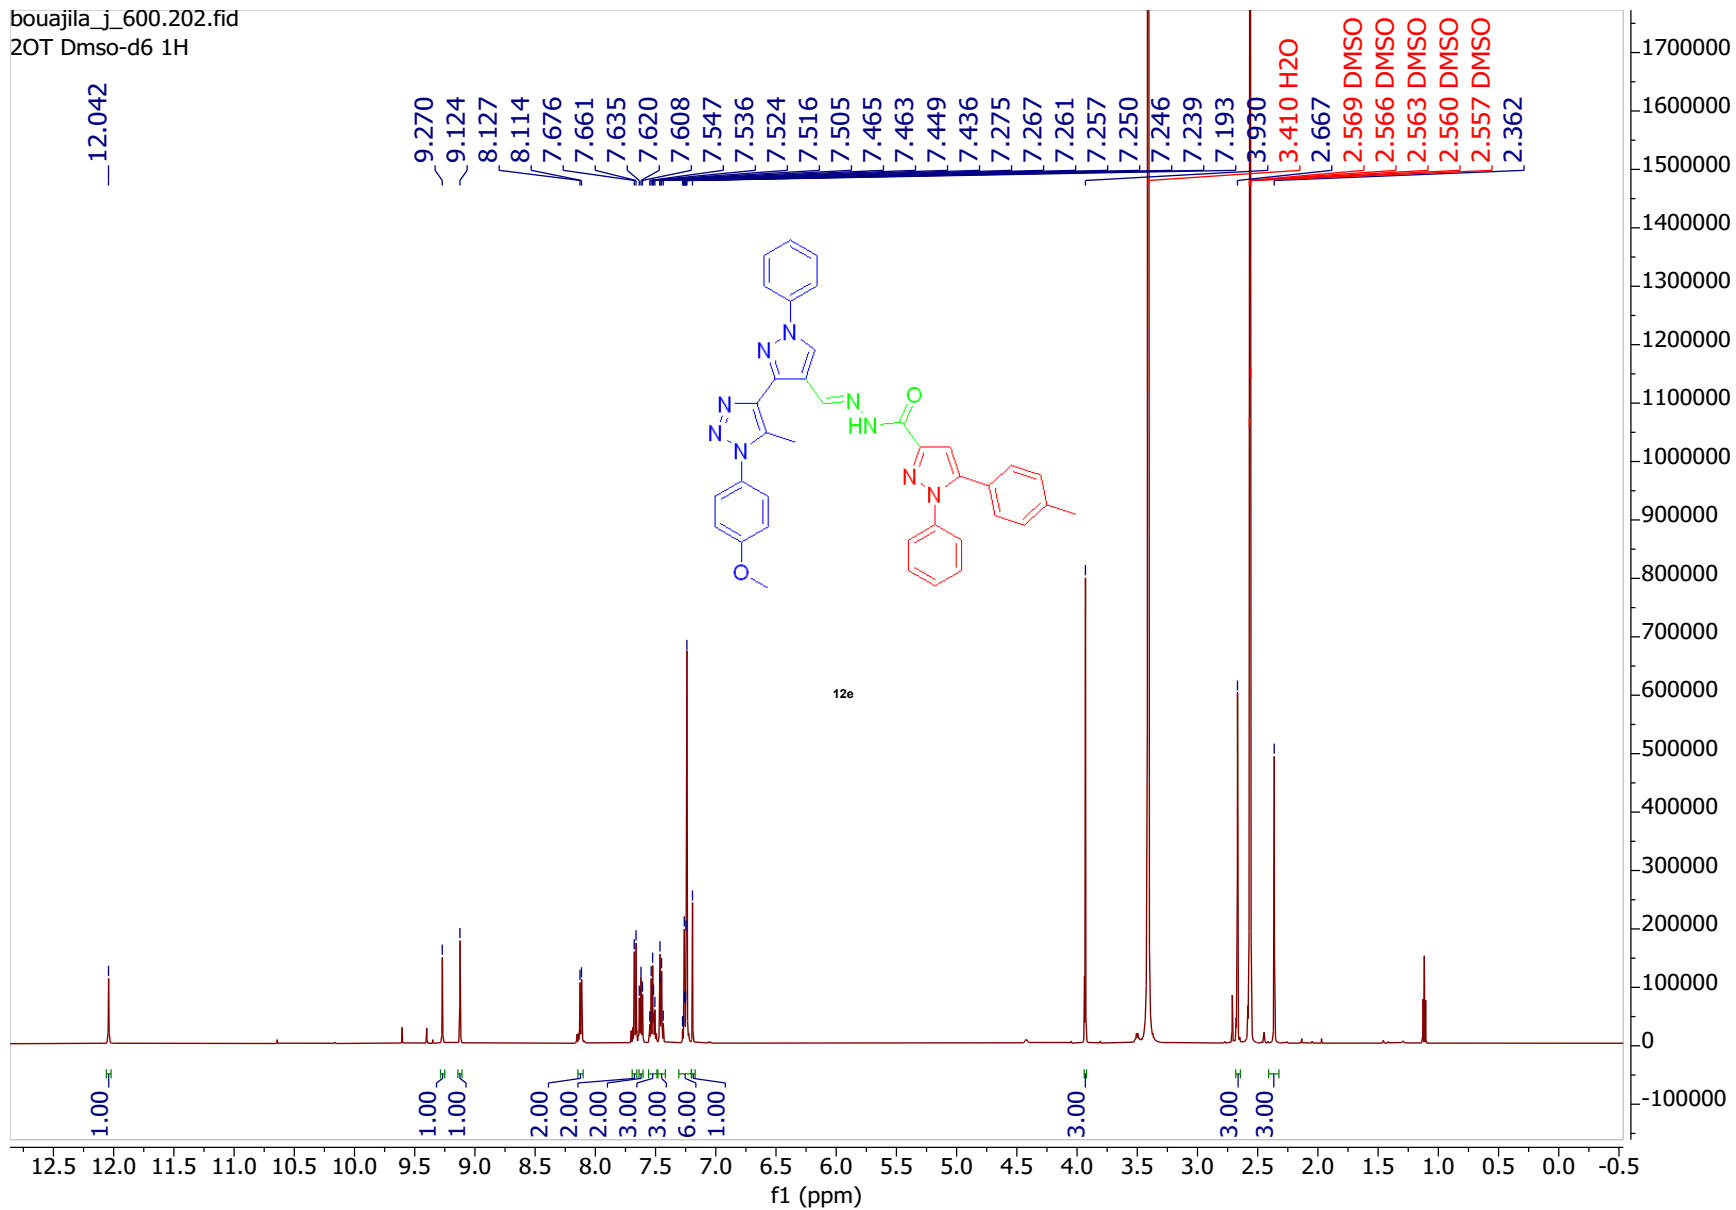

**Figure S 34.**  $^1\text{H}$  NMR of compound **12e**

bouajila\_j\_233-259\_600.248.fid  
2OT DMSO-D6 13C{1H} Jmod

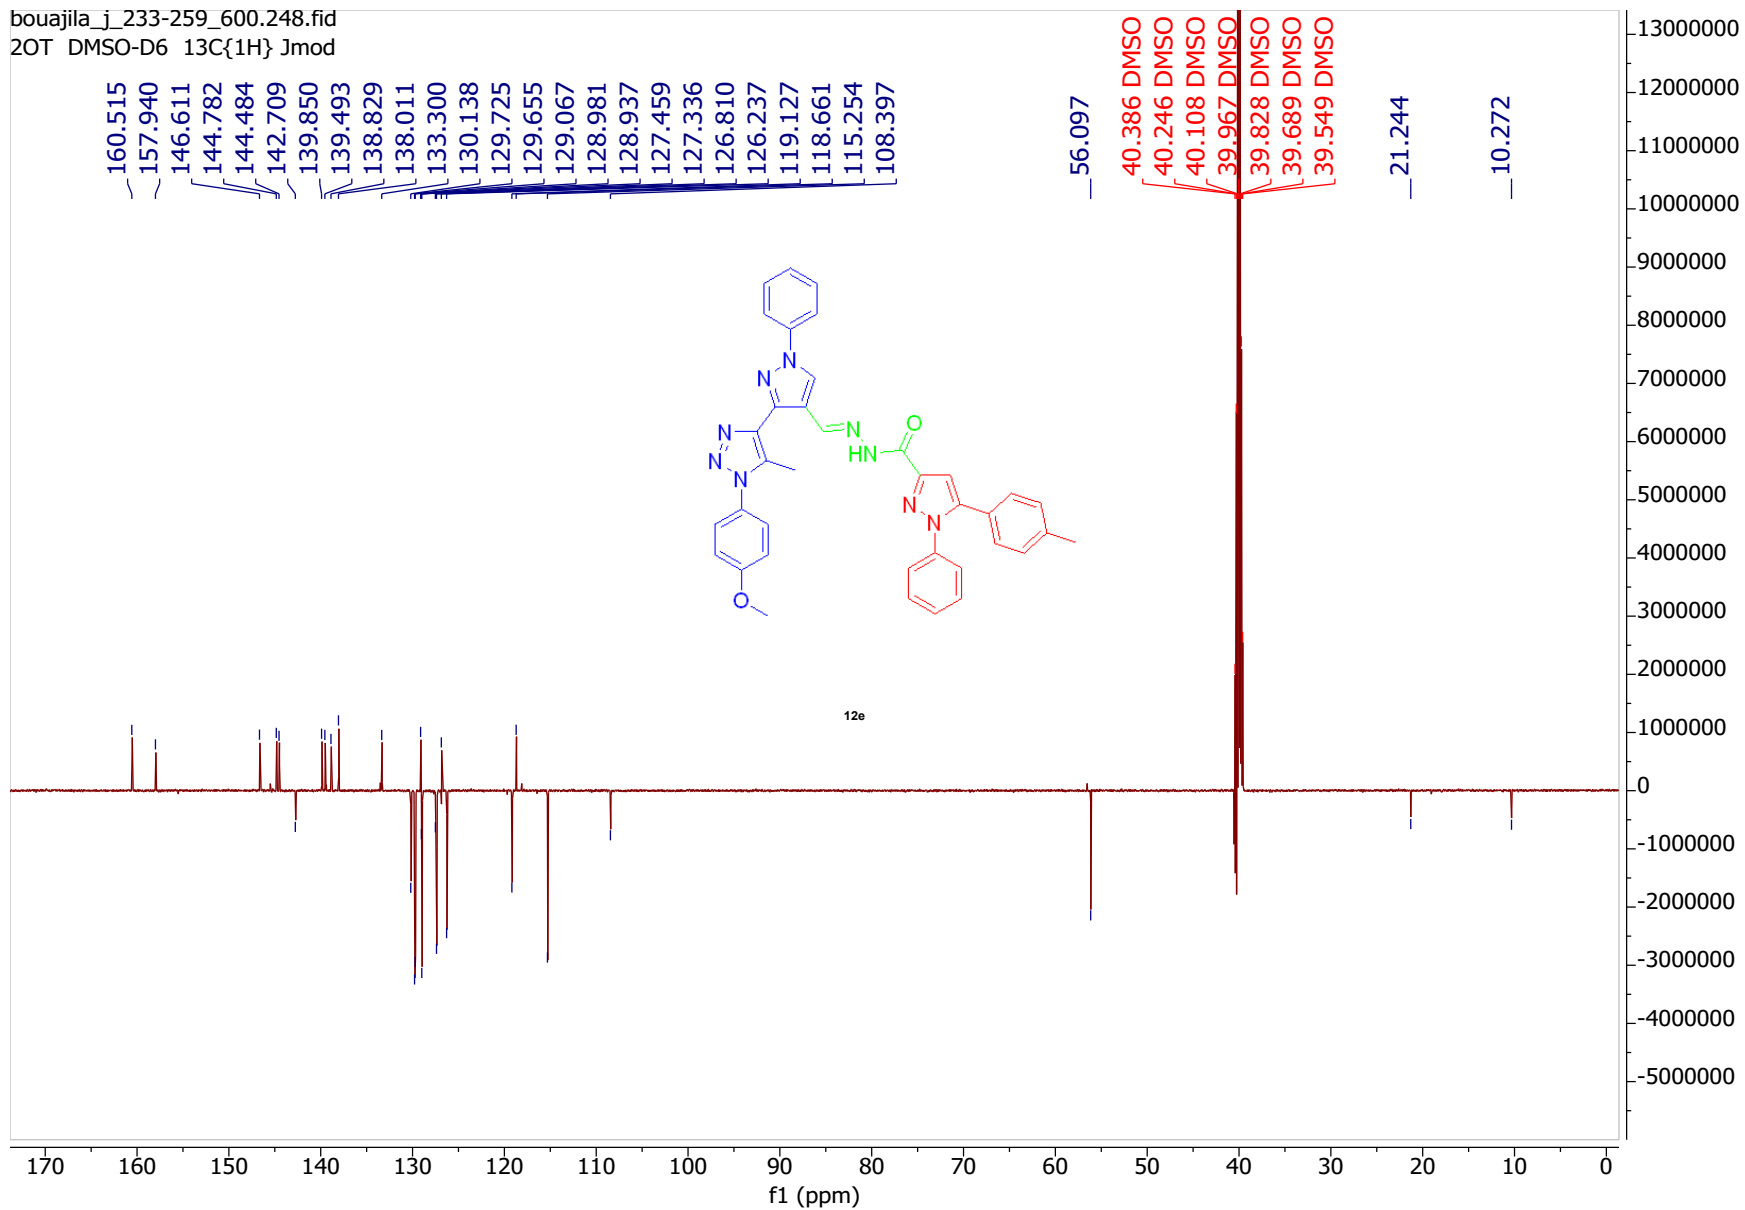

**Figure S 35.**  $^{13}\text{C}$  NMR of compound **12e**

bouajila\_j\_600.198.fid  
2CLT Dms0-d6 1H

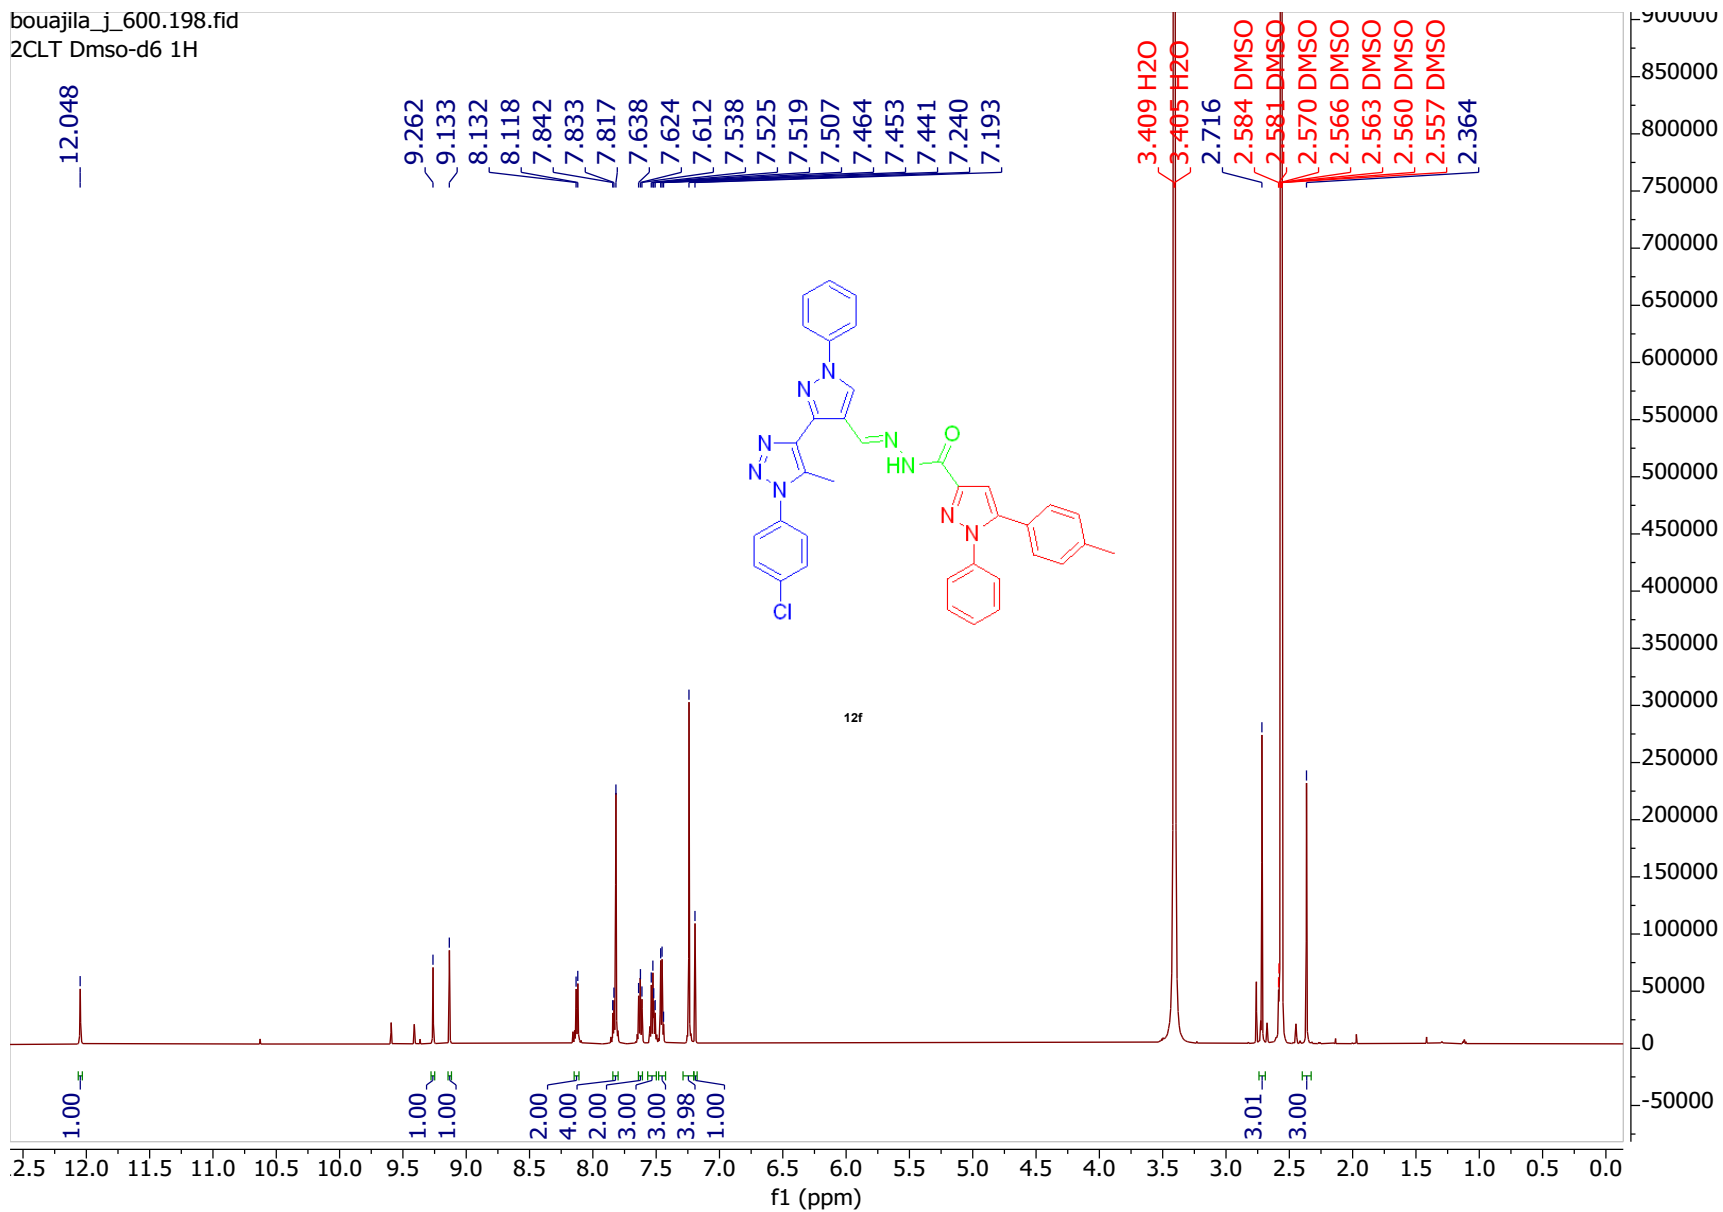

**Figure S 36.**  $^1\text{H}$  NMR of compound **12f**

bouajila\_j\_233-259\_600.244.fid  
2CLT DMSO-D6 13C{1H} Jmod

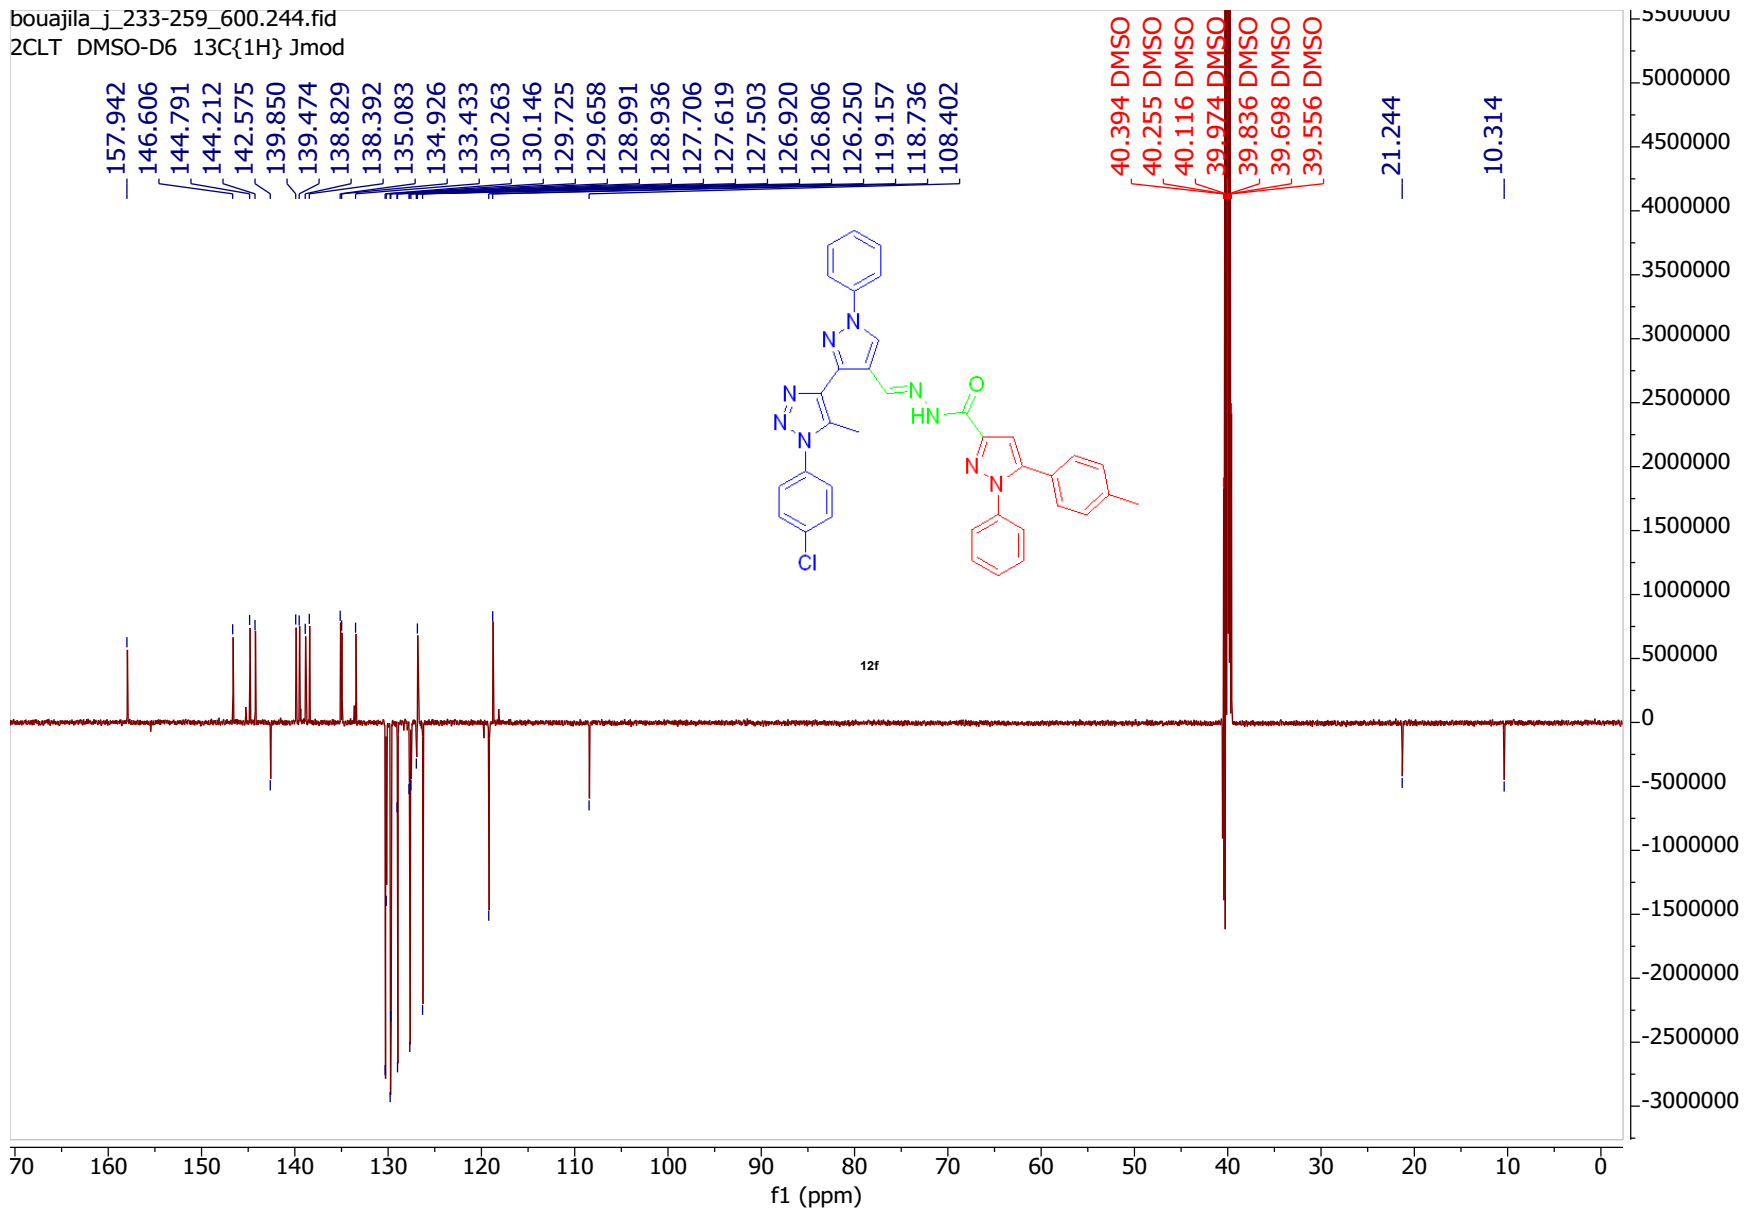

**Figure S 37.**  $^{13}\text{C}$  NMR of compound **12f**



**Figure S 38.**  $^1\text{H}$  NMR of compound **12g**

bouajila\_j\_233-259\_600.252.fid  
3HT DMSO-D6 13C{1H} Jmod

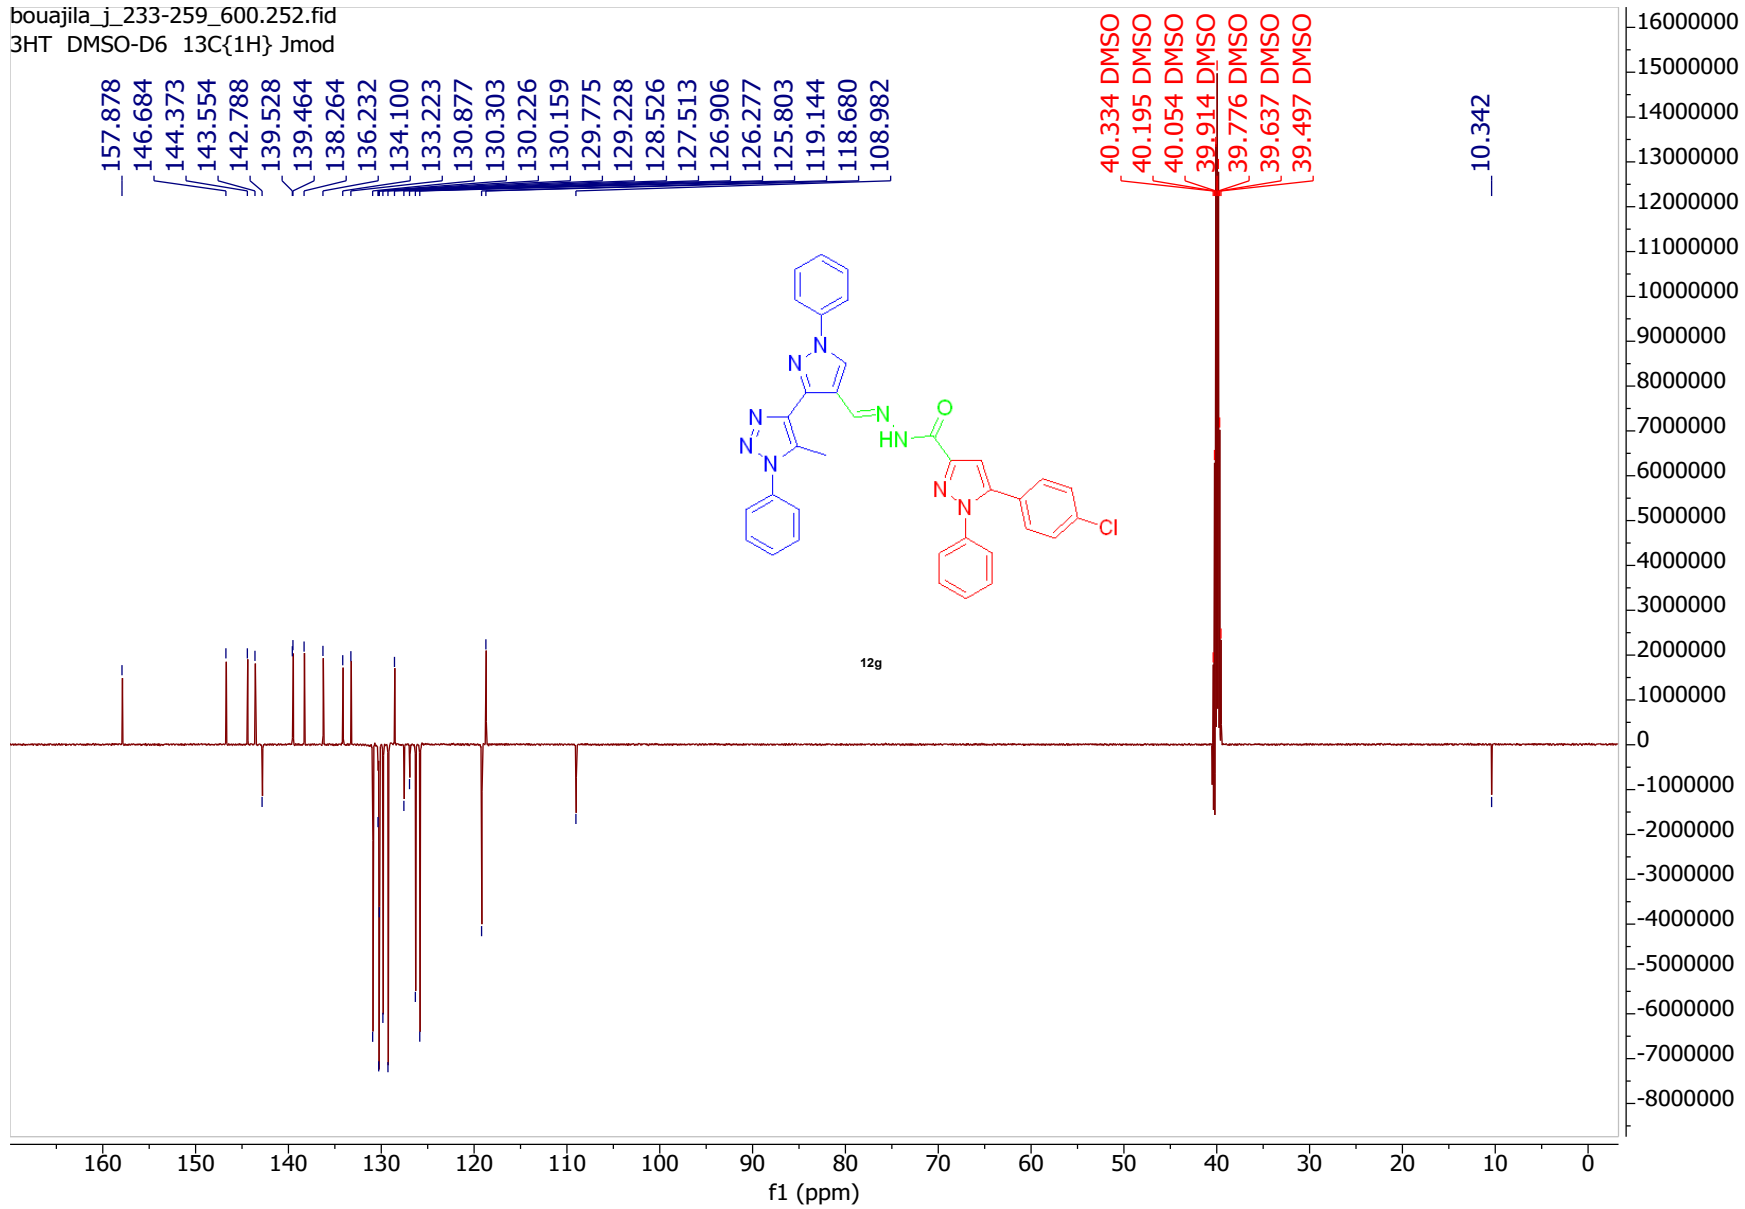

**Figure S 39.**  $^{13}\text{C}$  NMR of compound **12g**

bouajila\_j\_600.208.fid  
3OT Dms0-d6 1H

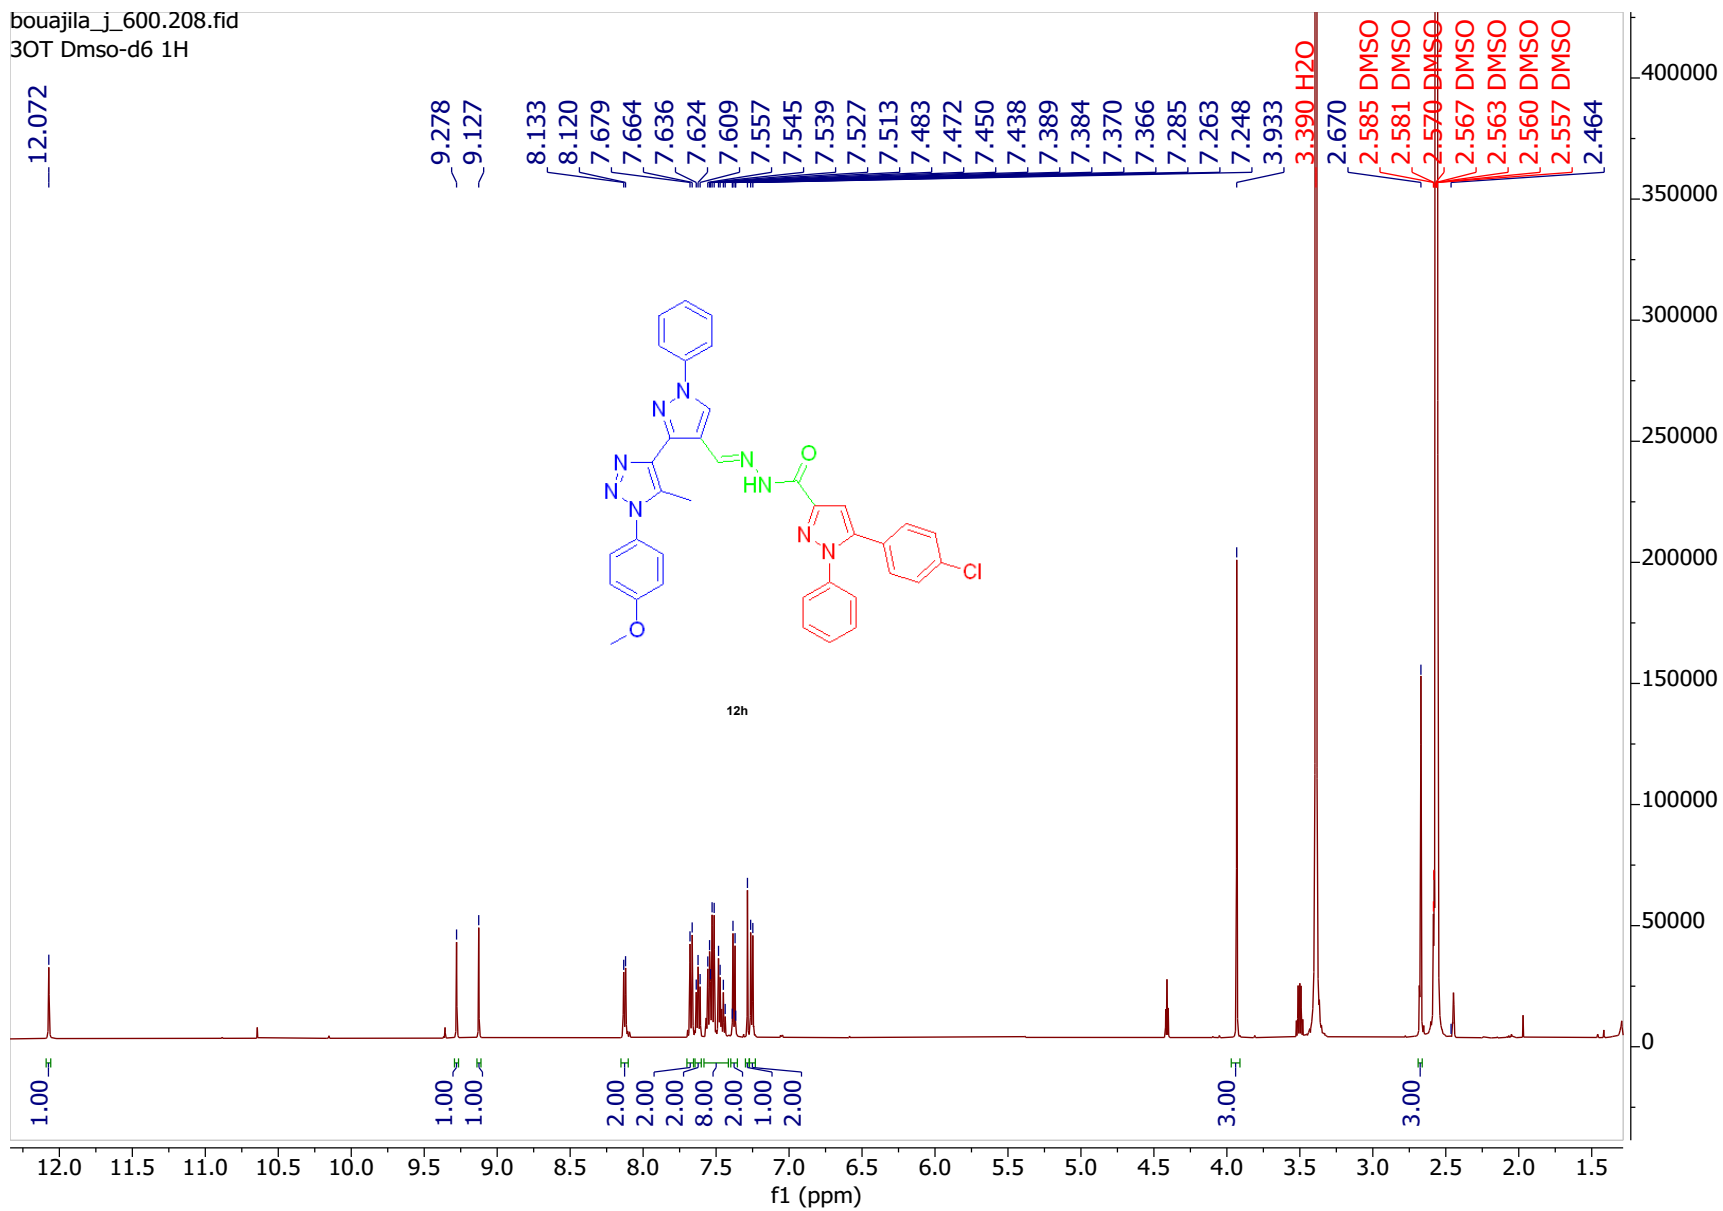

**Figure S 40.**  $^1\text{H}$  NMR of compound **12h**

bouajila\_j\_233-259\_600.254.fid  
3OT DMSO-D6 13C{1H} Jmod

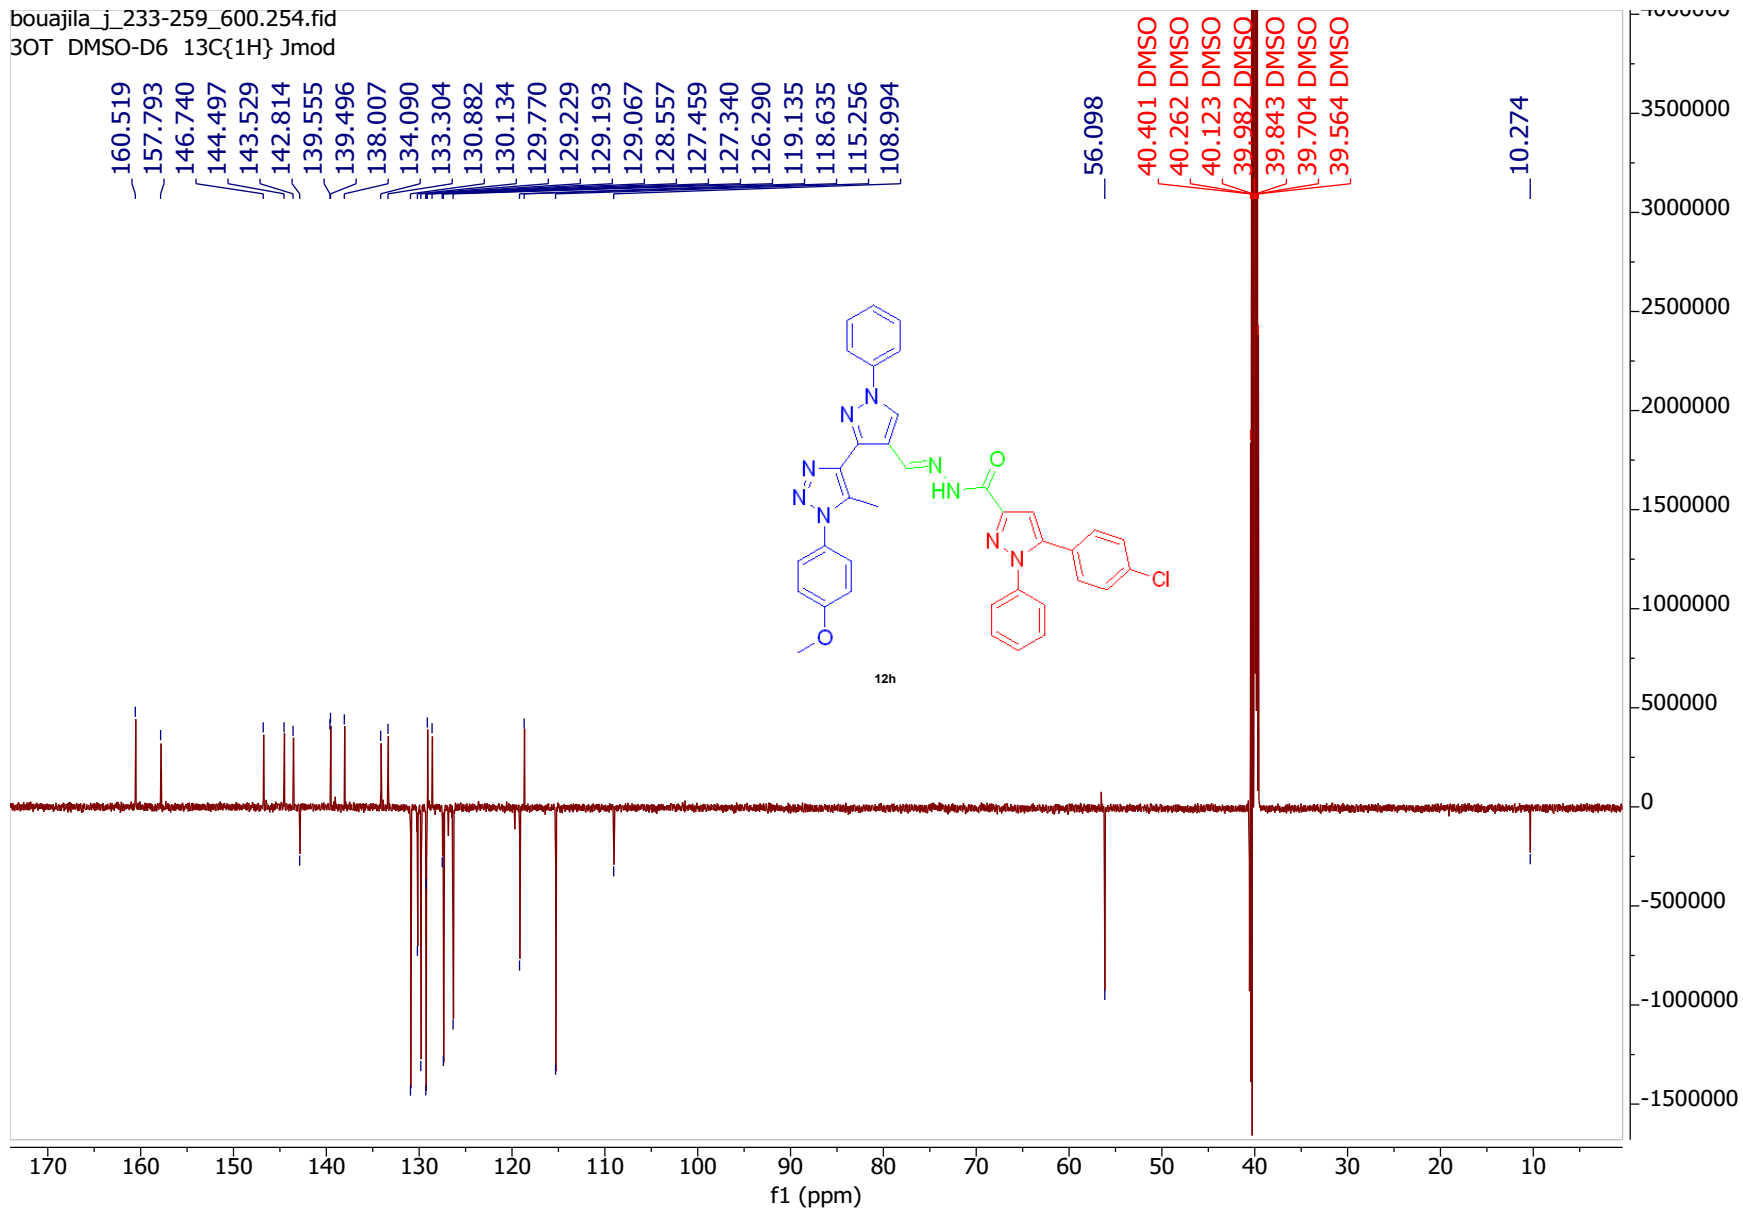

**Figure S 41.**  $^{13}\text{C}$  NMR of compound **12h**

bouajila\_j\_600.204.fid  
3CLT Dms0-d6 1H

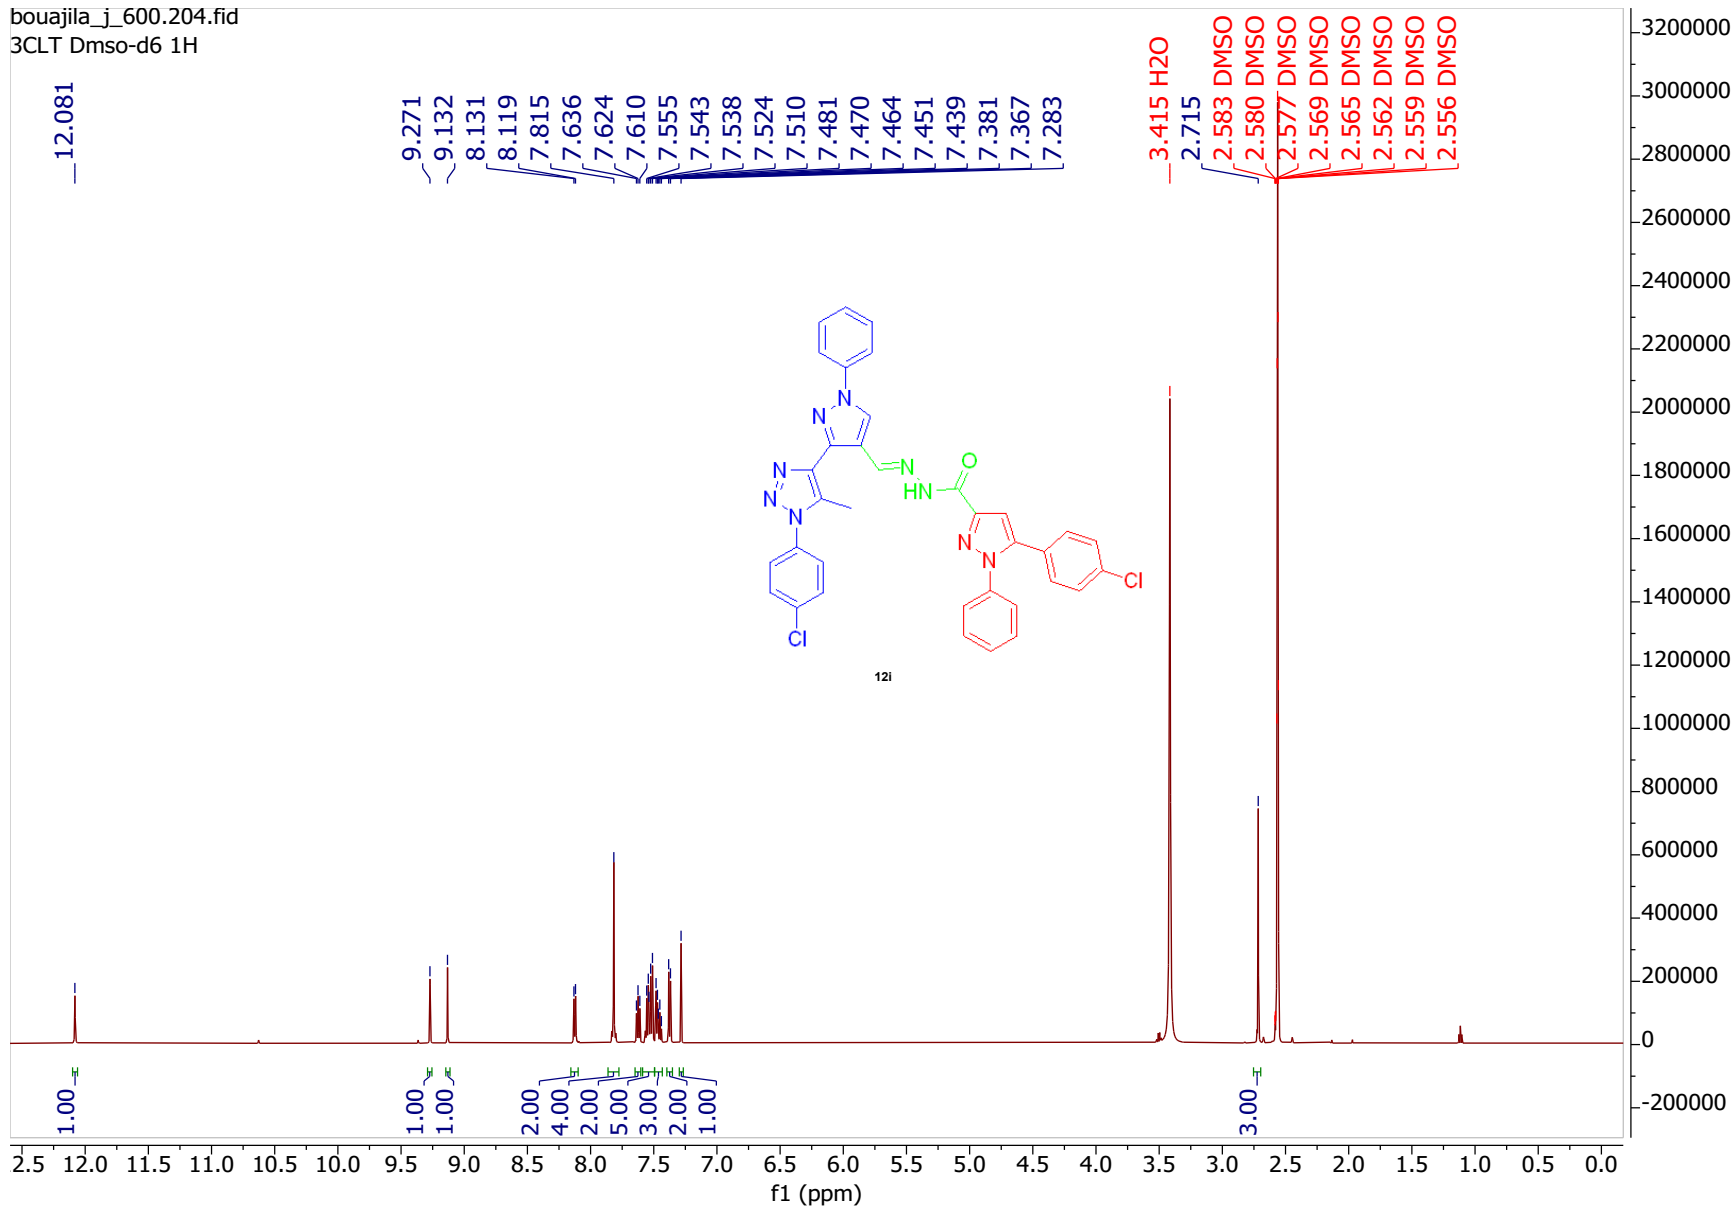

**Figure S 42.**  $^1\text{H}$  NMR of compound **12i**

bouajila\_j\_233-259\_600.250.fid  
3CLT DMSO-D6 13C{1H} Jmod

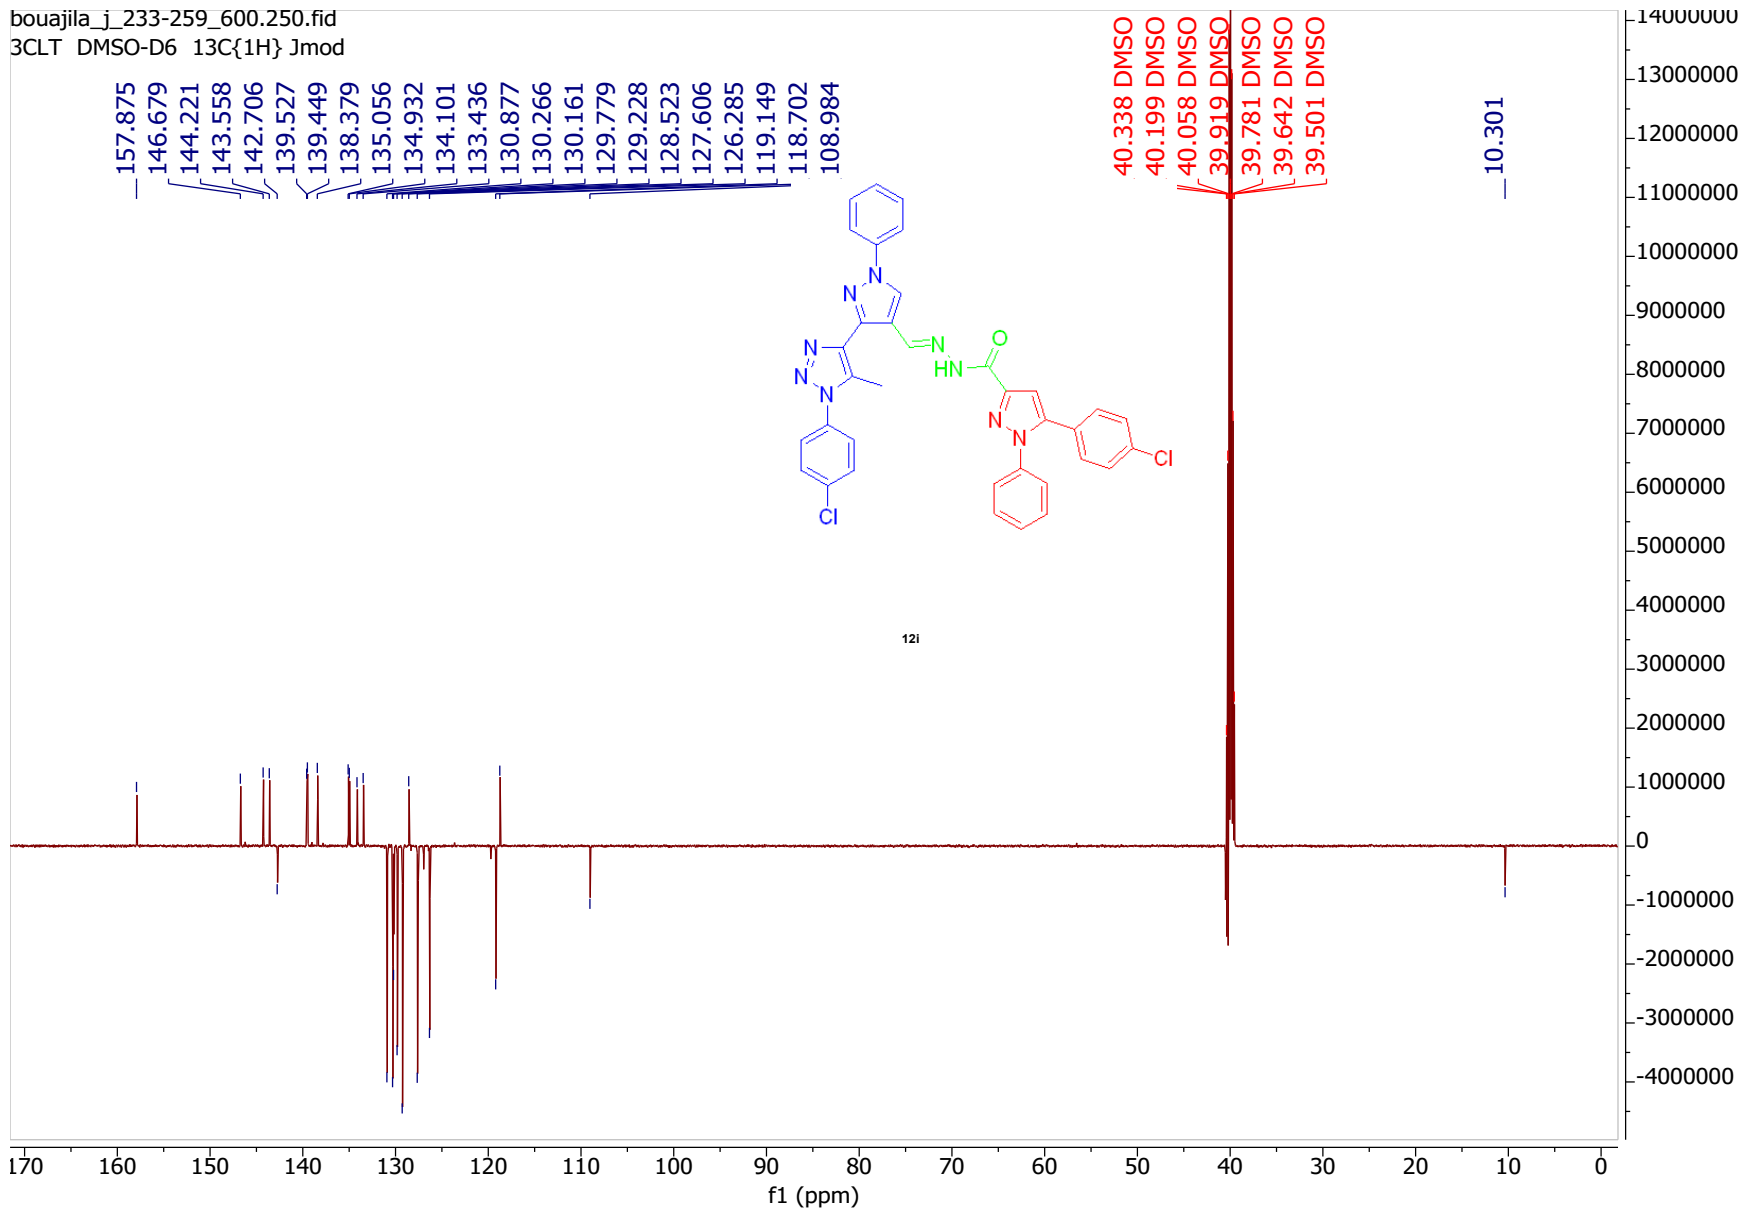

**Figure S43:**  $^{13}\text{C}$  NMR of compound **12i**

# High Resolution Mass Spectroscopy

PY1H#1 RT: 0.01 AV: 1 NL: 6.81E5  
T: FTMS + p ESI Full ms [120.00-2000.00]

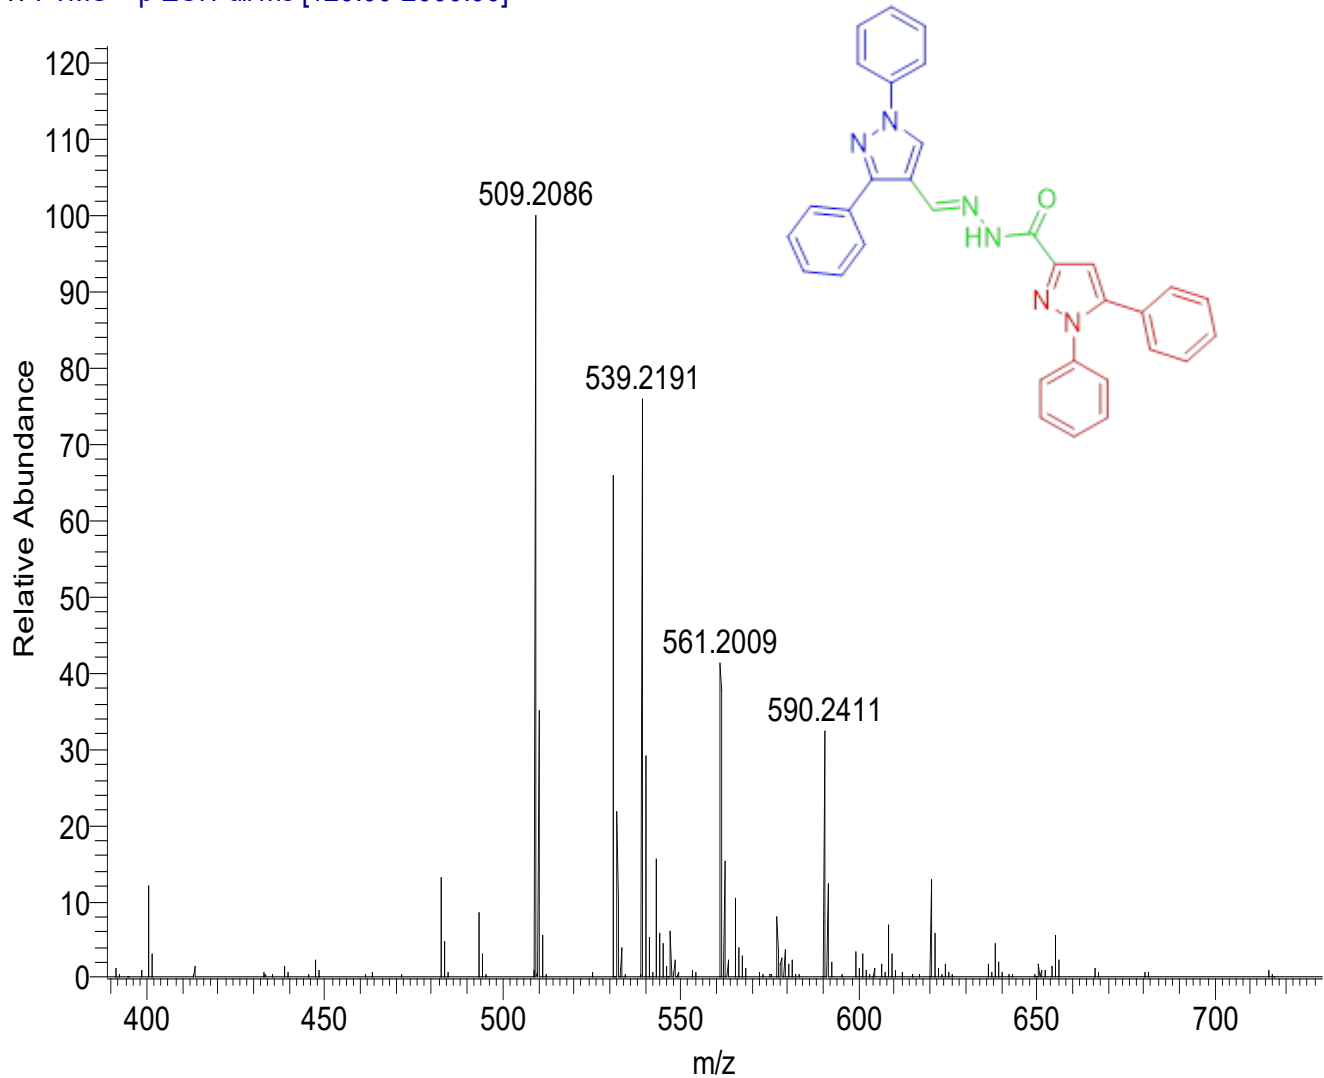

Figure S 44: Mass of compound 8a

PY10 #1 RT: 0.01 AV: 1 NL: 7.01E5  
T: FTMS + p ESI Full ms [120.00-2000.00]

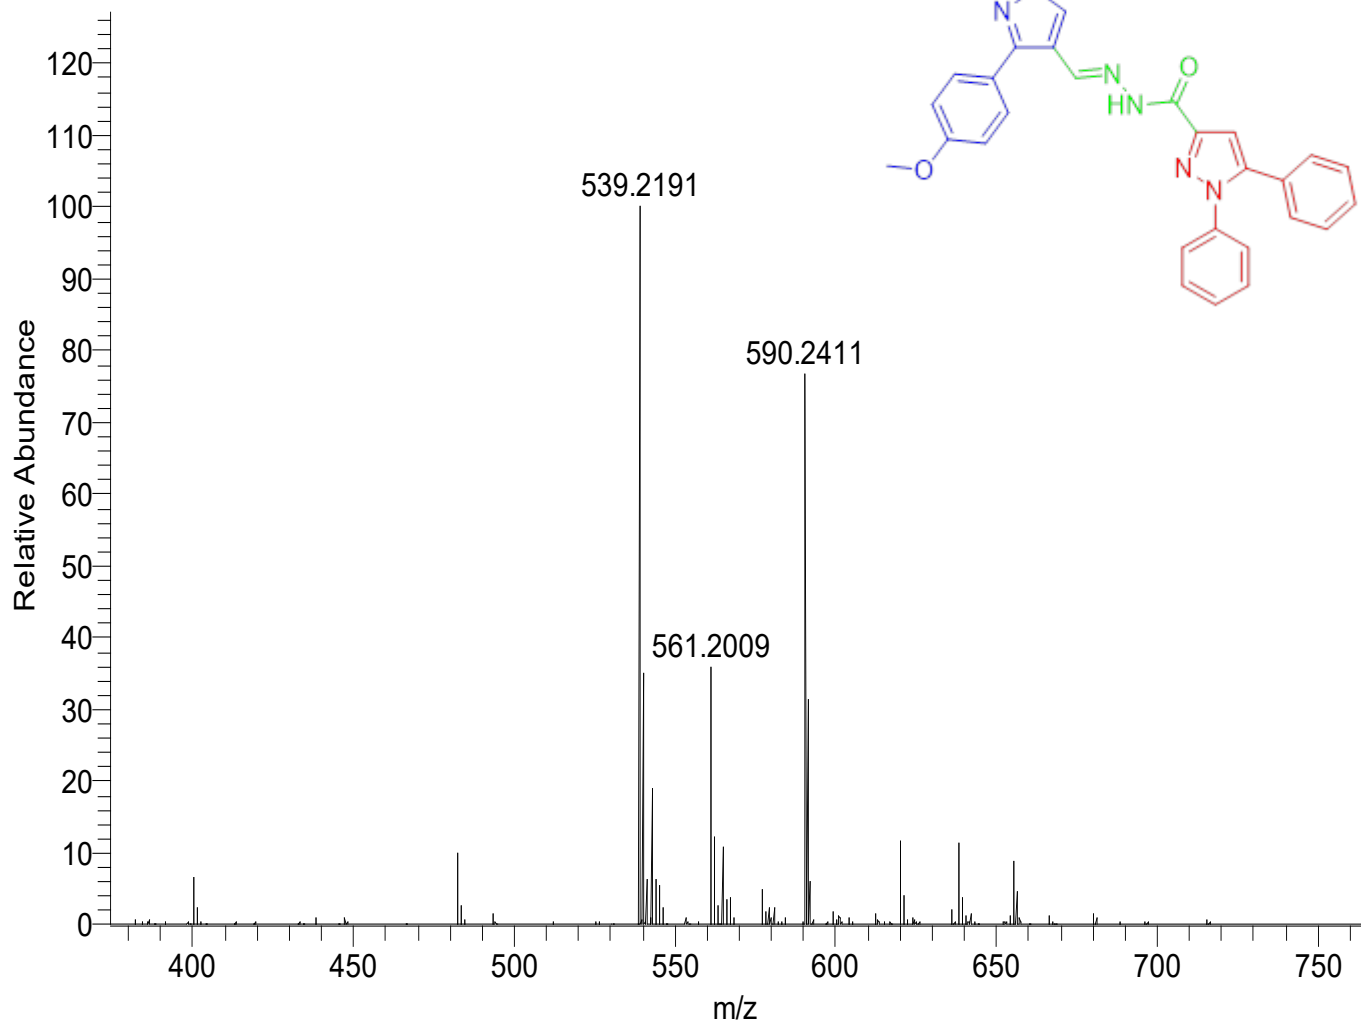

Figure S 45. Mass of compound 8b

PY1CL #1 RT: 0.01 AV: 1 NL: 4.15E5  
T: FTMS + p ESI Full ms [120.00-2000.00]

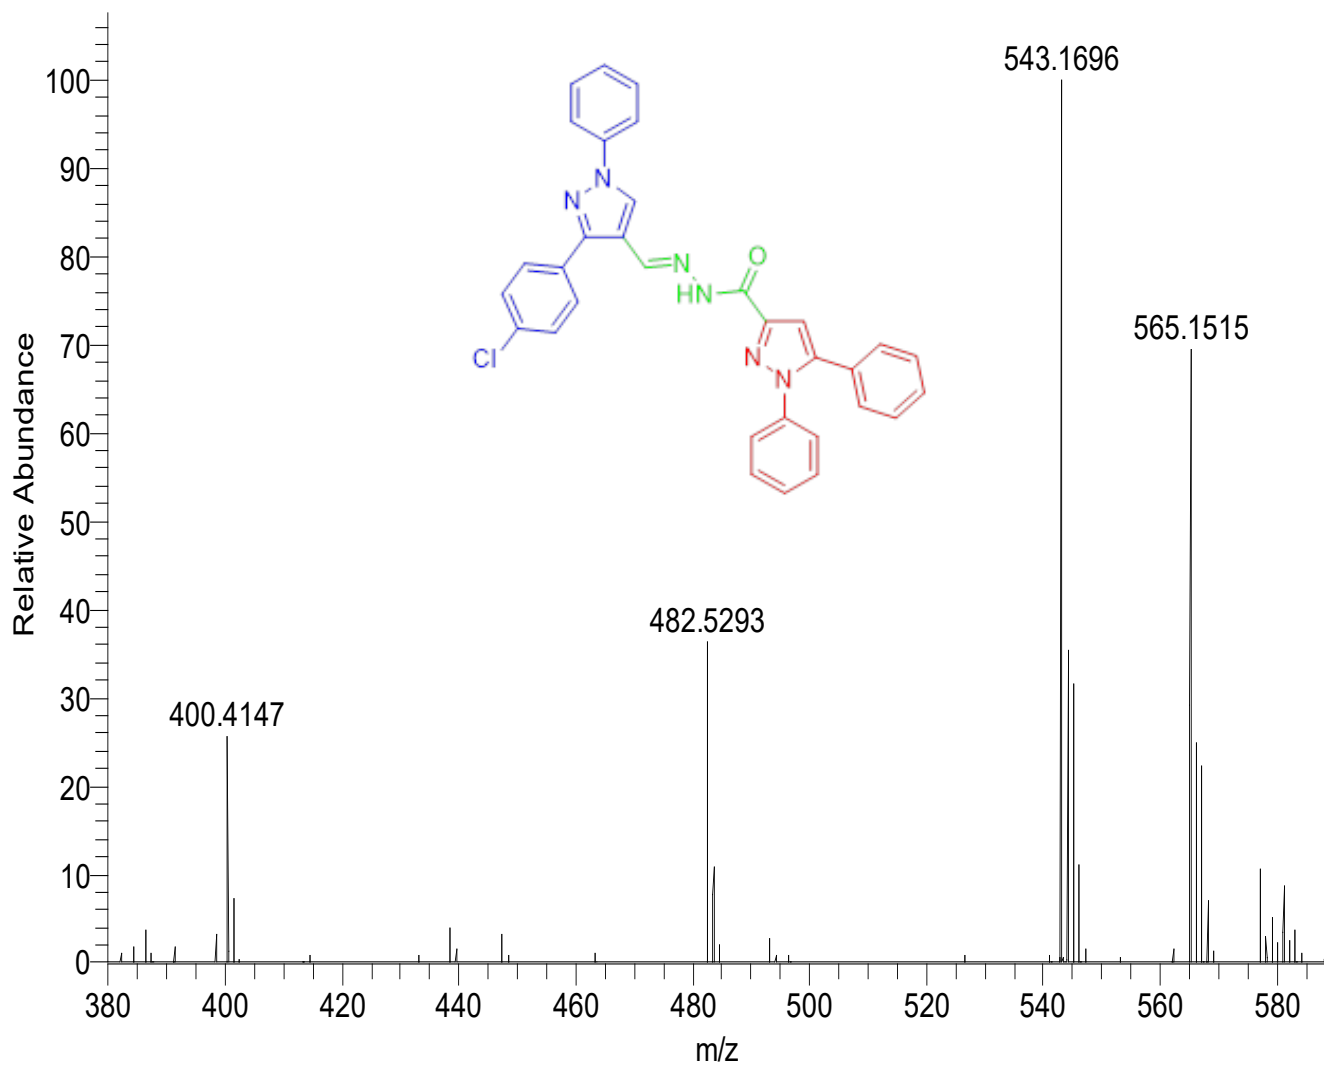

Figure S 46. Mass of compound 8c

PY2H #46 RT: 0.16 AV: 1 NL: 1.22E6  
T: FTMS + p ESI Full ms [120.00-2000.00]

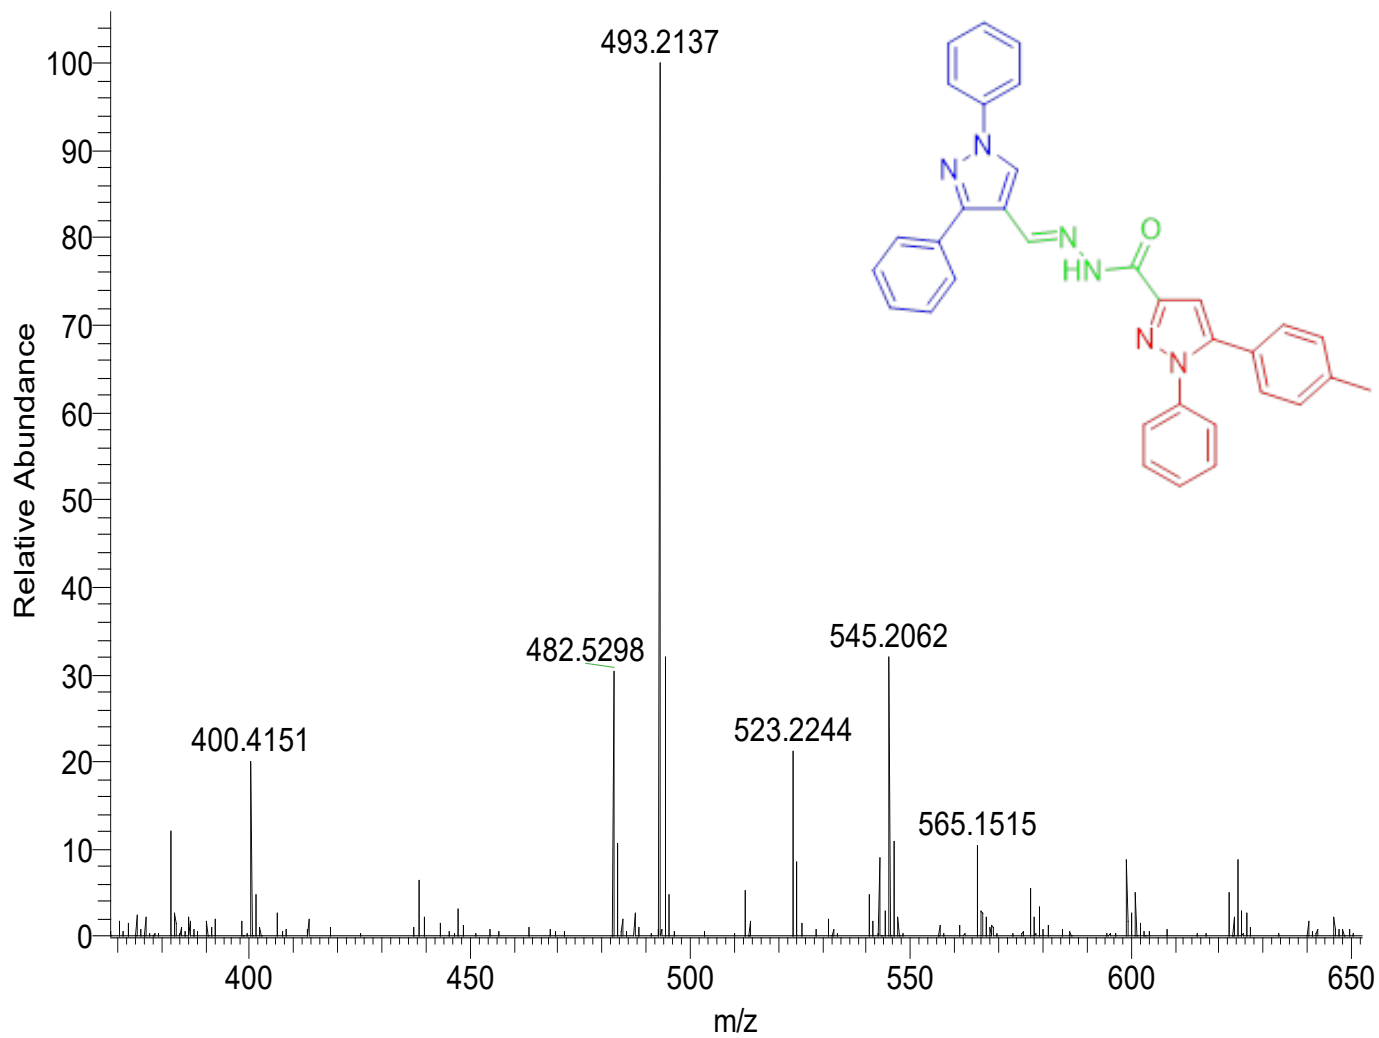

**Figure S 47.** Mass of compound **8d**

PY20 #75 RT: 0.26 AV: 1 NL: 1.04E5  
T: FTMS + p ESI Full ms [120.00-2000.00]

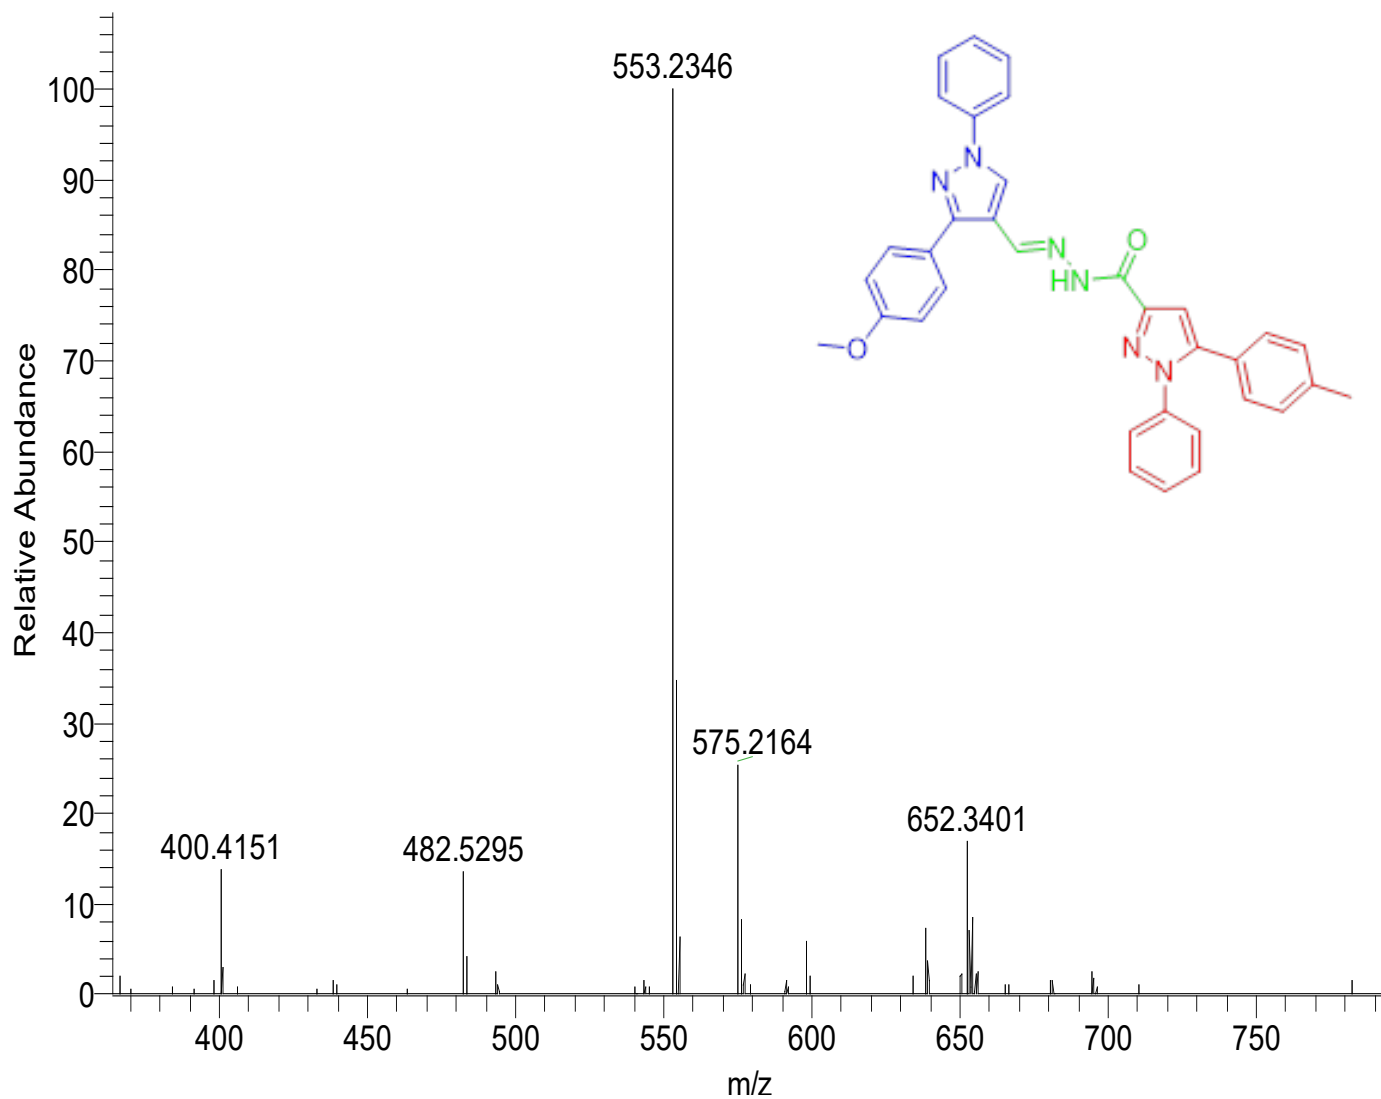

Figure S 48. Mass of compound 8e

PY2CL #69 RT: 0.24 AV: 1 NL: 1.73E4  
T: FTMS + p ESI Full ms [120.00-2000.00]

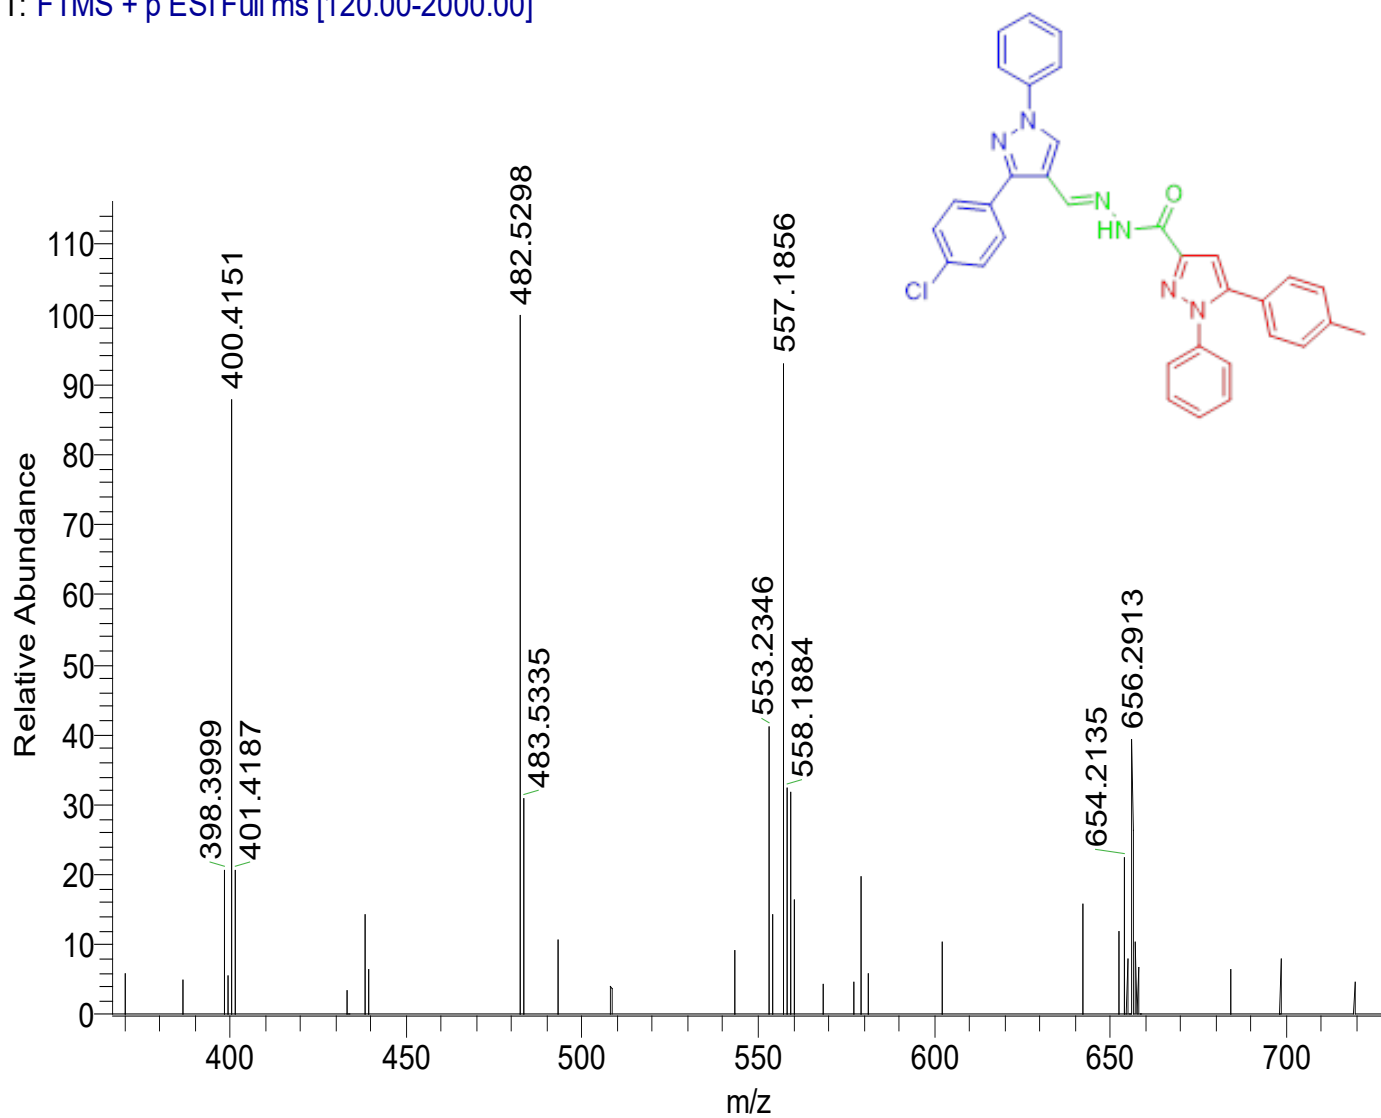

Figure S 49. Mass of compound 8f

PY3H#1 RT: 0.01 AV: 1 NL: 1.68E5  
T: FTMS + p ESI Full ms [120.00-2000.00]

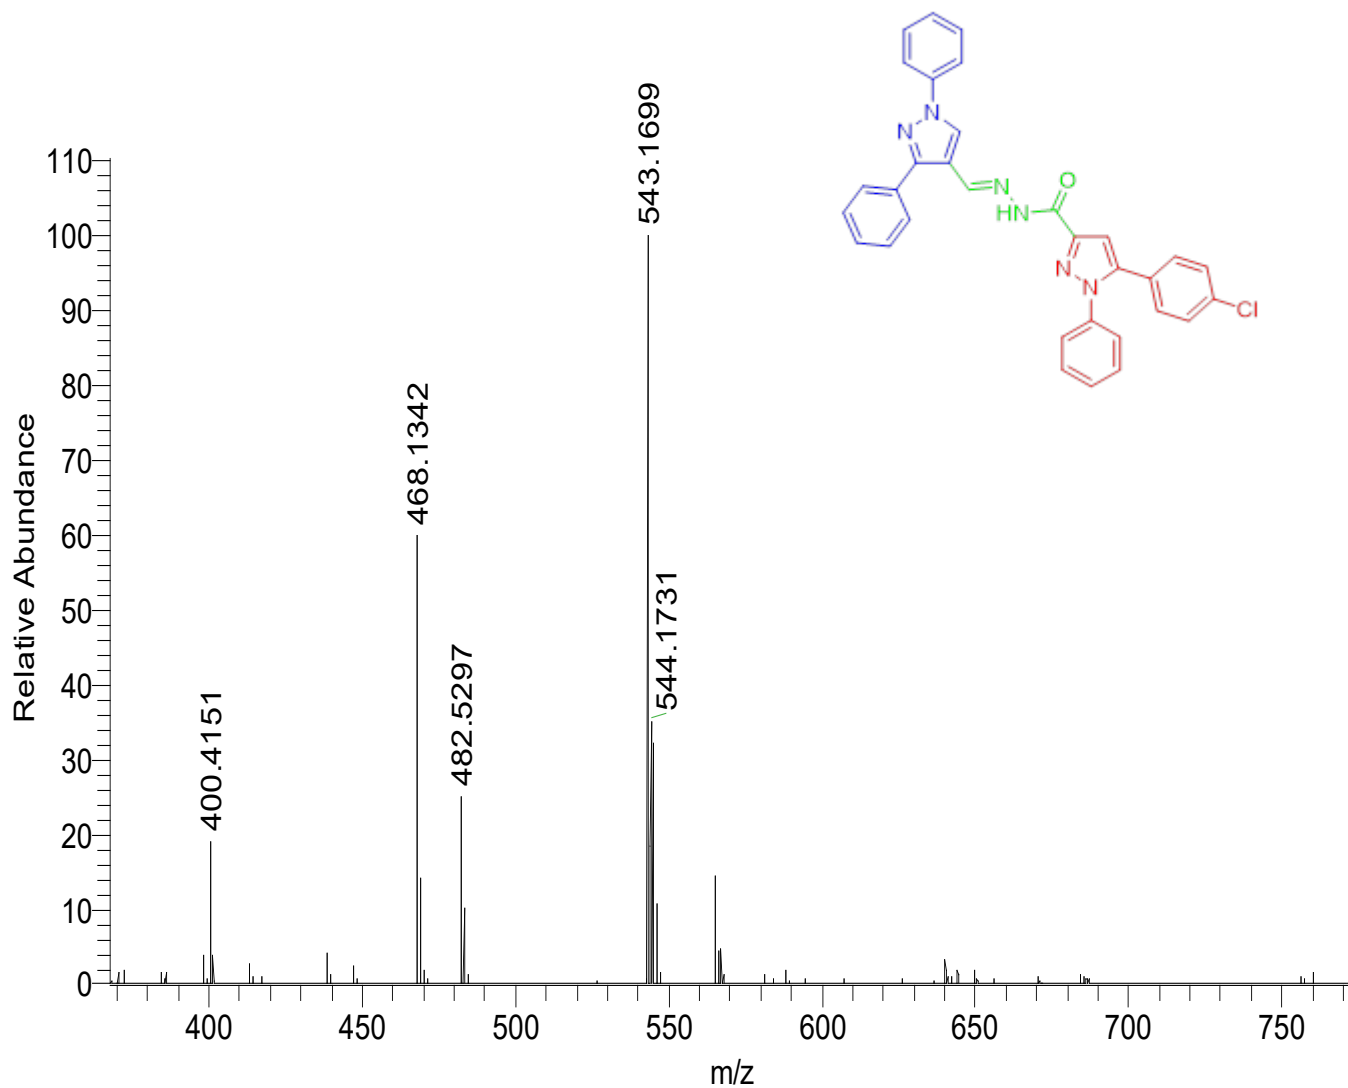

Figure S 50. Mass of compound 8g

PY30 #1 RT: 0.01 AV: 1 NL: 5.86E5  
T: FTMS + p ESI Full ms [120.00-2000.00]

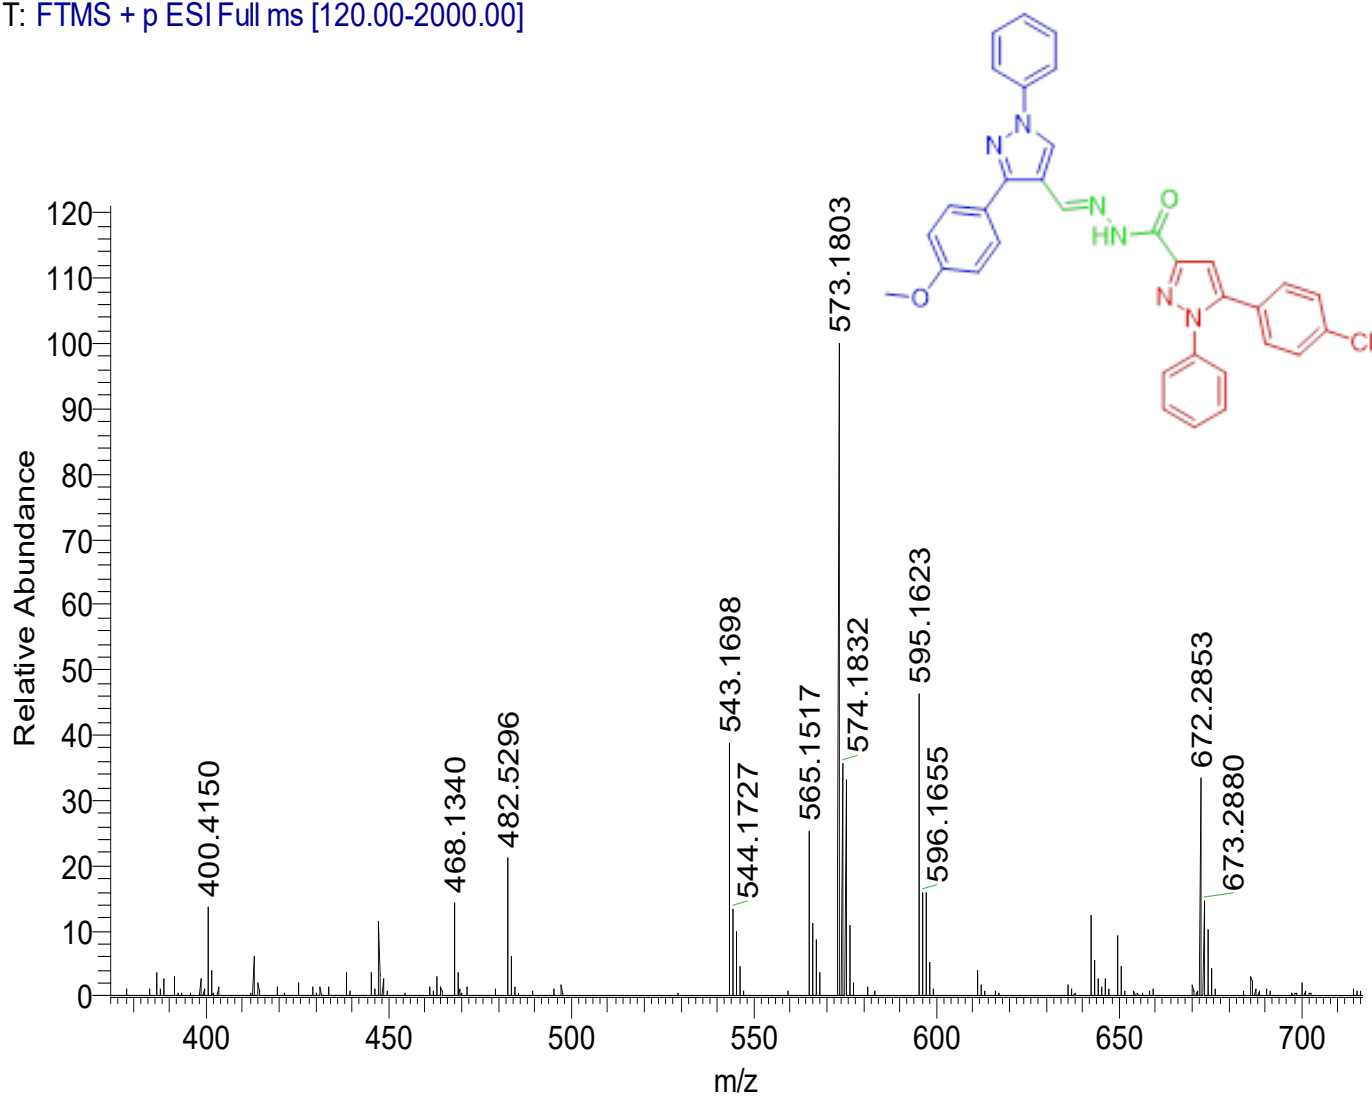

**Figure S 51.** Mass of compound **8h**

PY3CL #125 RT: 0.43 AV: 1 NL: 3.02E6  
T: FTMS + p ESI Full ms [120.00-2000.00]

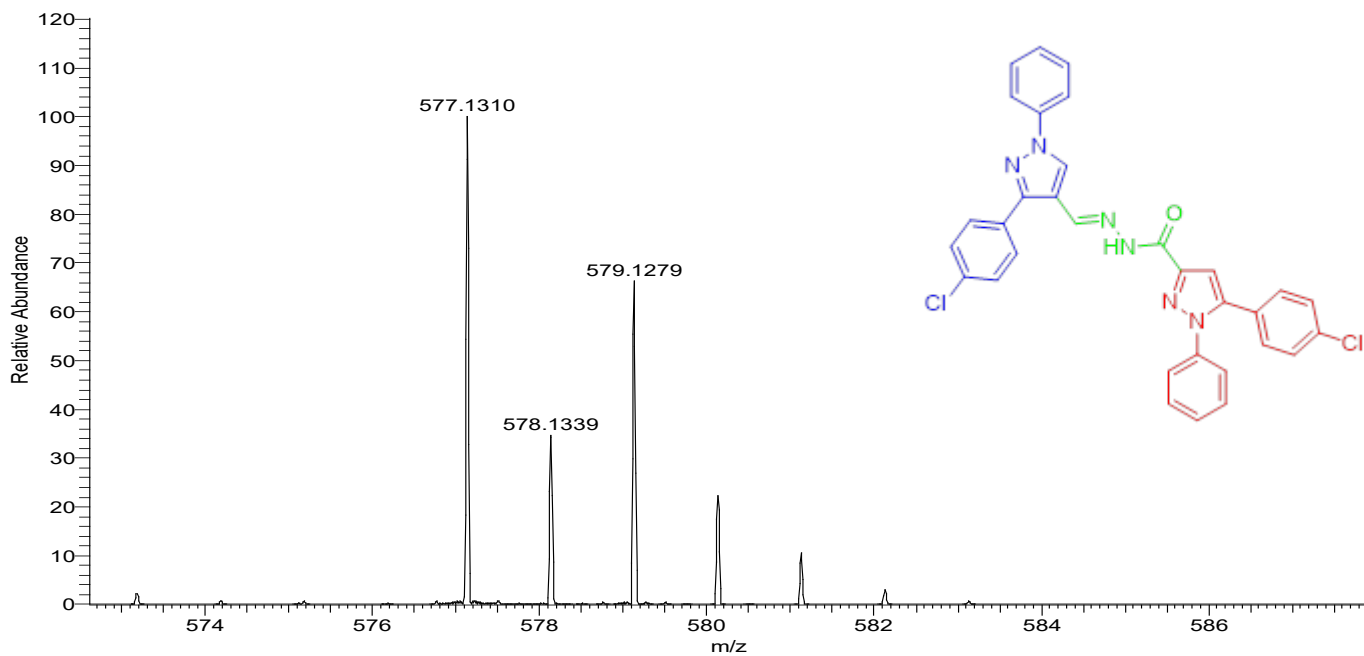

PY3CL #125 RT: 0.43 AV: 1 NL: 3.02E6  
T: FTMS + p ESI Full ms [120.00-2000.00]

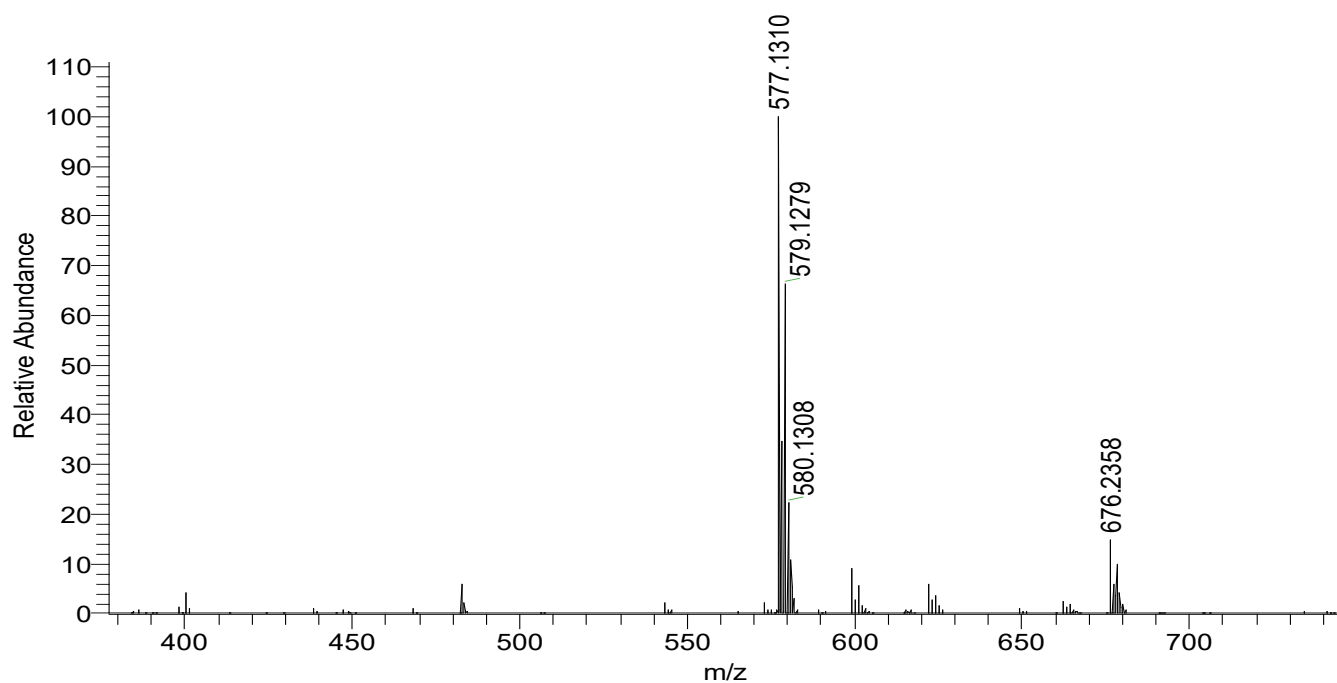

Figure S 52. Mass of compound 8i

PY1HT #165 RT: 0.56 AV: 1 NL: 7.02E6  
T: FTMS + p ESI Full ms [120.00-2000.00]

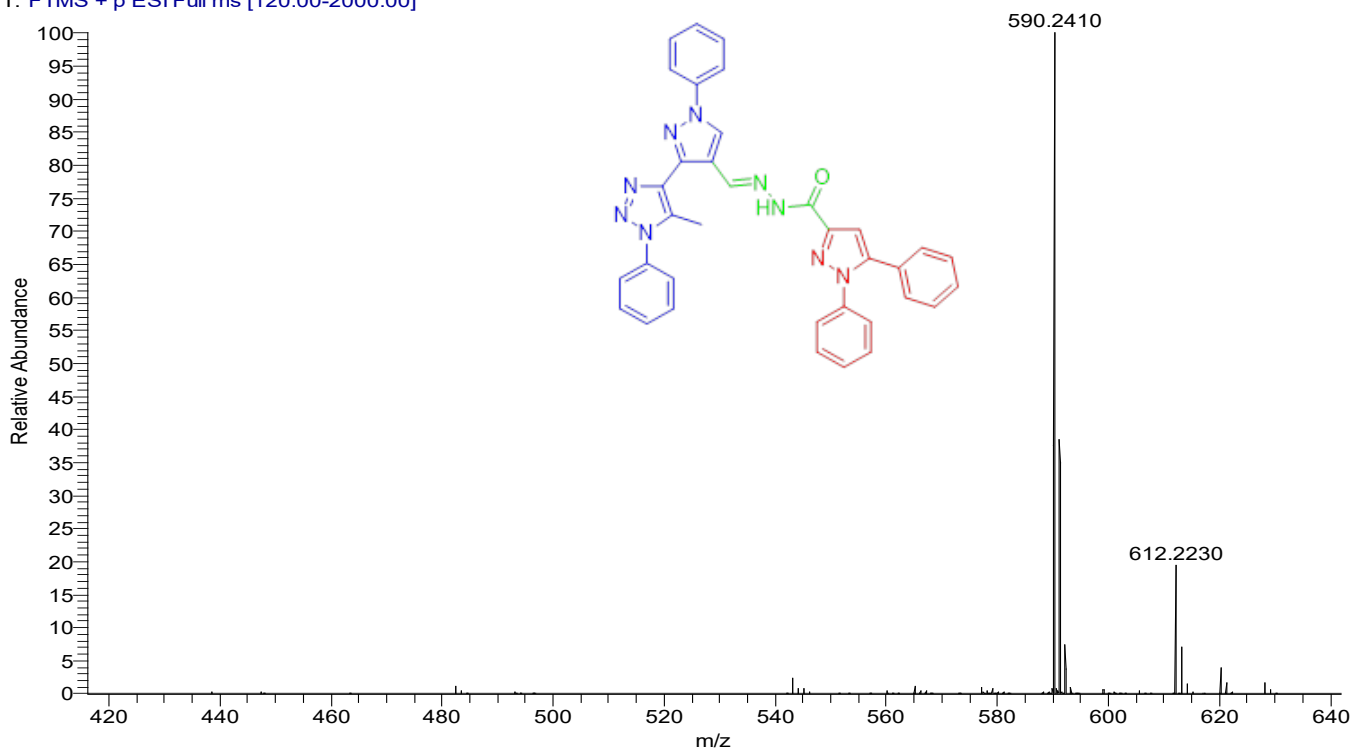

PY1HT #165 RT: 0.56 AV: 1 NL: 7.02E6  
T: FTMS + p ESI Full ms [120.00-2000.00]

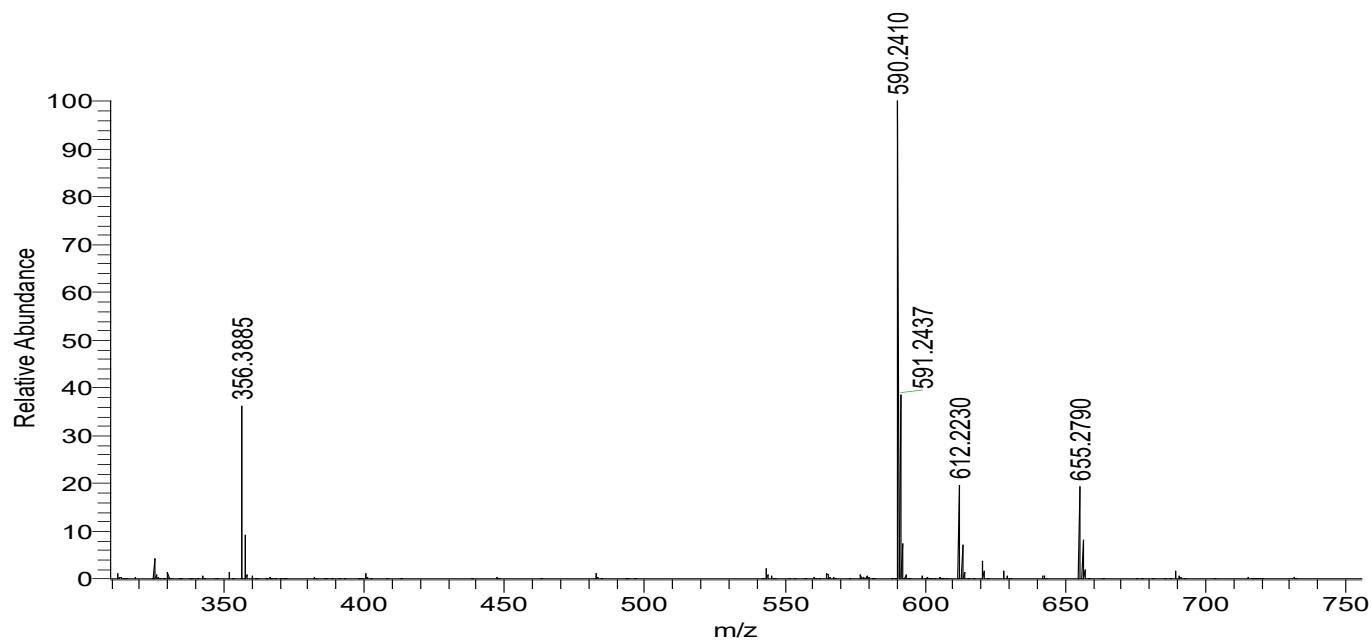

Figure S 53. Mass of compound 12a

PY1OT #1 RT: 0.01 AV: 1 NL: 2.77E6  
T: FTMS + p ESI Full ms [120.00-2000.00]

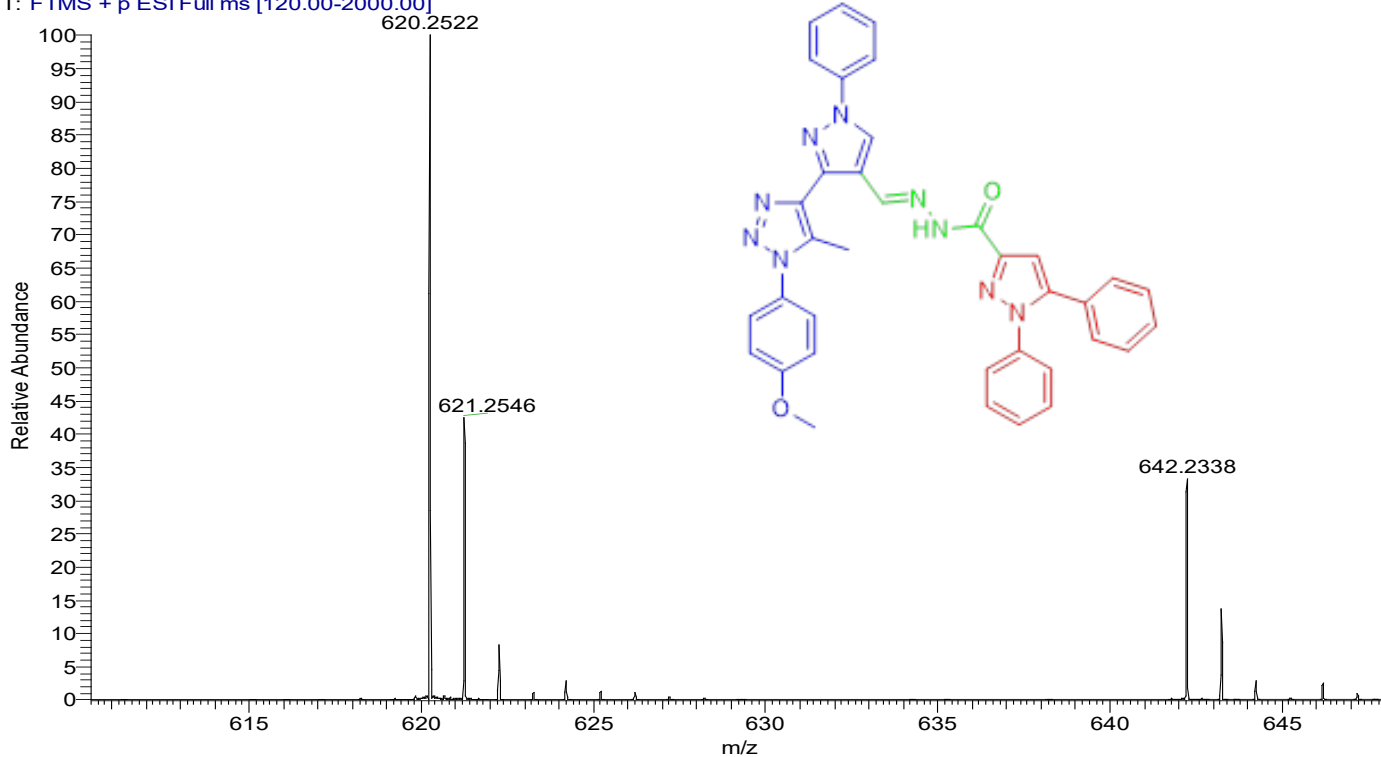

PY1OT #1 RT: 0.01 AV: 1 NL: 2.77E6  
T: FTMS + p ESI Full ms [120.00-2000.00]

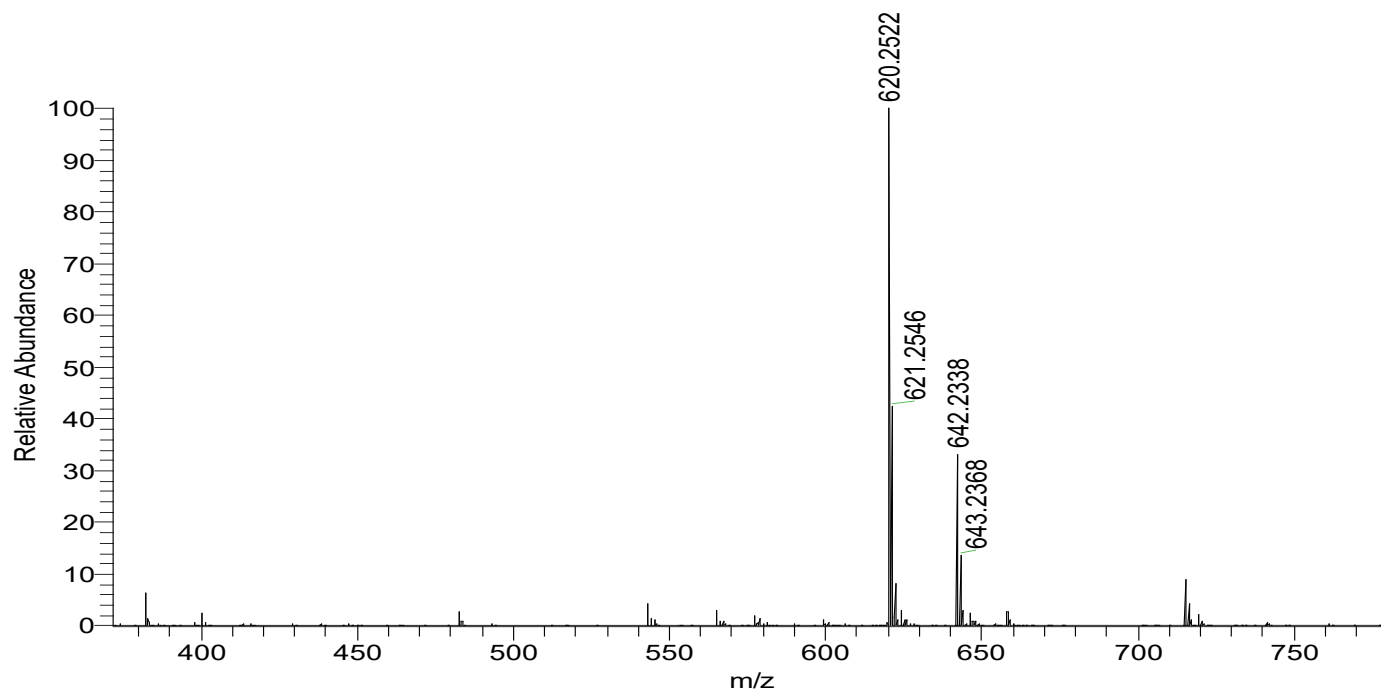

Figure S 54. Mass of compound 12b

PY1CLT #173 RT: 0.59 AV: 1 NL: 1.24E6  
T: FTMS + p ESI Full ms [120.00-2000.00]

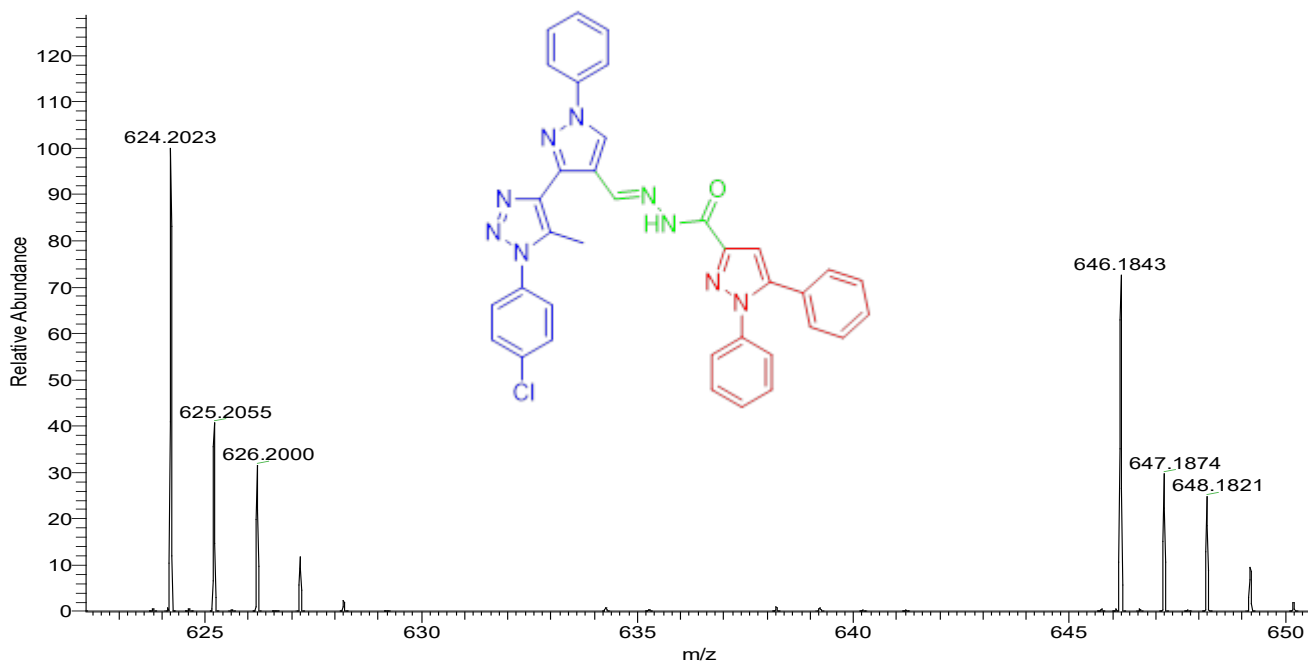

PY1CLT #173 RT: 0.59 AV: 1 NL: 1.24E6  
T: FTMS + p ESI Full ms [120.00-2000.00]

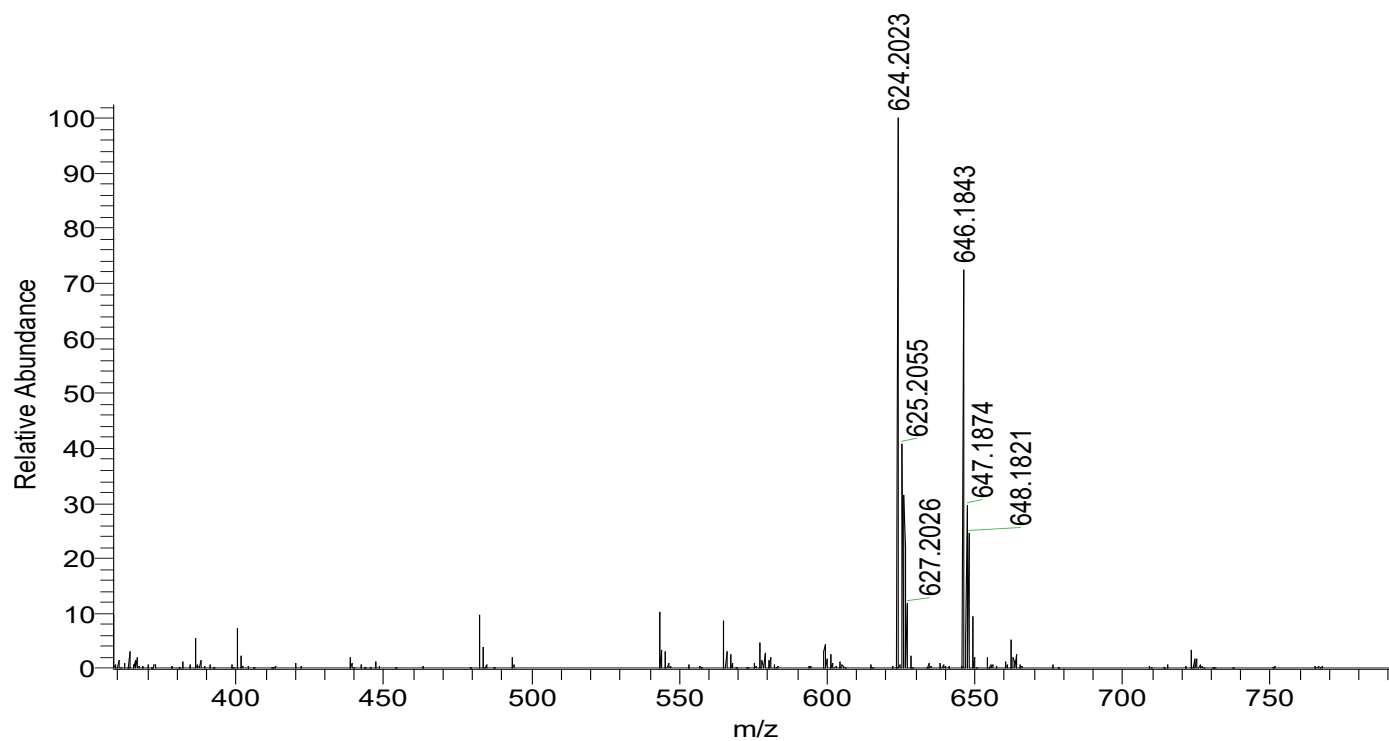

Figure S 55. Mass of compound 12c

PY2HT #78 RT: 0.27 AV: 1 NL: 1.74E5  
T: FTMS + p ESI Full ms [120.00-2000.00]

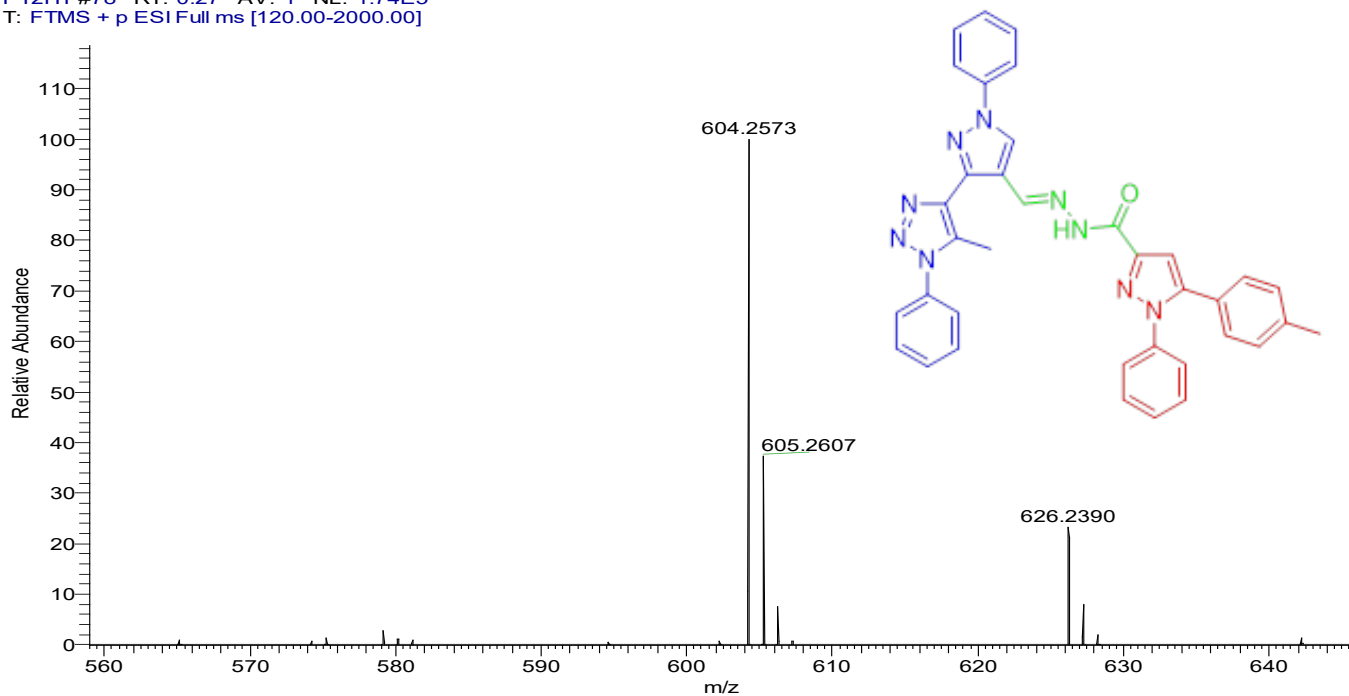

PY2HT #78 RT: 0.27 AV: 1 NL: 1.74E5  
T: FTMS + p ESI Full ms [120.00-2000.00]

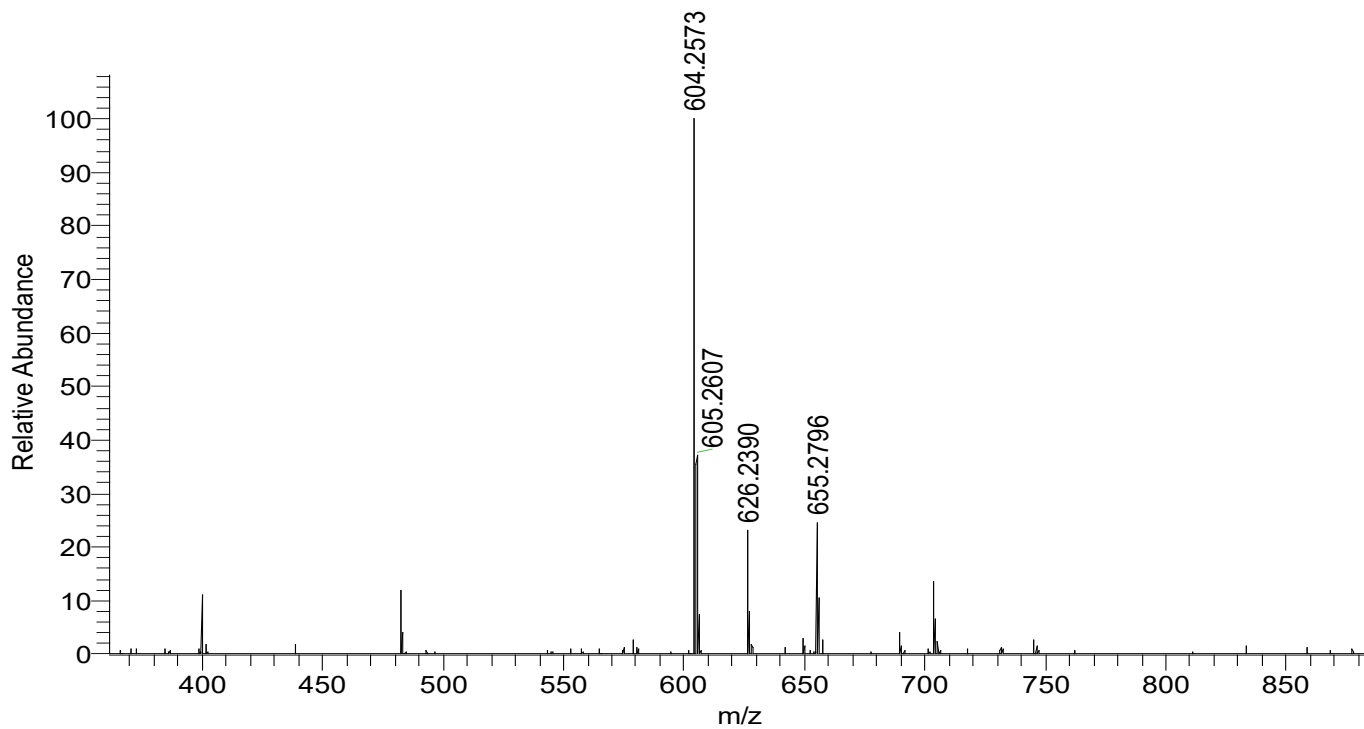

Figure S 56. Mass of compound 12d

PY2OT #101 RT: 0.34 AV: 1 NL: 3.63E5  
T: FTMS + p ESI Full ms [120.00-2000.00]

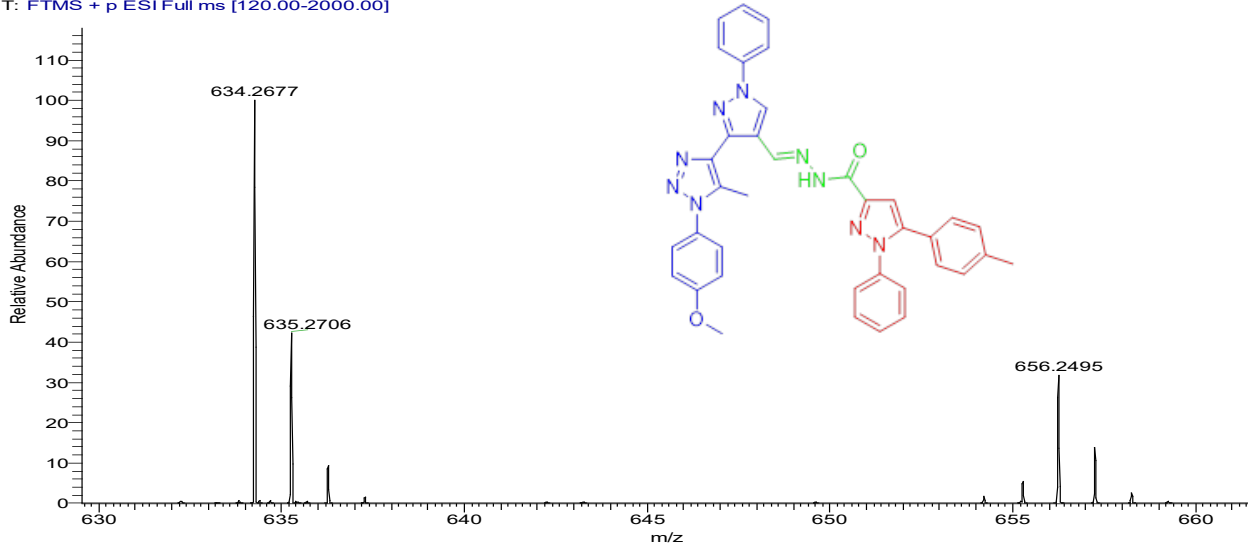

PY2OT #101 RT: 0.34 AV: 1 NL: 3.63E5  
T: FTMS + p ESI Full ms [120.00-2000.00]

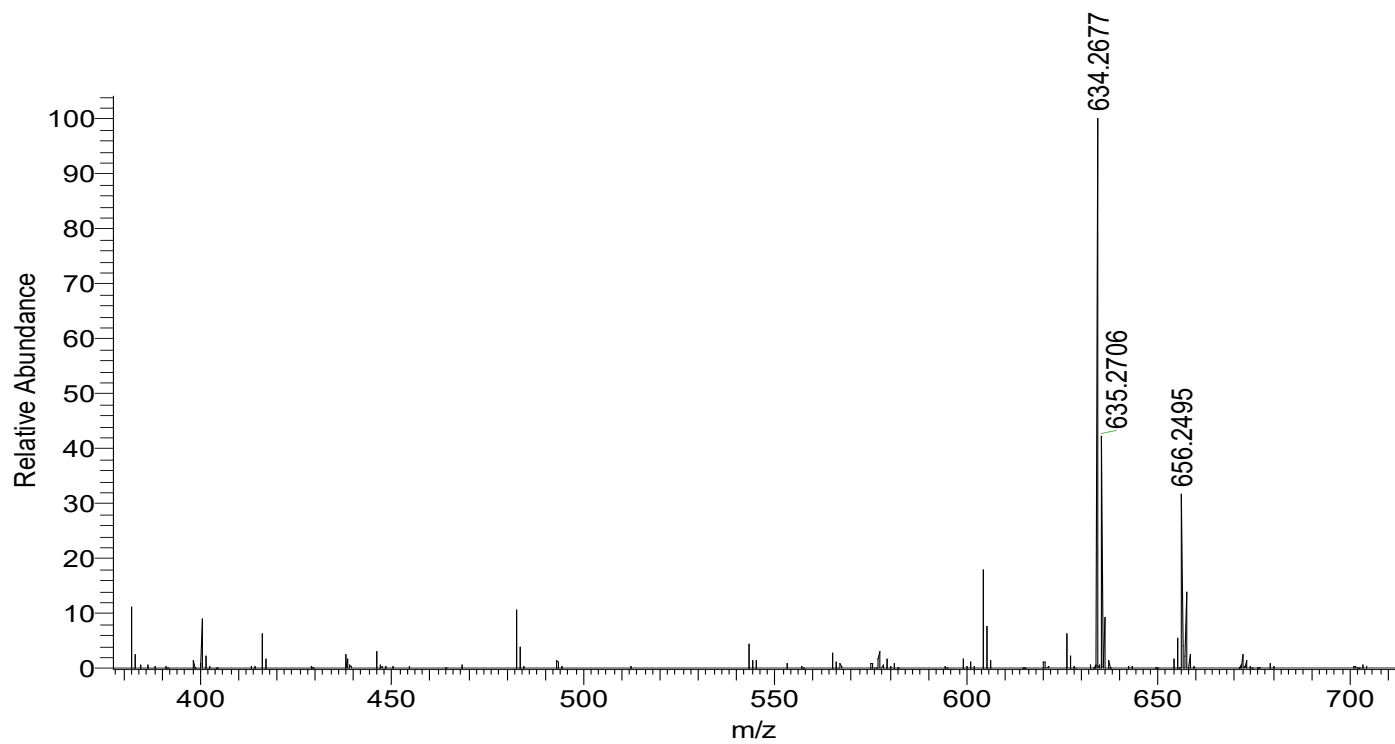

Figure S 57. Mass of compound 12e

PY2CLT #146 RT: 0.50 AV: 1 NL: 1.15E6  
T: FTMS + p ESI Full ms [120.00-2000.00]

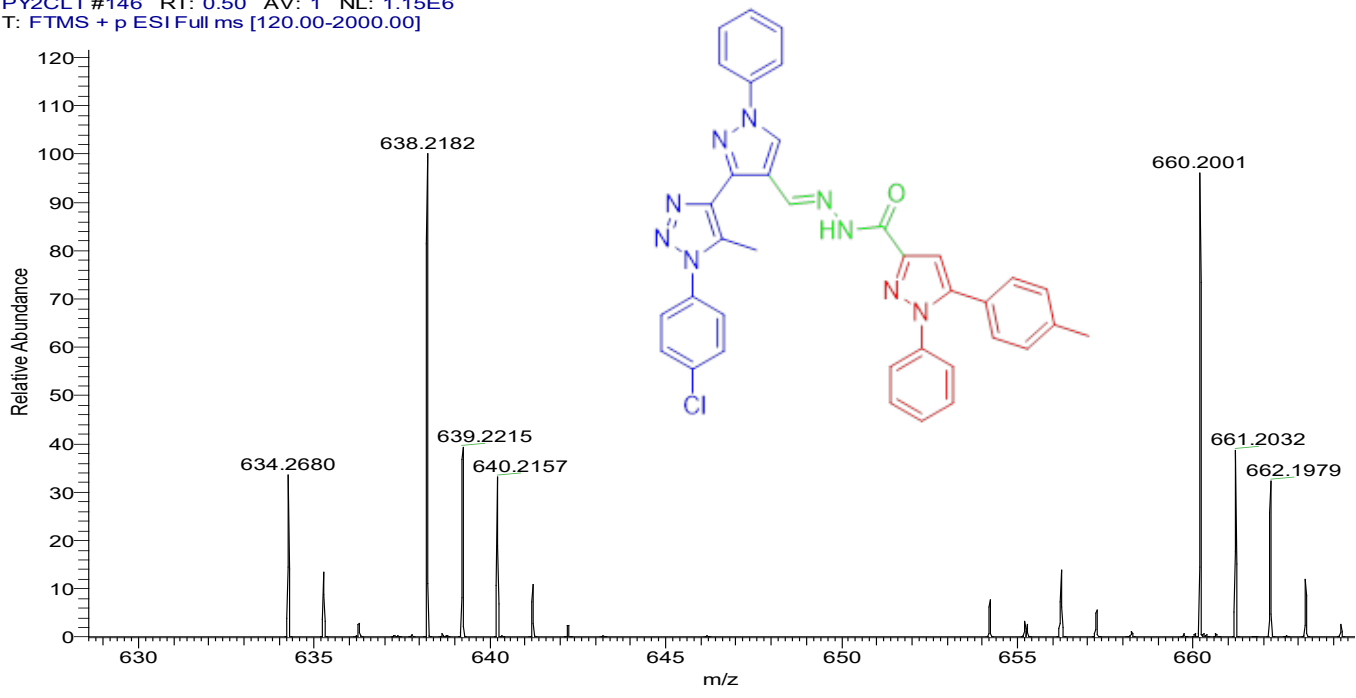

PY2CLT #146 RT: 0.50 AV: 1 NL: 1.15E6  
T: FTMS + p ESI Full ms [120.00-2000.00]

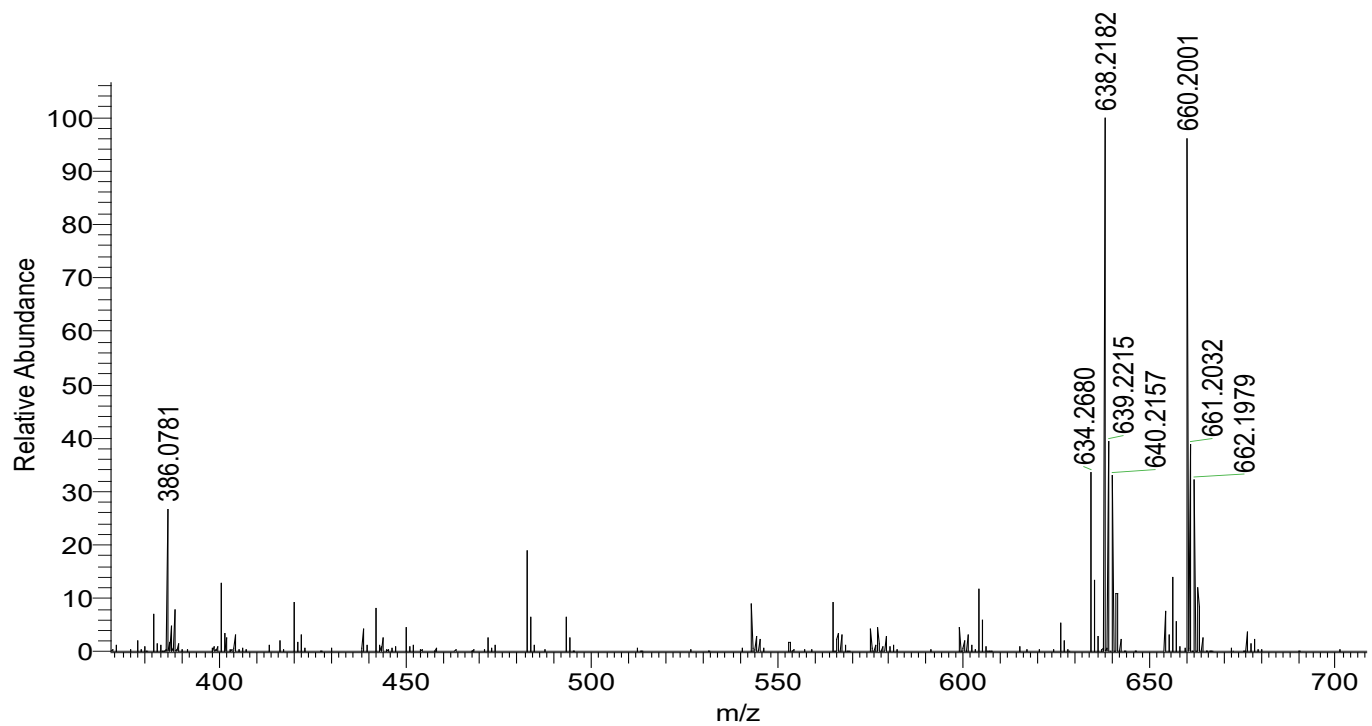

Figure S 58. Mass of compound 12f

PY3HT #1 RT: 0.01 AV: 1 NL: 1.47E6  
T: FTMS + p ESI Full ms [120.00-2000.00]

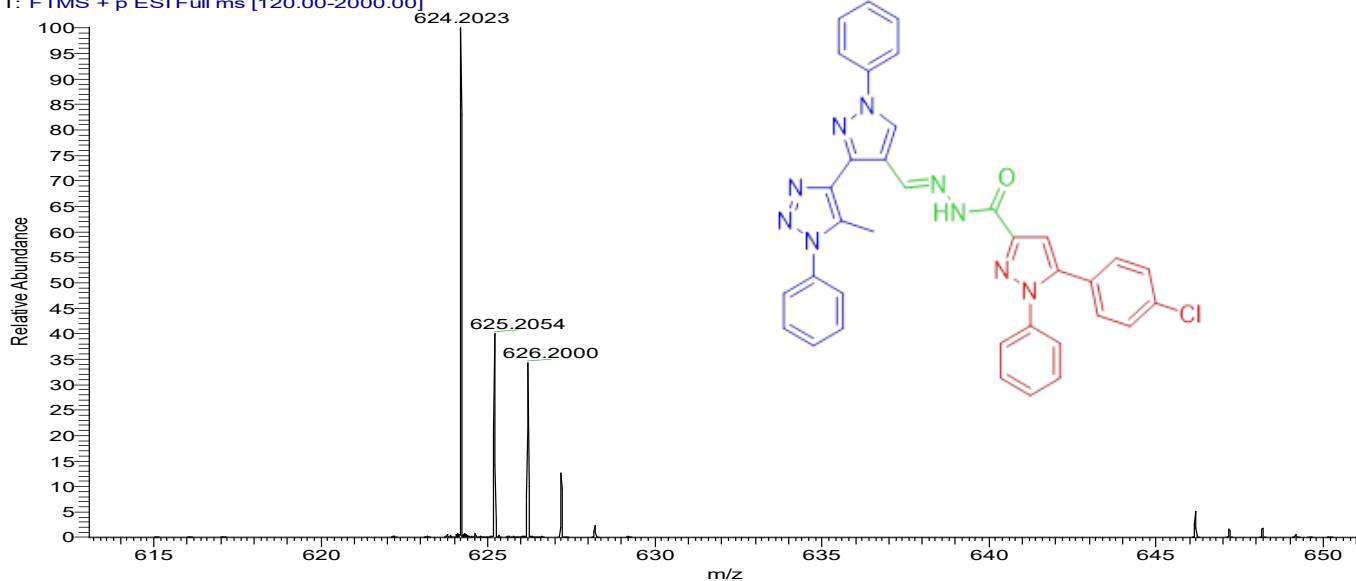

PY3HT #1 RT: 0.01 AV: 1 NL: 1.47E6  
T: FTMS + p ESI Full ms [120.00-2000.00]

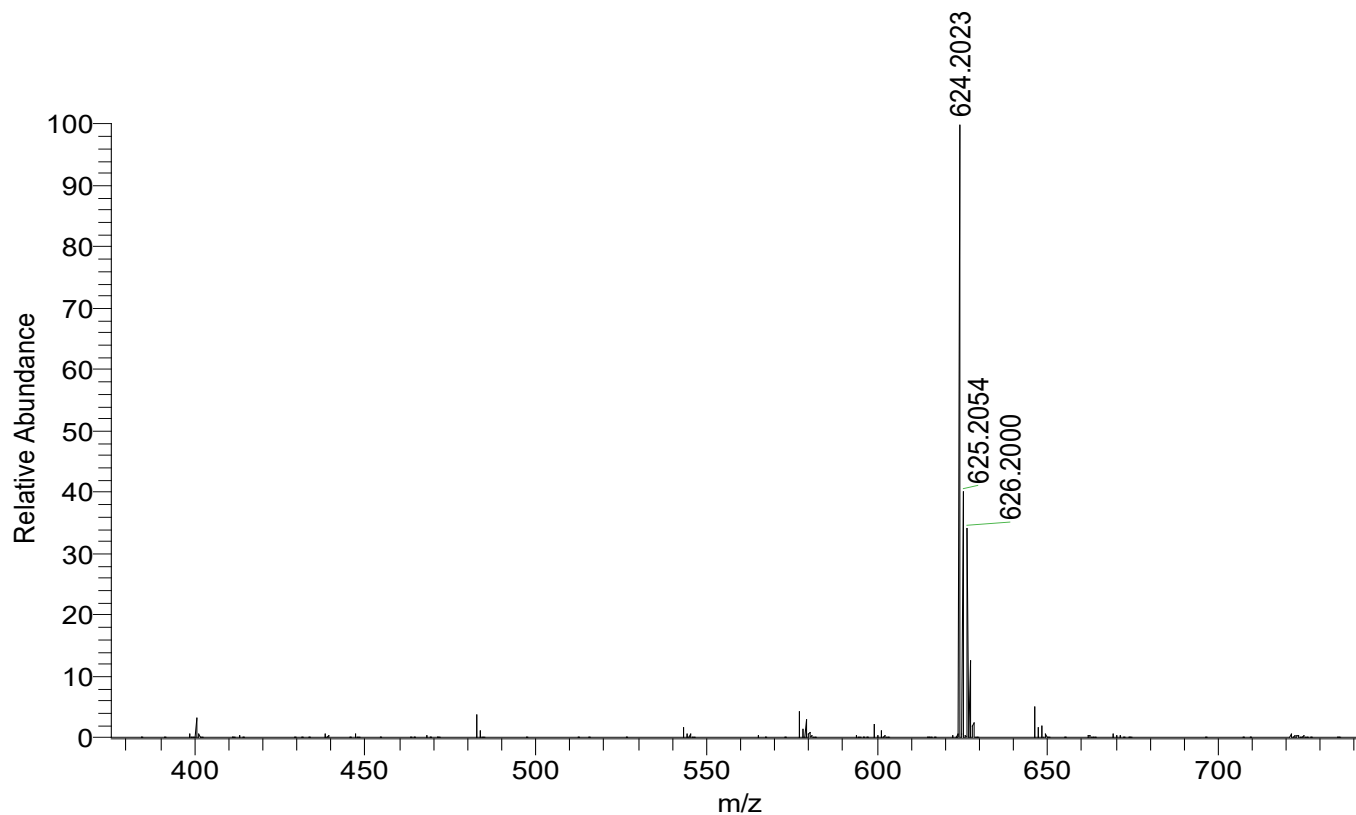

Figure S 59. Mass of compound 12g

PY3OT #150 RT: 0.51 AV: 1 NL: 8.77E4  
T: FTMS + p ESI Full ms [120.00-2000.00]

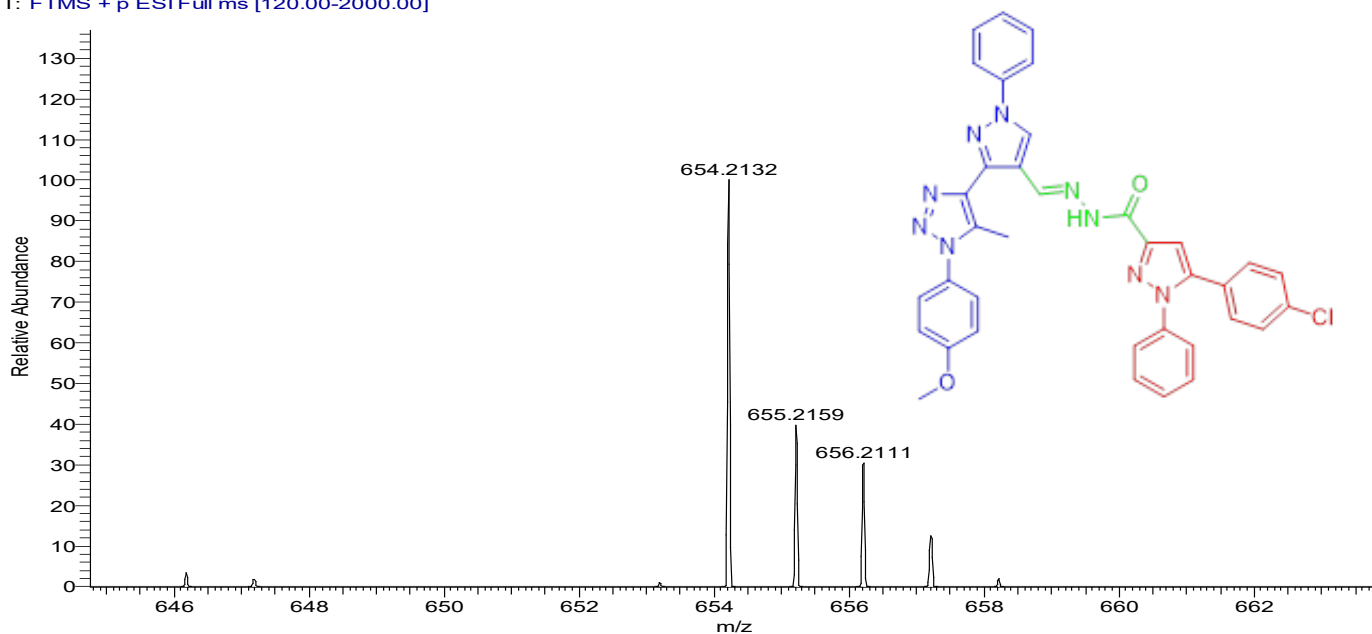

PY3OT #150 RT: 0.51 AV: 1 NL: 8.77E4  
T: FTMS + p ESI Full ms [120.00-2000.00]

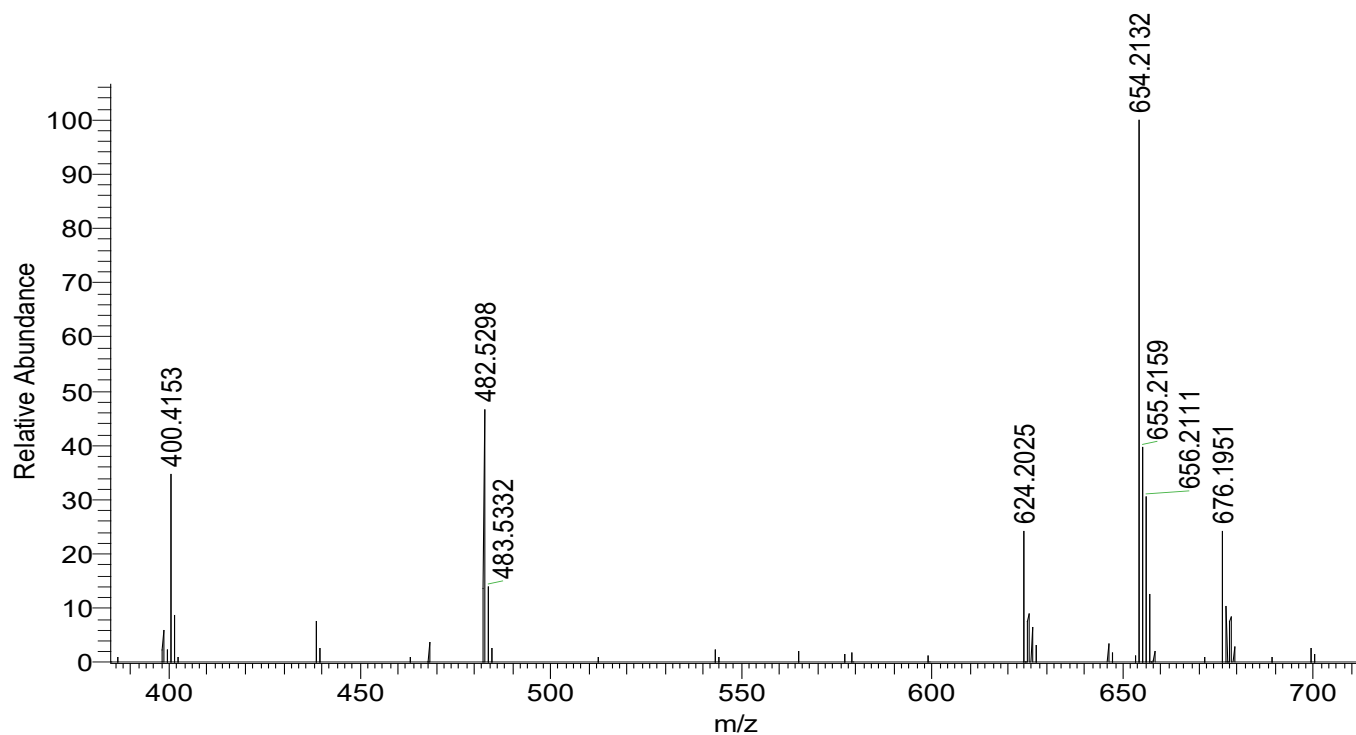

Figure S 60. Mass of compound 12h

PY3CLT #85 RT: 0.29 AV: 1 NL: 3.04E4  
T: FTMS + p ESI Full ms [120.00-2000.00]

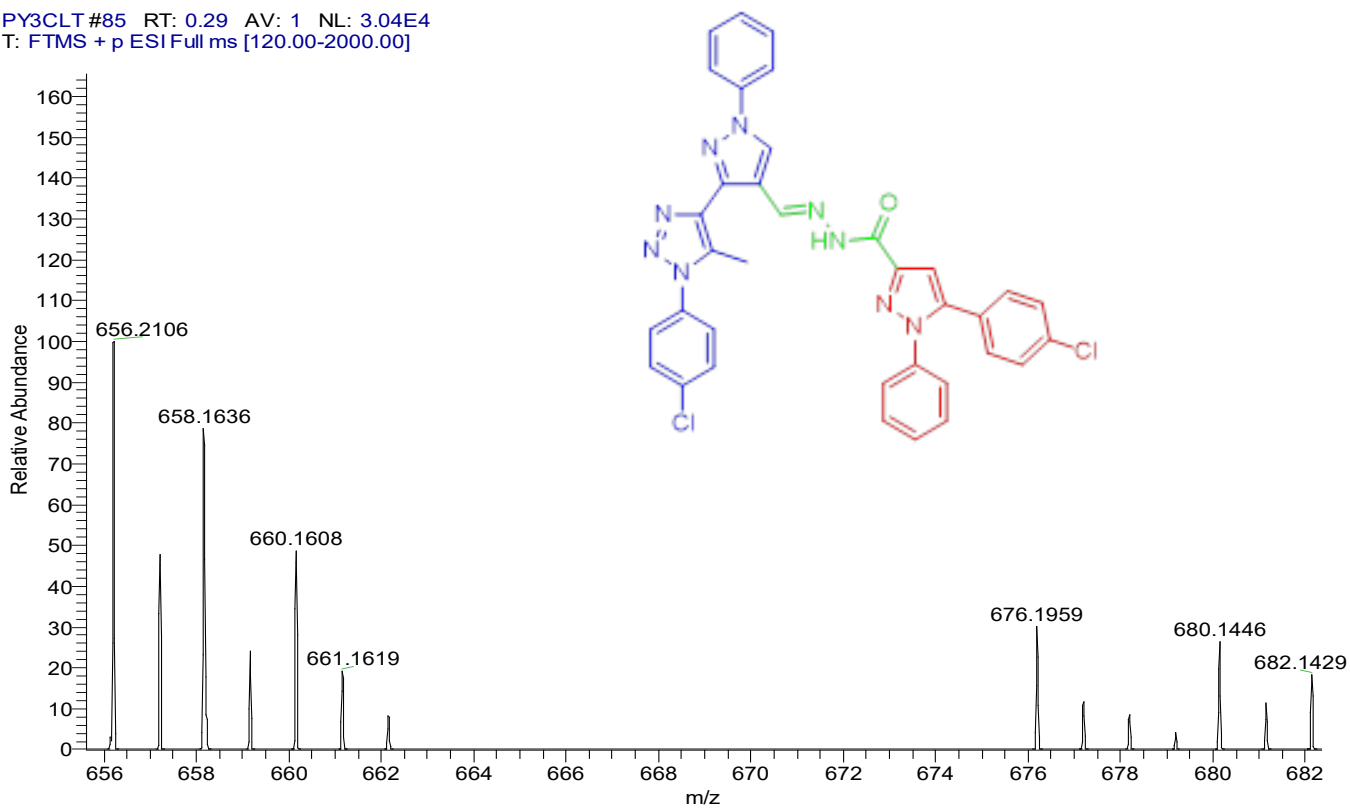

PY3CLT #85 RT: 0.29 AV: 1 NL: 9.59E4  
T: FTMS + p ESI Full ms [120.00-2000.00]

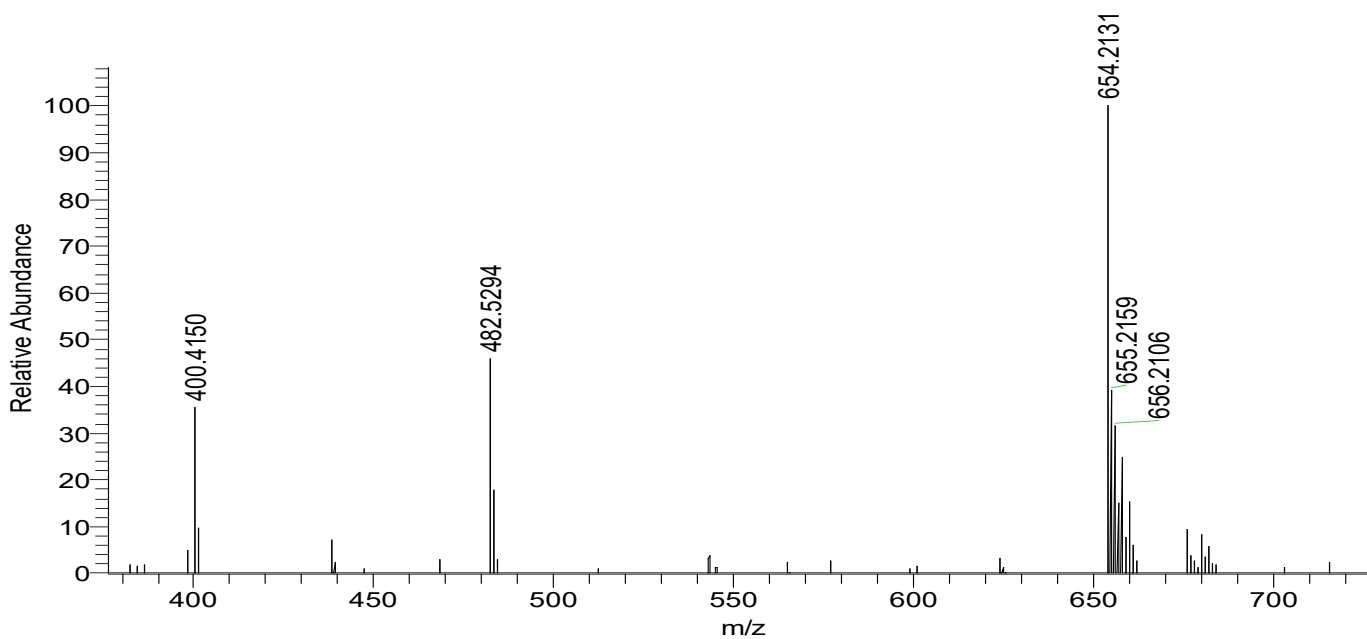

Figure S 61. Mass of compound 12i

# **Infera Red Charts**

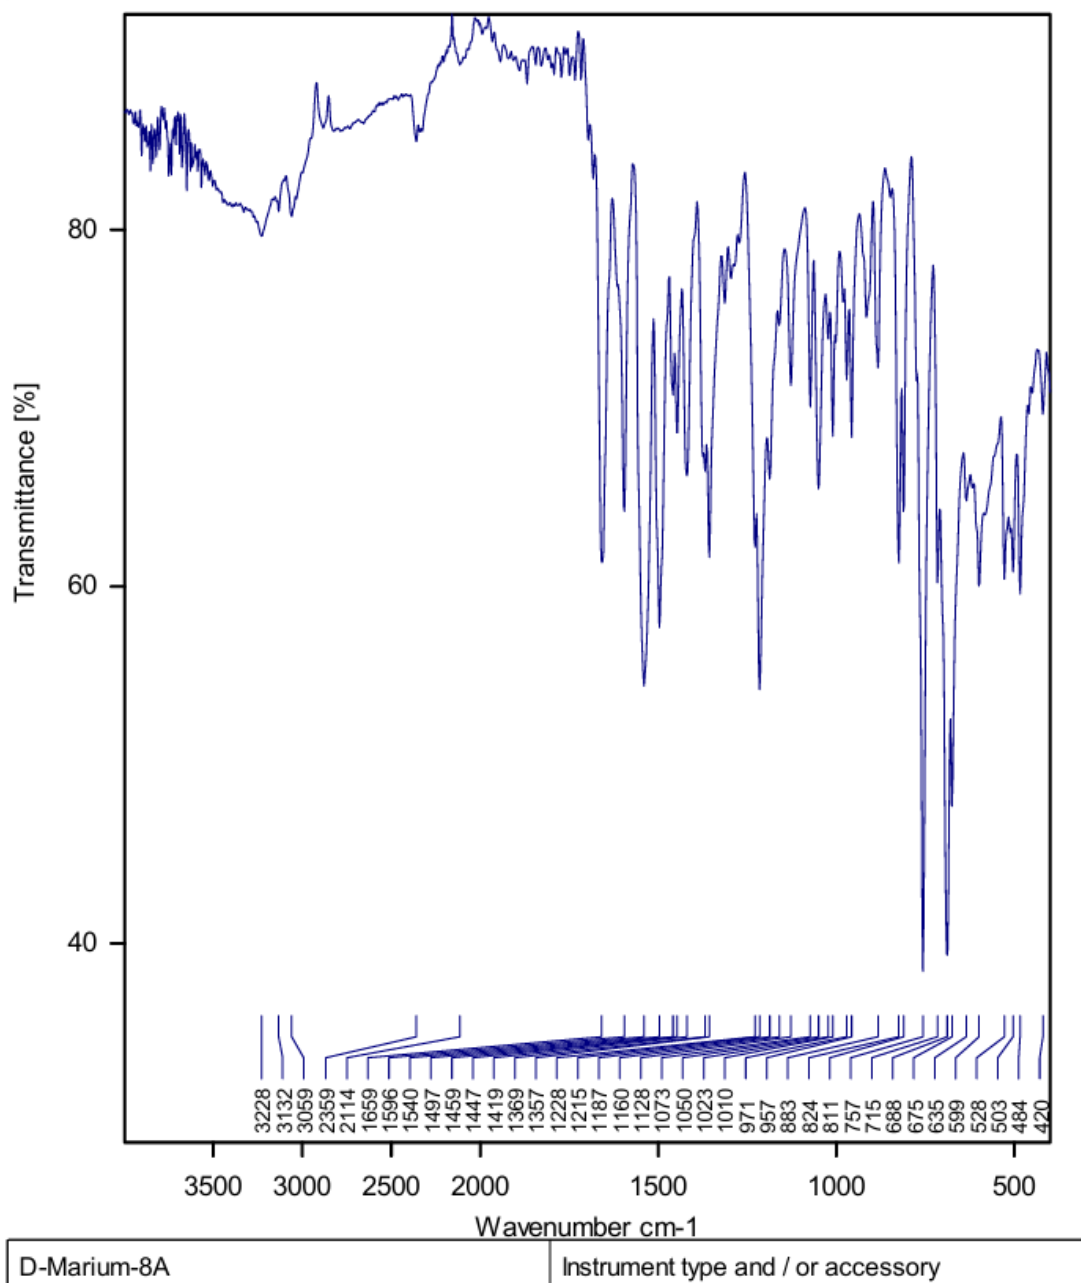

Figure S 62. IR of compound 8a

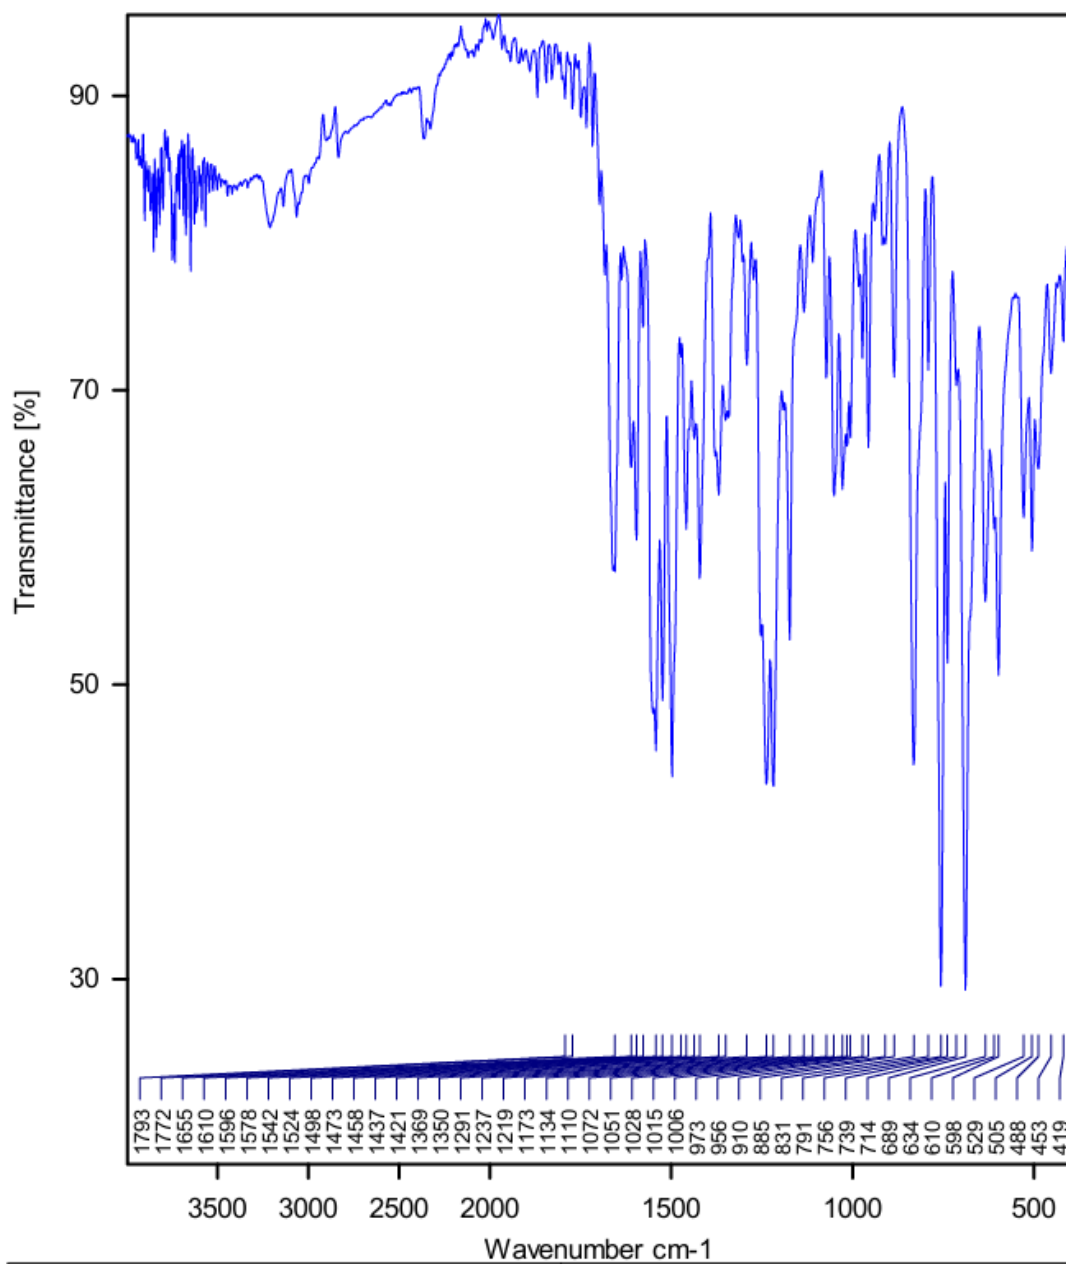

D-Marium-8B

Instrument type and / or accessory

**Figure S 63. IR of compound 8b**

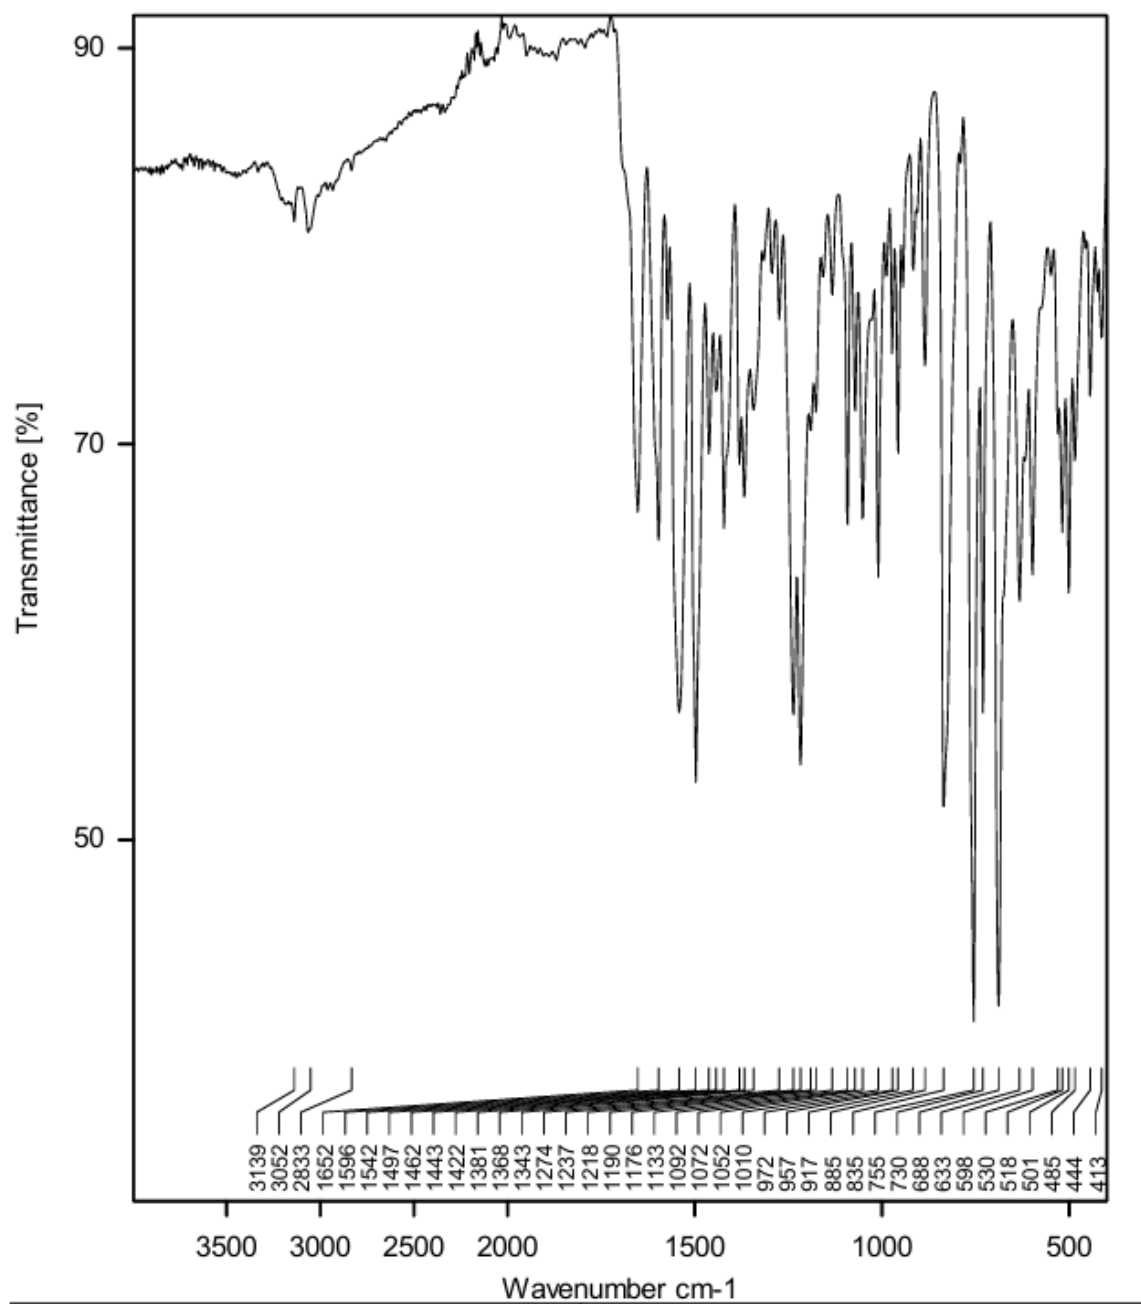

|             |                                    |
|-------------|------------------------------------|
| D-Marium-8C | Instrument type and / or accessory |
|-------------|------------------------------------|

Figure S 64. IR of compound 8c

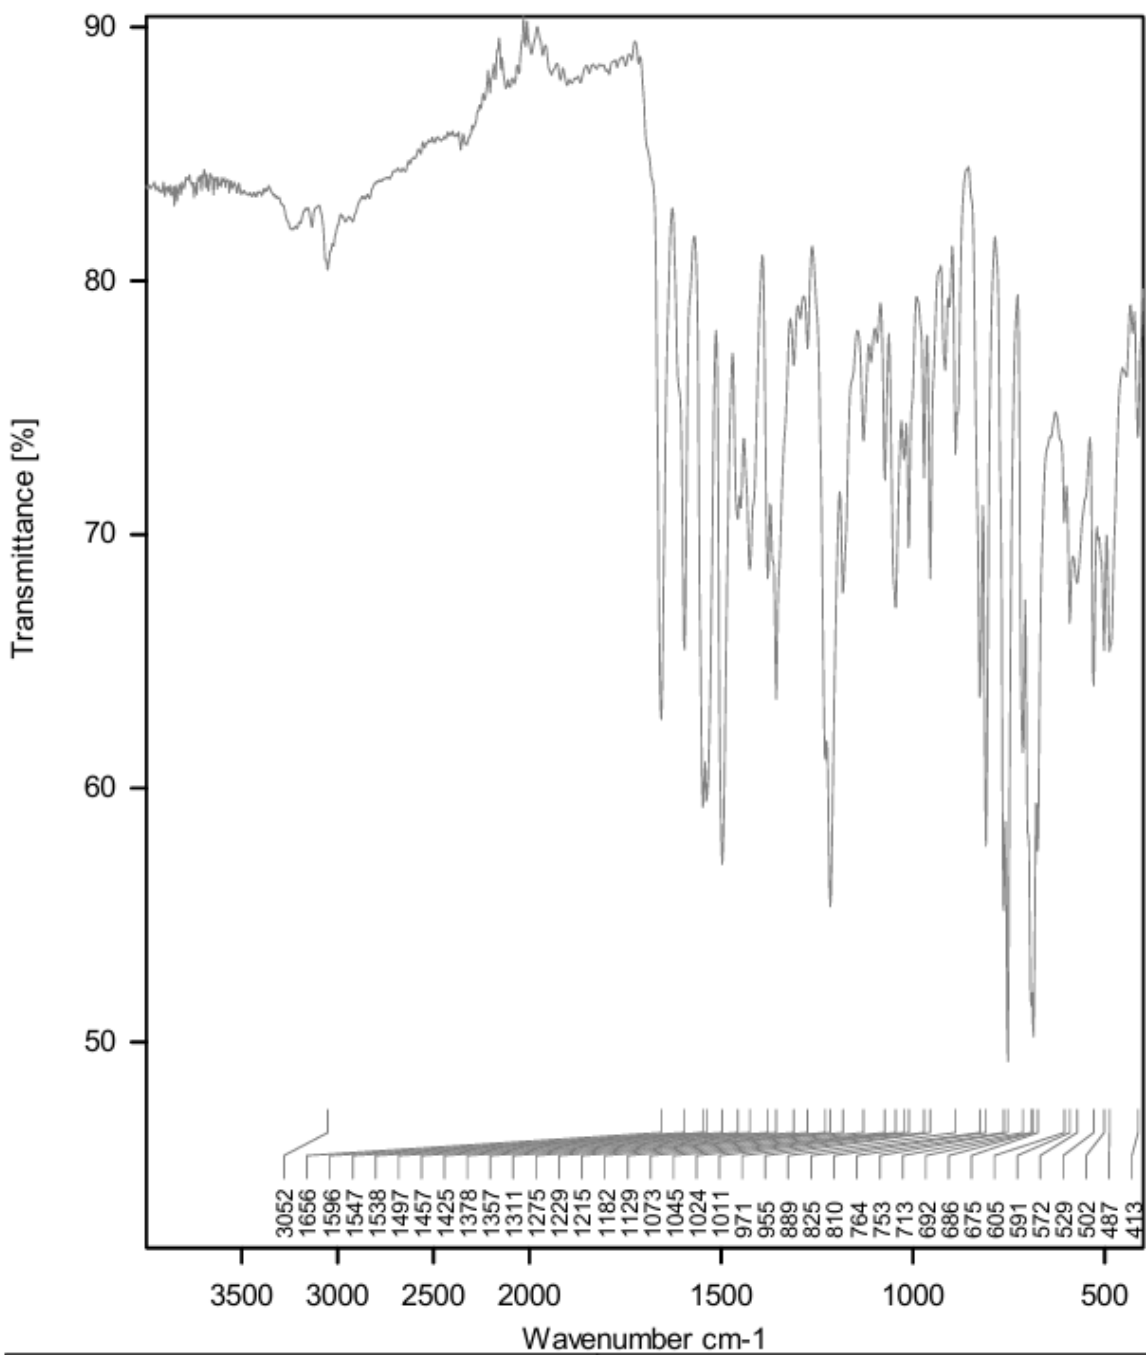

|             |                                    |
|-------------|------------------------------------|
| D-Marium-8D | Instrument type and / or accessory |
|-------------|------------------------------------|

Figure S 65. IR of compound 8d

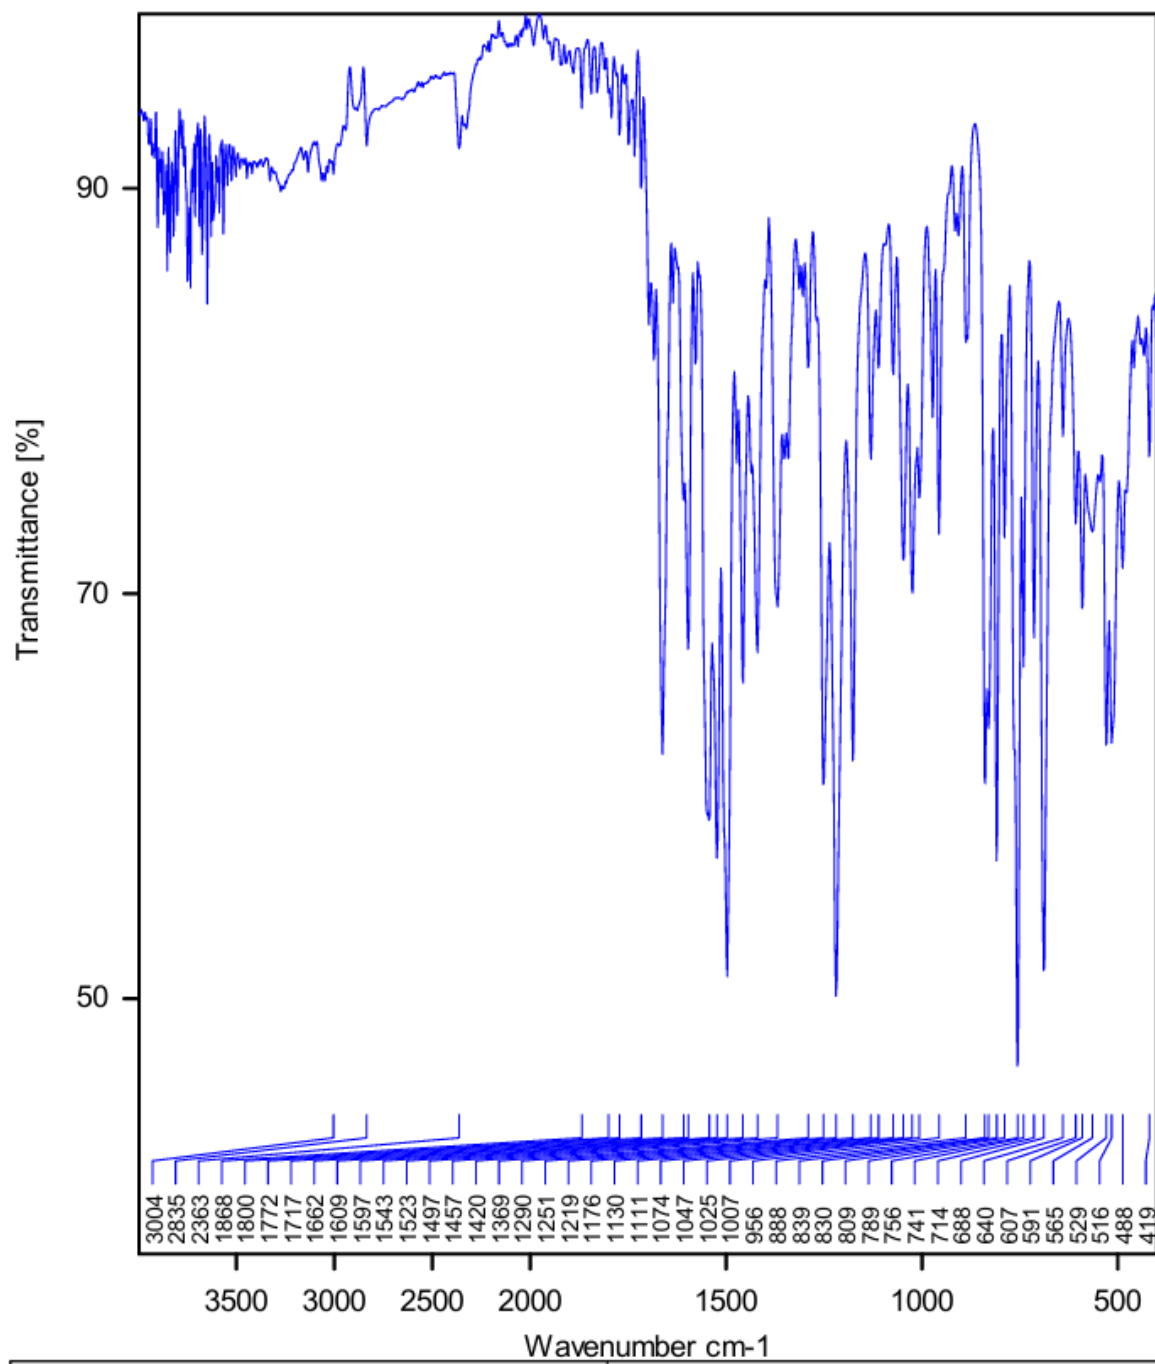

|             |                                    |
|-------------|------------------------------------|
| D-Marium-8E | Instrument type and / or accessory |
|-------------|------------------------------------|

Figure S 66. IR of compound 8e

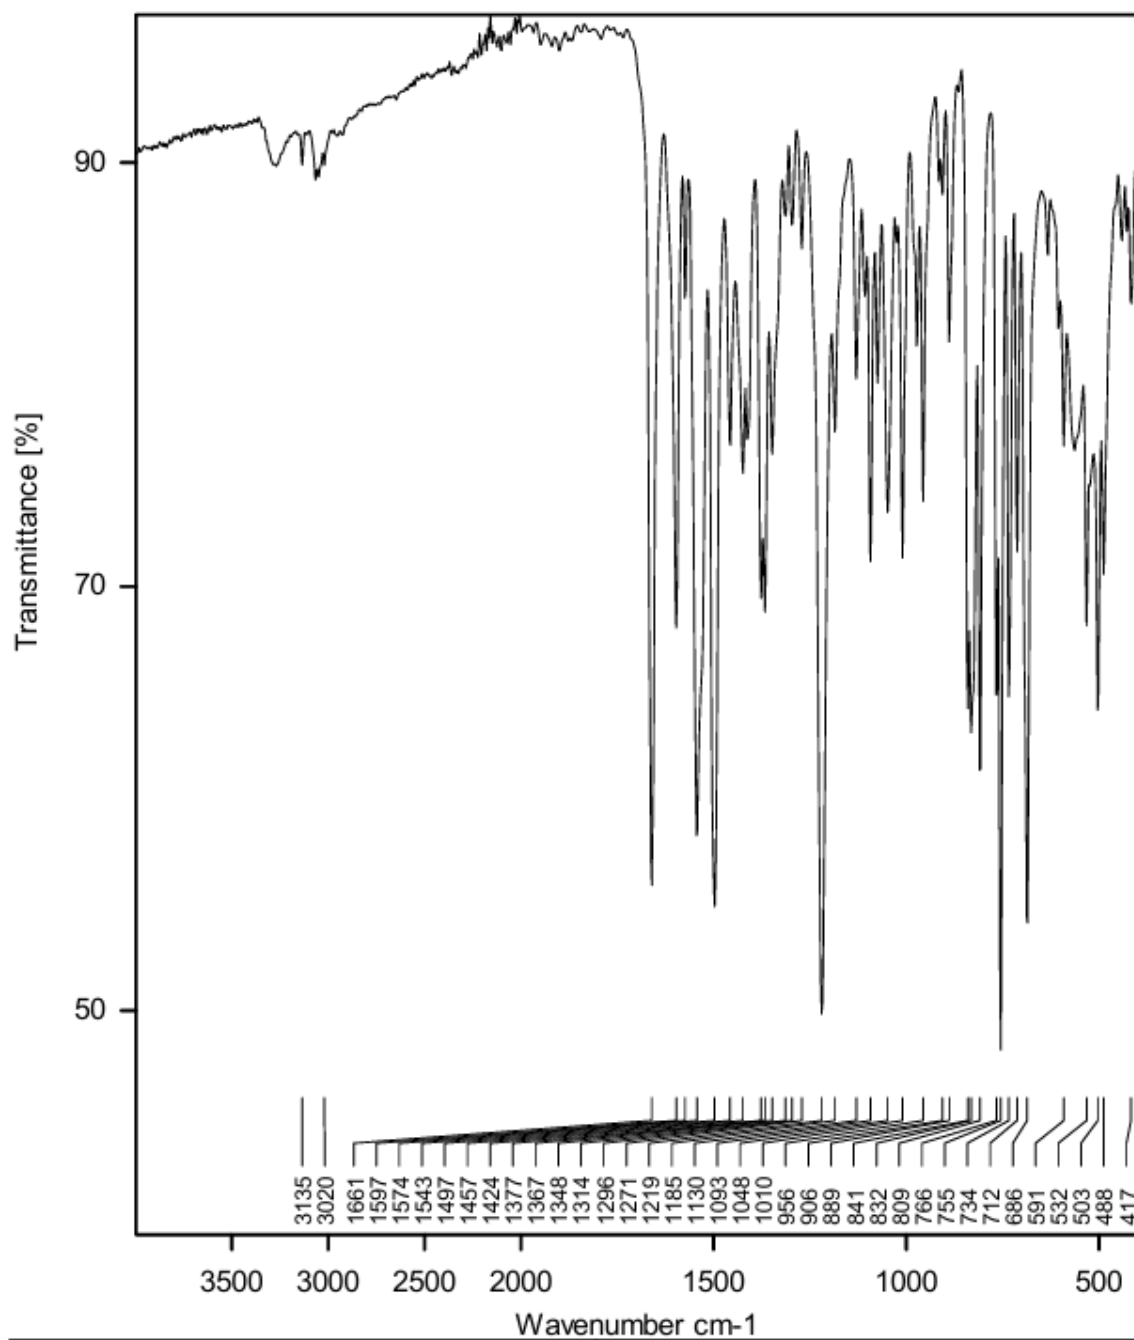

D-Marium-8F

Instrument type and / or accessory

**Figure S 67. IR of compound 8f**

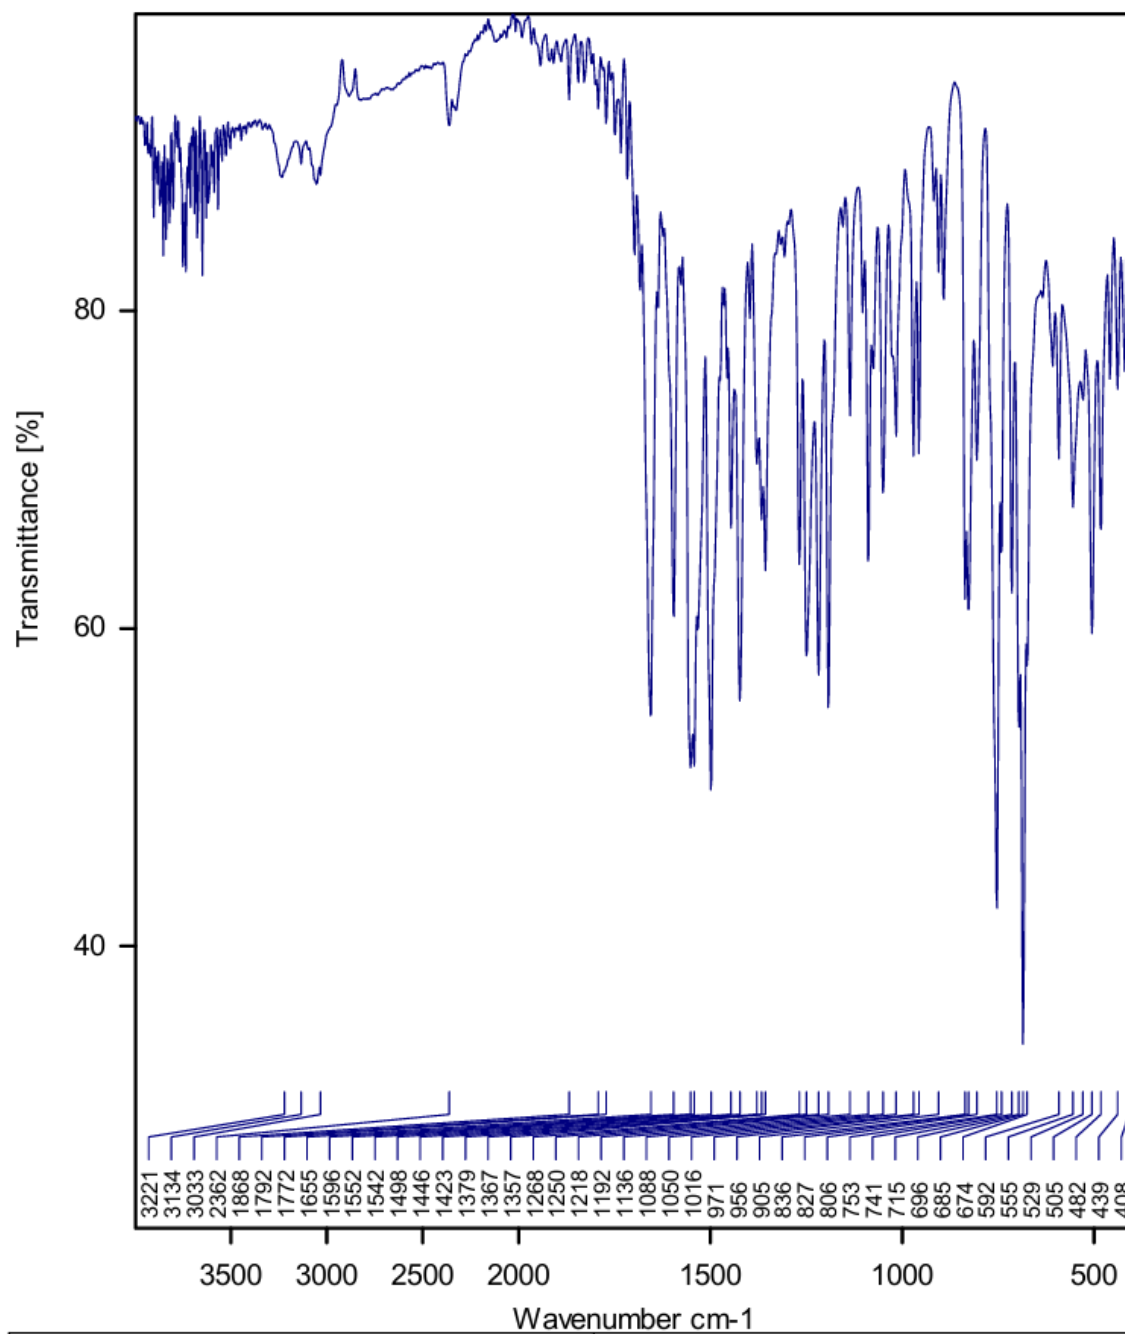

D-Marium-8G

Instrument type and / or accessory

**Figure S 68. IR of compound 8g**

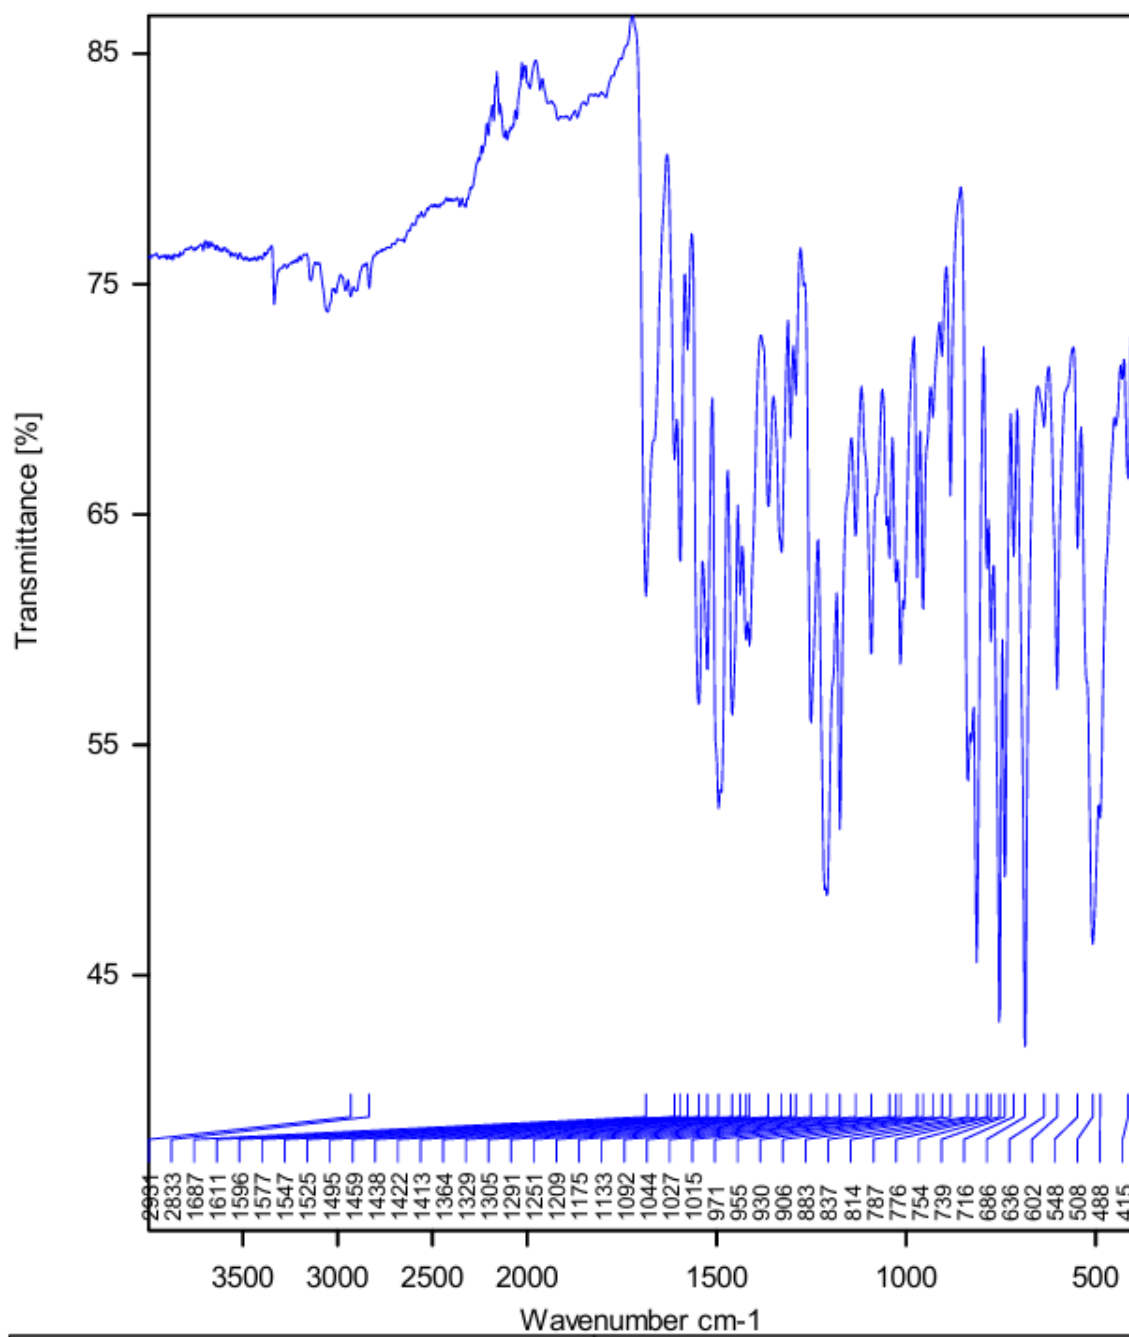

D-Marium-8H

Instrument type and / or accessory

Figure S 69. IR of compound 8h

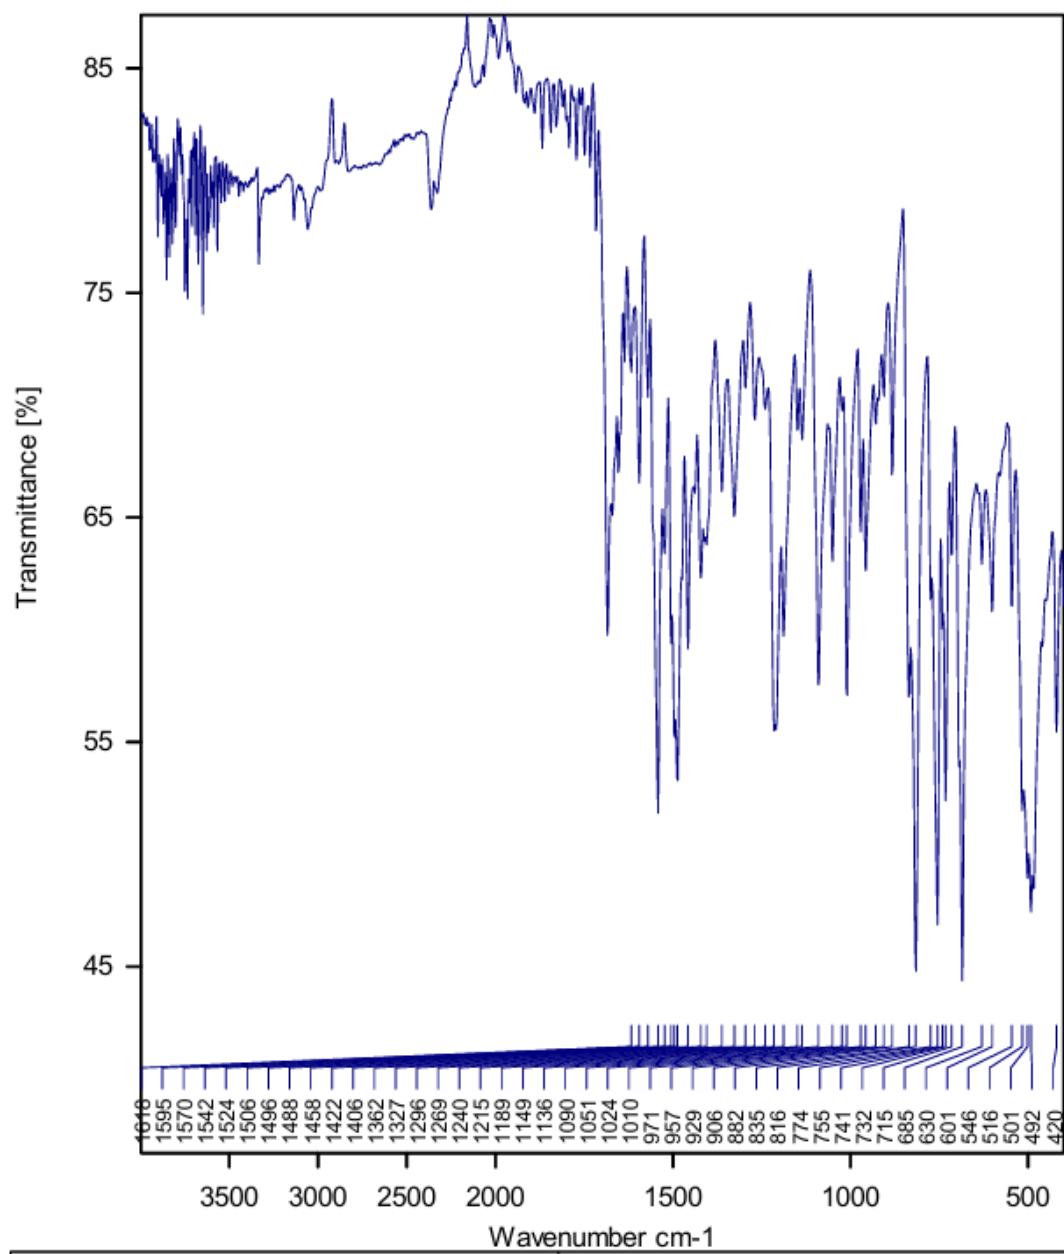

D-Marium-8l

Instrument type and / or accessory

**Figure S 70. IR of compound 8i**

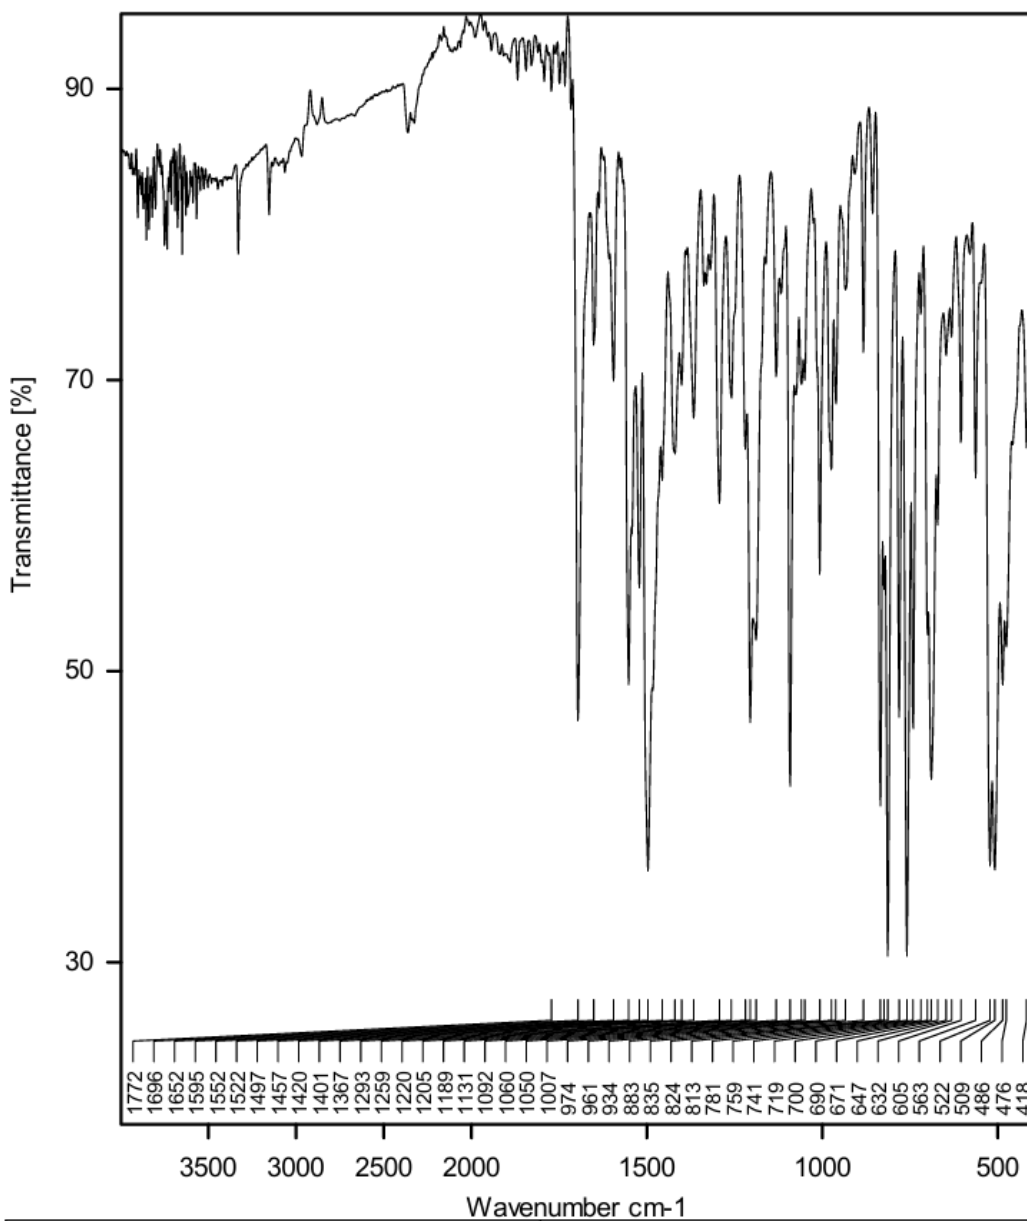

D-Marium-12I

Instrument type and / or accessory

**Figure S 71. IR of compound 12i**
